# Supplementary material for: Meta-Analysis of in vitro-Differentiated Macrophages Identifies Transcriptomic Signatures That Classify Disease Macrophages in vivo
Source: Front Immunol. 2019 Dec 11;10:2887. doi: 10.3389/fimmu.2019.02887 (PMC6917623; doi:10.3389/fimmu.2019.02887)
Supplement: Supplementary file 11 [file Table_4.xlsx]

## Sheet: GSE93776
GSM2461873	GSM2461874	GSM2461875	GSM2461876	GSM2461877	GSM2461878	GSM2461879	GSM2461880	GSM2461881	GSM2461882	GSM2461883	GSM2461884	GSM2461885	GSM2461886	GSM2461887	GSM2461888	GSM2461889	GSM2461890	GSM2461891	GSM2461892	GSM2461893	GSM2461894	GSM2461895	GSM2461896	GSM2461897	GSM2461898	GSM2461899	GSM2461900	GSM2461901	GSM2461902	GSM2461903	GSM2461904	GSM2461905	GSM2461906	GSM2461907	GSM2461908	GSM2461909	GSM2461910	GSM2461911	GSM2461912	GSM2461913	GSM2461914	GSM2461915	GSM2461916	GSM2461917	GSM2461918	GSM2461919	GSM2461920	GSM2461921	GSM2461922
1.04445	1.04445	1.04445	1.04445	1.04445	1.04445	1.04445	1.04445	1.04445	1.04445	1.04445	1.04445	1.04445	1.04445	1.04445	1.04445	1.04445	1.04445	1.04445	1.04445	1.04445	1.04445	1.04445	1.04445	1.04445	1.04445	1.04445	1.04445	1.04445	1.04445	1.04445	1.04445	1.04445	1.04445	1.04445	1.04445	1.04445	1.04445	1.04445	1.04445	1.04445	1.04445	1.04445	1.04445	1.04445	1.04445	1.04445	1.04445	1.04445	1.04445
-1.62057	-1.6114	-1.81761	-1.60757	-1.63771	-1.5992	-1.71254	-1.5687	-1.66252	-1.49605	-1.53659	-1.43196	-1.56519	-1.62214	-1.4559	-1.51167	-1.50566	-1.55774	-1.50646	-1.60771	-1.50305	-1.61985	-1.58078	-1.61625	-1.63395	-1.43513	-1.30155	-1.64951	-1.55569	-1.59304	-1.5446	-1.62237	-1.49057	-1.53969	-1.46027	-1.45828	-1.62675	-1.56517	-1.53414	-1.66833	-1.65419	-1.77959	-1.70943	-1.55683	-1.52486	-1.53717	-1.54017	-1.48056	-1.5349	-1.44424
0.07874	0.0894287	0.0829894	0.0803865	0.0752337	0.0670519	0.119368	0.131245	0.130105	0.0534124	0.0677434	0.0814428	0.0819726	0.0918186	0.0958993	0.0702363	0.0887212	0.0829312	0.0758664	0.0934409	0.082161	0.0792296	0.0729542	0.0627508	0.0923901	0.0973474	0.0756846	0.0767577	0.087301	0.0965899	0.0822921	0.0927469	0.0877021	0.0888299	0.0930887	0.0872876	0.0663338	0.0607174	0.0717208	0.0443423	0.068002	0.0545745	0.054634	0.0429943	0.0746933	0.0580288	0.055377	0.0420166	0.0468692	0.0492045
0.0124466	0.015114	0.0153971	0.0124124	0.0127294	0.0160446	0.00904601	0.0135449	0.0144266	0.00903359	0.0112922	0.0135132	0.00848024	0.0125822	0.0153963	0.012877	0.0119939	0.0147718	0.0125604	0.0149763	0.0158294	0.0118871	0.0145025	0.0125254	0.0136776	0.0148852	0.0145625	0.0134892	0.0135817	0.0161782	0.00912692	0.0120133	0.013769	0.00868164	0.0130505	0.0139156	0.0121283	0.0167317	0.0180114	0.0179308	0.0114975	0.0173024	0.0177617	0.0172346	0.0104345	0.0181484	0.0197999	0.0198995	0.0117577	0.0140719
-0.603098	-0.565172	-0.52673	-0.55723	-0.501102	-0.472229	-0.591164	-0.598298	-0.546967	-0.585243	-0.591339	-0.554052	-0.599122	-0.57606	-0.580484	-0.568553	-0.555335	-0.541205	-0.608549	-0.605704	-0.58381	-0.597171	-0.5764	-0.615103	-0.602155	-0.618271	-0.601618	-0.558826	-0.55739	-0.52091	-0.596271	-0.573846	-0.575026	-0.582311	-0.585048	-0.563491	-0.602445	-0.534219	-0.546379	-0.510284	-0.527278	-0.503172	-0.439968	-0.464122	-0.581398	-0.557683	-0.56524	-0.539407	-0.598983	-0.537948
0.500725	0.513694	0.561889	0.559704	0.496187	0.543001	0.504365	0.5046	0.498053	0.515619	0.483459	0.463746	0.490829	0.505103	0.497894	0.489324	0.490462	0.468124	0.523219	0.51831	0.529942	0.513399	0.502972	0.520658	0.504861	0.481184	0.509087	0.516447	0.533047	0.562023	0.501395	0.503865	0.477269	0.478946	0.471493	0.54432	0.508202	0.531703	0.514158	0.496667	0.534884	0.541287	0.527164	0.486853	0.473276	0.511778	0.48132	0.488422	0.484089	0.49316
0.709817	0.632793	0.618578	0.60409	0.59329	0.813078	0.711532	0.794399	0.863424	0.930507	0.599446	0.765545	0.83264	0.817999	0.742444	0.693837	0.862839	0.841826	0.585771	0.527756	0.74084	0.764391	0.701068	0.885647	0.580593	0.724063	0.568103	0.754653	0.777203	0.599237	0.828662	0.764266	0.788049	0.602989	0.709385	0.787854	0.548977	0.546797	0.576187	0.723502	0.632948	0.613141	0.545004	0.61022	0.981423	0.867024	0.741151	0.811726	0.779428	0.8152
1.10194	1.11619	1.0857	1.17855	1.03614	1.17007	1.26408	1.21664	1.16399	0.980334	1.093	1.21172	0.916898	1.21118	1.11842	0.938303	1.156	1.20876	1.06804	1.06886	1.03145	1.13913	1.11424	1.11199	0.884217	0.882047	1.05499	0.79618	0.941391	1.15358	1.09299	1.06156	1.16163	1.06529	1.12246	1.17914	0.959283	0.944659	0.970399	1.04169	0.801705	0.809996	0.987567	1.0882	0.940394	0.990981	1.03537	0.894466	1.09422	0.821176
1.59548	1.56063	1.37298	0.944231	1.20837	1.56925	1.10409	1.09332	0.997165	1.00726	1.17155	1.45574	1.42572	1.53255	1.28058	1.13029	1.28289	1.4033	1.18889	1.97224	1.2191	0.971108	1.41947	1.08564	1.56227	1.36463	1.94164	0.933441	1.20687	1.1244	1.07458	1.65389	1.26726	1.5132	1.18808	1.35855	1.2495	1.43546	1.60907	1.72652	1.08687	1.67608	1.41865	1.45003	1.57027	2.01325	1.84749	1.66012	1.13841	1.53466
-0.946714	-0.816142	-0.731585	-0.45139	-0.708869	-0.835427	-1.03042	-0.86098	-0.925589	-0.849202	-0.93086	-0.794604	-0.943702	-0.832544	-0.884519	-0.992646	-0.829998	-0.877973	-0.763939	-0.568223	-0.748182	-0.997315	-0.981138	-0.860989	-0.8938	-0.587808	-0.715217	-0.883034	-0.841017	-0.736775	-0.986106	-0.707996	-0.937674	-0.951333	-0.945515	-0.771071	-0.7576	-0.699587	-0.812624	-0.805762	-0.550564	-0.974567	-0.844063	-0.849288	-0.962475	-0.909784	-0.934643	-0.960807	-0.981447	-0.999615
-0.387982	-0.353411	-0.41838	-0.420225	-0.397893	-0.434048	-0.382132	-0.387825	-0.375232	-0.401152	-0.348983	-0.532035	-0.373482	-0.391217	-0.413651	-0.403894	-0.401798	-0.375173	-0.390685	-0.406851	-0.379112	-0.38946	-0.372193	-0.396581	-0.376384	-0.341205	-0.371397	-0.407395	-0.41172	-0.393497	-0.393677	-0.351673	-0.507023	-0.396093	-0.370858	-0.39463	-0.388138	-0.38424	-0.380705	-0.412858	-0.439981	-0.424211	-0.408594	-0.369269	-0.38206	-0.358692	-0.376447	-0.378446	-0.369556	-0.376307
0.00446567	0.00441374	0.00521009	0.00456166	0.00421779	0.00453766	0.00469595	0.00424323	0.00459098	0.00448979	0.00427748	0.00407832	0.0042625	0.00406706	0.00422534	0.00401388	0.00379298	0.00418309	0.00412396	0.00447689	0.00523662	0.00526716	0.00440321	0.00455998	0.00485686	0.00427522	0.00419396	0.00457176	0.00428928	0.00468729	0.00441327	0.00485802	0.00430053	0.00439331	0.00415052	0.00427069	0.00455845	0.00556826	0.00469526	0.0043424	0.00564574	0.00459305	0.00504652	0.00423396	0.00410221	0.00463379	0.00444772	0.00431595	0.00421699	0.00436359
0.0612516	0.0595169	0.059719	0.0587143	0.0585008	0.05946	0.0610259	0.0622026	0.0614062	0.0563157	0.0568934	0.0595833	0.0596351	0.056973	0.0589457	0.05907	0.06036	0.0602347	0.058153	0.0572669	0.0592699	0.0591736	0.0602108	0.0596257	0.0553242	0.0601052	0.0617635	0.0598767	0.0642302	0.0628125	0.0593655	0.0622606	0.0596621	0.0601138	0.0595175	0.0595443	0.0618758	0.0580478	0.0610253	0.0597361	0.0593457	0.0653429	0.0672293	0.0640596	0.062836	0.0643615	0.0671193	0.0662554	0.0597153	0.0628092
0.890234	0.857677	0.98246	0.96033	0.928036	0.918894	0.913217	0.847809	0.809372	0.911764	0.906533	0.80459	0.966656	0.845573	0.926943	0.943542	0.933708	0.850038	0.946791	0.909916	0.793231	0.947881	0.959496	0.850403	0.92516	0.920769	0.890851	0.919041	0.911235	0.927238	0.858065	0.941079	0.89377	0.873621	0.814223	0.850894	0.951522	0.951544	0.911424	0.945527	0.982323	0.96013	0.923877	0.900115	0.88847	0.899535	0.881569	0.875483	0.812759	0.888398
0.0996053	0.102029	0.138927	0.108029	0.103018	0.102306	0.101577	0.089036	0.101965	0.0953525	0.101128	0.0868618	0.105051	0.100993	0.101829	0.102941	0.105306	0.102424	0.110157	0.101132	0.0997969	0.109746	0.100101	0.105353	0.102537	0.0999152	0.103826	0.119808	0.107635	0.10536	0.101366	0.104577	0.092472	0.100702	0.0948477	0.0981735	0.104274	0.12397	0.112692	0.0973339	0.126895	0.106087	0.112698	0.10121	0.102251	0.0962793	0.102813	0.104105	0.0979424	0.10355
-0.685956	-0.700401	-0.778462	-0.758231	-0.750373	-0.713293	-0.723494	-0.695109	-0.71454	-0.709833	-0.717074	-0.678672	-0.744957	-0.753979	-0.684118	-0.736886	-0.720633	-0.724191	-0.746659	-0.732184	-0.741373	-0.749528	-0.689065	-0.711621	-0.720718	-0.672342	-0.710611	-0.724145	-0.776428	-0.797013	-0.713602	-0.685727	-0.71824	-0.707172	-0.663804	-0.712702	-0.714409	-0.766526	-0.76191	-0.735242	-0.735181	-0.809951	-0.78453	-0.765921	-0.703748	-0.730655	-0.714859	-0.728881	-0.704945	-0.695195
-0.61728	-0.742581	-0.669482	-0.692338	-0.713239	-0.745695	-0.642641	-0.683424	-0.713937	-0.656977	-0.715778	-0.68572	-0.72727	-0.62601	-0.738512	-0.658963	-0.758963	-0.748419	-0.715396	-0.805246	-0.688884	-0.645435	-0.723656	-0.717125	-0.669925	-0.664703	-0.614117	-0.71062	-0.685403	-0.751916	-0.641239	-0.682603	-0.71725	-0.669704	-0.700363	-0.702001	-0.713747	-0.624552	-0.671846	-0.682878	-0.700627	-0.762571	-0.731265	-0.647847	-0.661982	-0.630749	-0.642186	-0.598524	-0.659297	-0.671935
-0.893658	-0.97885	-1.03765	-0.672455	-0.931773	-1.06981	-0.841218	-0.864013	-1.07442	-0.823837	-1.05948	-1.18138	-0.773556	-0.957107	-1.04926	-0.881415	-1.04507	-1.1336	-0.907445	-0.955909	-1.08395	-0.94273	-1.01413	-1.10936	-0.870482	-1.02088	-1.08774	-0.73146	-0.959225	-1.02775	-0.9083	-1.01609	-1.11431	-0.923679	-1.03142	-1.10077	-0.752531	-0.74802	-0.880866	-0.71802	-0.67409	-0.920643	-0.845465	-0.649015	-0.639277	-1.04277	-0.937434	-0.906515	-0.659856	-1.0105
-0.017646	-0.0104565	-0.012908	-0.0120488	-0.0119134	-0.0110488	-0.0111697	-0.0115229	-0.0123008	-0.0116656	-0.0112048	-0.0116215	-0.0127871	-0.0119707	-0.0112083	-0.0122511	-0.0112623	-0.0127456	-0.0106943	-0.0120513	-0.0109766	-0.0110747	-0.0113014	-0.0113675	-0.0128423	-0.01105	-0.01168	-0.0116049	-0.0133602	-0.0114366	-0.0110793	-0.0107999	-0.0108231	-0.0111408	-0.01232	-0.0119039	-0.010868	-0.0108698	-0.0105862	-0.0108679	-0.0106514	-0.0113321	-0.011986	-0.0112263	-0.0121192	-0.0108897	-0.0112703	-0.0145777	-0.0111193	-0.0108236
0.396493	0.391896	0.385881	0.399421	0.385102	0.379007	0.356603	0.374509	0.351927	0.374515	0.37719	0.381354	0.36355	0.377727	0.373244	0.379567	0.379368	0.371852	0.363042	0.392752	0.377117	0.391668	0.39077	0.370317	0.387307	0.400733	0.379042	0.353239	0.367986	0.357946	0.371984	0.377806	0.378759	0.380849	0.385878	0.388818	0.377582	0.391226	0.379197	0.368929	0.38086	0.387111	0.377324	0.374935	0.376716	0.372253	0.360474	0.369512	0.376998	0.363198
1.29394	1.3102	1.26632	1.24614	1.32141	1.27434	1.34474	1.35181	1.35483	1.31711	1.31306	1.34685	1.4003	1.35266	1.3682	1.32903	1.32358	1.37388	1.39191	1.34057	1.37586	1.32199	1.35512	1.40366	1.3208	1.3164	1.37127	1.41158	1.35337	1.32019	1.31773	1.32756	1.3279	1.31957	1.30255	1.31913	1.31594	1.22019	1.35538	1.30927	1.28921	1.19366	1.42887	1.3477	1.40356	1.43013	1.34512	1.40084	1.35188	1.35324
-0.112026	-0.10979	-0.113903	-0.111106	-0.109656	-0.114273	-0.107897	-0.110368	-0.111442	-0.117865	-0.111822	-0.109563	-0.126479	-0.117321	-0.106156	-0.11546	-0.11839	-0.113749	-0.112131	-0.115008	-0.118716	-0.11313	-0.113347	-0.109219	-0.119458	-0.111596	-0.109141	-0.115171	-0.110129	-0.108661	-0.107702	-0.110991	-0.109207	-0.113312	-0.107706	-0.108096	-0.11165	-0.123944	-0.109873	-0.116872	-0.111469	-0.115064	-0.108509	-0.112859	-0.112504	-0.105684	-0.109638	-0.104653	-0.108315	-0.108617
0.368566	0.366659	0.40446	0.38266	0.384416	0.37175	0.352346	0.359313	0.358258	0.350811	0.340776	0.343638	0.39092	0.356056	0.361908	0.349529	0.336835	0.330663	0.336319	0.366132	0.348833	0.363581	0.34323	0.390295	0.363125	0.364738	0.346024	0.365785	0.351349	0.379165	0.334502	0.370382	0.34013	0.334877	0.352197	0.342794	0.383011	0.429793	0.363731	0.382687	0.395928	0.382893	0.389452	0.363034	0.350775	0.356496	0.367436	0.355954	0.349874	0.355113
1.02999	1.01416	0.812943	0.944932	0.970254	0.901665	0.961503	1.01307	0.808888	0.875628	0.791327	0.896878	1.01556	0.862338	0.912786	1.0494	0.770105	0.863051	0.841501	0.806823	0.729173	0.866065	0.93493	1.0128	1.037	0.781245	0.961337	0.95878	0.868758	0.972589	0.951963	0.992039	1.01089	0.976749	1.00167	0.908469	0.762853	0.794453	0.748328	0.86909	0.782012	0.848452	0.997267	0.908481	1.03364	0.811243	0.973886	0.906631	0.830572	0.724916
-0.0332392	-0.0319094	-0.033081	-0.0321789	-0.0344109	-0.0305603	-0.0321429	-0.0336204	-0.0358383	-0.0447038	-0.0324911	-0.0293212	-0.0323095	-0.0347517	-0.0378431	-0.0338855	-0.0331443	-0.0311989	-0.039124	-0.0299539	-0.032026	-0.0344012	-0.0348732	-0.0308016	-0.0323362	-0.0339827	-0.0414866	-0.0321919	-0.0380786	-0.0315365	-0.0382935	-0.0304333	-0.0366767	-0.0311119	-0.0342003	-0.0368874	-0.0299043	-0.0322509	-0.032771	-0.0370033	-0.0330568	-0.0315476	-0.0329111	-0.0315216	-0.0424124	-0.0345161	-0.0320389	-0.0354614	-0.0305801	-0.0331765
1.10399	1.01352	0.876529	1.08105	0.973874	0.899996	1.10394	1.01496	1.0177	1.05703	1.03045	0.973836	1.09731	1.04407	0.959736	1.08049	1.05839	1.03309	1.09012	1.00866	0.973523	1.06481	1.05133	0.983429	1.01728	1.07122	1.03209	1.0736	1.06737	0.992641	1.08188	1.00663	0.986065	1.09447	1.04387	0.996154	1.07483	1.04202	0.905546	0.882395	1.10583	0.982731	0.89824	0.848434	1.09195	0.92873	0.854513	0.844251	1.05799	0.98499
0.342805	0.37433	0.402279	0.29735	0.268633	0.357241	0.290936	0.295622	0.284886	0.443106	0.33154	0.420204	0.286748	0.269048	0.320022	0.282435	0.313919	0.355841	0.260327	0.345522	0.298553	0.278347	0.3482	0.366047	0.332444	0.330697	0.41563	0.289579	0.39869	0.341101	0.33461	0.26177	0.353054	0.334534	0.256407	0.309274	0.391151	0.415982	0.438807	0.462124	0.330447	0.279369	0.266297	0.254586	0.324639	0.375652	0.3473	0.33784	0.391348	0.438787
-0.414869	-0.417327	-0.406897	-0.407349	-0.397733	-0.426289	-0.419858	-0.42205	-0.404185	-0.405804	-0.428547	-0.416121	-0.431063	-0.409106	-0.421994	-0.415046	-0.427571	-0.434064	-0.421384	-0.413556	-0.425352	-0.41902	-0.457199	-0.410056	-0.434127	-0.447828	-0.437156	-0.393144	-0.381494	-0.433819	-0.450202	-0.446457	-0.415185	-0.438989	-0.449289	-0.4382	-0.41594	-0.395143	-0.400216	-0.428005	-0.408449	-0.423404	-0.404192	-0.427954	-0.39425	-0.404524	-0.413712	-0.401765	-0.418429	-0.39513
0.704163	0.75691	0.902539	0.744481	0.73397	0.778092	0.754938	0.799034	0.790641	0.750981	0.811159	0.71027	0.796096	0.826091	0.806075	0.731849	0.779815	0.805443	0.7919	0.865543	0.800038	0.700506	0.687363	0.799856	0.795878	0.777376	0.826361	0.769413	0.784171	0.766445	0.741106	0.727533	0.754007	0.764988	0.737357	0.803874	0.757561	0.849384	0.775996	0.882221	0.837598	0.823887	0.802182	0.746127	0.750868	0.759809	0.711058	0.728585	0.743256	0.736833
5.00605	4.88617	4.47256	4.92936	4.40316	4.81836	4.50777	4.77391	4.0791	4.67538	4.05111	4.63926	4.95716	4.97908	4.60535	4.36051	4.5947	4.6648	4.47068	5.18642	4.20897	4.11351	4.55073	4.48154	4.65799	4.79128	5.59918	4.24359	4.553	4.42028	4.3994	5.0703	4.40914	4.68273	4.33388	4.79887	4.45005	4.97818	4.7189	5.23262	4.63092	4.03503	4.54279	4.76704	5.46766	5.27966	4.96304	4.80527	4.59833	4.50463
0.852937	0.852937	0.852937	0.852937	0.852937	0.852937	0.852937	0.852937	0.852937	0.852937	0.852937	0.852937	0.852937	0.852937	0.852937	0.852937	0.852937	0.852937	0.852937	0.852937	0.852937	0.852937	0.852937	0.852937	0.852937	0.852937	0.852937	0.852937	0.852937	0.852937	0.852937	0.852937	0.852937	0.852937	0.852937	0.852937	0.852937	0.852937	0.852937	0.852937	0.852937	0.852937	0.852937	0.852937	0.852937	0.852937	0.852937	0.852937	0.852937	0.852937
-0.469159	-0.619696	-0.571011	-0.311418	-0.635262	-0.558167	-0.474651	-0.639728	-0.640537	-0.414855	-0.578825	-0.620925	-0.443379	-0.636035	-0.657737	-0.53919	-0.63204	-0.616769	-0.642662	-0.708135	-0.688151	-0.529402	-0.599328	-0.580101	-0.540967	-0.605778	-0.606791	-0.548356	-0.674967	-0.671175	-0.411783	-0.583777	-0.615561	-0.4566	-0.554209	-0.614637	-0.568681	-0.620516	-0.605921	-0.549622	-0.437946	-0.620859	-0.469903	-0.473015	-0.565653	-0.626601	-0.543309	-0.491383	-0.533176	-0.62503
0.295291	0.307483	0.342309	0.309905	0.301147	0.3225	0.328803	0.301818	0.300143	0.316761	0.318206	0.316931	0.294609	0.313145	0.328037	0.342958	0.349476	0.311946	0.323629	0.317745	0.316206	0.298003	0.324179	0.301924	0.305552	0.318157	0.321262	0.348914	0.333127	0.45775	0.317008	0.322914	0.308326	0.324731	0.319718	0.337777	0.315	0.345148	0.300625	0.336835	0.341351	0.33211	0.32142	0.327922	0.333088	0.324077	0.328786	0.323852	0.308376	0.313846
-2.63966	-2.76364	-2.61677	-2.76988	-2.7344	-2.66206	-2.63722	-2.8333	-2.87117	-2.66024	-2.7874	-2.93896	-2.75133	-2.66898	-2.82351	-2.85729	-2.8358	-2.91901	-2.83891	-2.75165	-2.84769	-2.68021	-2.91134	-2.99659	-2.59371	-2.63475	-2.73636	-2.69972	-2.78656	-2.62605	-2.70245	-2.79071	-2.90851	-2.97845	-2.94626	-2.89897	-2.58371	-2.51069	-2.80271	-2.81439	-2.62817	-2.81051	-2.81097	-2.89799	-2.65906	-2.68443	-2.73291	-2.72749	-2.77339	-2.7908
1.35788	1.37527	1.38114	1.43026	1.6172	1.39413	1.31427	1.43523	1.48088	1.63738	1.35833	1.48248	1.39911	1.49338	1.49722	1.40243	1.38378	1.3751	1.51823	1.40014	1.43114	1.39441	1.49169	1.47119	1.36477	1.46126	1.45389	1.47661	1.52268	2.60133	1.37966	1.71661	1.40443	1.47517	1.79998	1.70893	1.59821	1.47498	1.484	1.61765	1.35865	1.48163	1.49457	1.40944	1.71359	1.37715	1.41262	1.42698	1.44699	1.36954
-0.197555	-0.198223	-0.198378	-0.159521	-0.138772	-0.192716	-0.19713	-0.182366	-0.186944	-0.146694	-0.129481	-0.180977	-0.209707	-0.141647	-0.218187	-0.188046	-0.180231	-0.216562	-0.212291	-0.176027	-0.179394	-0.176775	-0.158069	-0.134577	-0.145168	-0.12173	-0.153637	-0.150496	-0.190499	-0.217978	-0.173747	-0.1724	-0.137043	-0.156493	-0.183719	-0.171191	-0.197416	-0.199816	-0.208073	-0.221056	-0.179584	-0.215571	-0.189012	-0.18501	-0.225299	-0.202778	-0.211238	-0.201702	-0.16494	-0.220701
-0.265599	-0.258305	-0.242833	-0.272945	-0.303378	-0.255279	-0.239801	-0.272967	-0.275408	-0.264135	-0.282372	-0.292112	-0.278188	-0.273443	-0.275736	-0.28091	-0.282383	-0.288129	-0.290638	-0.286785	-0.27577	-0.272232	-0.284587	-0.268392	-0.298071	-0.281321	-0.286556	-0.288853	-0.297555	-0.297507	-0.237705	-0.262181	-0.278172	-0.246105	-0.243302	-0.297475	-0.260748	-0.228942	-0.201778	-0.166678	-0.249802	-0.27835	-0.211302	-0.204904	-0.266145	-0.194388	-0.172904	-0.15121	-0.269028	-0.235848
2.05192	2.21375	2.13366	1.85301	2.42379	2.27263	1.93912	2.29199	2.5477	1.61469	2.13076	2.36039	1.69007	2.39803	2.53724	1.74946	2.37957	2.53064	2.06703	2.06147	2.60978	1.70191	2.32722	2.30341	1.8861	1.84907	2.42518	1.92366	2.74519	3.41764	1.90075	1.87496	2.3543	1.94288	2.28798	2.39025	1.79777	2.66825	2.11446	2.19973	1.61268	2.08135	2.50826	2.18971	1.66013	2.37609	2.33324	2.40941	1.60385	2.1712
0.617466	0.612269	0.629218	0.642452	0.629517	0.619791	0.632028	0.638212	0.613554	0.630269	0.633144	0.620806	0.655778	0.622118	0.646265	0.577039	0.66876	0.612872	0.652312	0.636416	0.61319	0.662621	0.601561	0.637363	0.632034	0.593891	0.62774	0.706263	0.64864	0.711081	0.608581	0.61857	0.616318	0.603218	0.602423	0.611894	0.624601	0.714738	0.600996	0.590136	0.657931	0.705311	0.624637	0.615724	0.636807	0.603498	0.620855	0.624928	0.572799	0.584838
1.60352	1.52184	1.71027	1.5748	2.01278	1.79376	1.51835	1.59182	1.82115	1.56611	1.51531	1.60058	1.2099	1.9595	1.88653	1.05938	1.70406	1.64302	1.42964	1.3461	1.83224	1.25127	1.64426	1.58716	1.46349	1.43173	1.89767	1.62097	2.15299	4.22802	1.53326	1.57691	1.59703	1.3613	1.93554	1.91952	1.57797	2.49609	1.53453	1.84555	1.32805	1.52804	2.12063	1.63482	1.4804	1.82555	1.88807	2.06633	1.04442	1.41999
3.45589	3.45589	3.45589	3.45589	3.45589	3.45589	3.45589	3.45589	3.45589	3.45589	3.45589	3.45589	3.45589	3.45589	3.45589	3.45589	3.45589	3.45589	3.45589	3.45589	3.45589	3.45589	3.45589	3.45589	3.45589	3.45589	3.45589	3.45589	3.45589	3.45589	3.45589	3.45589	3.45589	3.45589	3.45589	3.45589	3.45589	3.45589	3.45589	3.45589	3.45589	3.45589	3.45589	3.45589	3.45589	3.45589	3.45589	3.45589	3.45589	3.45589
0.0824629	0.0819961	0.0924892	0.0818014	0.0833351	0.0813754	0.0871428	0.0798232	0.0845974	0.0761267	0.0781892	0.0728654	0.0796449	0.0825426	0.0740835	0.0769216	0.0766158	0.0792659	0.0766562	0.0818086	0.0764829	0.0824261	0.0804381	0.0822427	0.0831437	0.0730268	0.0662295	0.0839352	0.0791613	0.0810619	0.0785972	0.0825544	0.0758476	0.0783472	0.0743061	0.0742048	0.082777	0.0796436	0.0780647	0.0848933	0.0841733	0.0905546	0.0869845	0.0792193	0.0775928	0.0782192	0.0783719	0.0753381	0.0781034	0.0734902
-0.0666011	-0.0673511	-0.0669027	-0.0634035	-0.0659283	-0.0676955	-0.0662127	-0.0676515	-0.0689672	-0.0643515	-0.0664074	-0.0686036	-0.0641344	-0.0669361	-0.0680982	-0.0664792	-0.0683008	-0.0696359	-0.0644795	-0.0654745	-0.0673982	-0.0662688	-0.0679224	-0.0705639	-0.0645417	-0.0669464	-0.0690728	-0.0644949	-0.068284	-0.0678656	-0.0668903	-0.0677374	-0.0690267	-0.0674767	-0.068606	-0.0694744	-0.0656757	-0.0649337	-0.067629	-0.0667721	-0.0645786	-0.0631554	-0.0671763	-0.0677925	-0.0657801	-0.0671928	-0.0694775	-0.0695603	-0.0662305	-0.0666231
0.104874	0.119111	0.110534	0.107067	0.100204	0.0893068	0.158987	0.174806	0.173288	0.0711401	0.0902278	0.108474	0.10918	0.122294	0.127729	0.093548	0.118168	0.110456	0.101047	0.124454	0.109431	0.105526	0.097168	0.083578	0.123055	0.129657	0.100805	0.102234	0.116277	0.128649	0.109605	0.12353	0.116811	0.118313	0.123985	0.116259	0.0883503	0.0808698	0.0955253	0.0590596	0.0905722	0.072688	0.0727672	0.0572643	0.0994844	0.0772888	0.0737568	0.0559622	0.0624253	0.0655357
-0.313736	-0.339459	-0.356466	-0.329041	-0.316822	-0.376552	-0.305474	-0.382545	-0.393023	-0.28228	-0.321919	-0.368699	-0.316135	-0.352999	-0.382043	-0.281032	-0.359611	-0.376015	-0.282844	-0.318529	-0.34584	-0.312055	-0.349546	-0.376509	-0.330188	-0.374276	-0.37172	-0.29588	-0.361846	-0.369681	-0.289726	-0.35247	-0.383672	-0.314718	-0.35827	-0.377274	-0.326719	-0.306893	-0.359735	-0.347879	-0.277567	-0.314103	-0.34025	-0.359758	-0.30509	-0.36838	-0.388584	-0.37906	-0.300158	-0.367999
0.255102	0.229888	0.236077	0.252634	0.196297	0.218637	0.228467	0.229885	0.232249	0.249126	0.246355	0.236304	0.220897	0.234443	0.216856	0.247317	0.209352	0.235532	0.235415	0.240398	0.231367	0.214316	0.231559	0.228911	0.234608	0.227936	0.223333	0.224552	0.236842	0.197919	0.266169	0.244915	0.249681	0.238522	0.250784	0.233088	0.231953	0.233796	0.22225	0.21257	0.232088	0.1965	0.198974	0.259958	0.2154	0.200422	0.209397	0.195952	0.23023	0.25604
-0.153247	-0.159574	-0.177648	-0.160831	-0.156286	-0.167368	-0.170639	-0.156634	-0.155765	-0.164389	-0.165139	-0.164478	-0.152893	-0.162513	-0.170241	-0.177985	-0.181367	-0.16189	-0.167954	-0.1649	-0.164101	-0.154654	-0.168239	-0.156689	-0.158572	-0.165114	-0.166725	-0.181076	-0.172883	-0.237558	-0.164517	-0.167582	-0.160012	-0.168525	-0.165924	-0.175296	-0.163475	-0.179122	-0.156015	-0.174807	-0.177151	-0.172355	-0.166807	-0.170182	-0.172862	-0.168186	-0.17063	-0.168069	-0.160038	-0.162876
1.88865	1.85006	1.7328	1.85959	1.89535	1.8257	1.90825	1.89703	1.85573	1.90943	1.85163	1.8437	1.88754	1.91445	1.88911	1.8937	1.86844	1.82257	1.8889	1.85037	1.8278	1.89698	1.92214	1.8909	1.90476	1.90497	1.84399	1.81421	1.86712	1.83203	1.8892	1.88543	1.88216	1.89914	1.91499	1.89156	1.86015	1.81775	1.70204	1.4397	1.8349	1.84811	1.56948	1.29371	1.86863	1.8315	1.64625	1.53524	1.91274	1.86086
0.892192	0.812695	0.962094	0.966338	0.914983	0.998125	0.878741	0.891831	0.862874	0.922479	0.802513	1.22345	0.858849	0.899632	0.95122	0.928783	0.923965	0.862739	0.898409	0.935584	0.871796	0.895591	0.855886	0.911968	0.865523	0.784626	0.854055	0.936834	0.94678	0.904876	0.905288	0.808699	1.16594	0.910846	0.852814	0.90748	0.892553	0.883589	0.875458	0.949398	1.01177	0.975505	0.939592	0.84916	0.878575	0.824839	0.865669	0.870264	0.849821	0.865345
-0.666207	-0.65846	-0.777263	-0.680527	-0.629227	-0.676946	-0.700562	-0.633023	-0.684901	-0.669806	-0.638133	-0.608421	-0.635898	-0.606741	-0.630354	-0.598808	-0.565852	-0.624051	-0.61523	-0.667882	-0.781221	-0.785777	-0.656889	-0.680277	-0.724567	-0.637795	-0.625672	-0.682035	-0.639893	-0.69927	-0.65839	-0.724739	-0.641571	-0.655412	-0.619191	-0.637119	-0.680049	-0.830696	-0.700458	-0.647818	-0.842255	-0.68521	-0.752861	-0.63164	-0.611985	-0.691288	-0.663529	-0.643872	-0.629108	-0.650979
-0.259939	-0.260195	-0.258647	-0.264354	-0.286633	-0.268799	-0.264779	-0.284227	-0.281831	-0.255822	-0.255861	-0.259166	-0.269731	-0.265927	-0.28092	-0.276924	-0.276001	-0.27405	-0.249668	-0.278475	-0.275847	-0.290964	-0.278622	-0.290887	-0.266927	-0.259484	-0.265284	-0.257387	-0.268379	-0.258512	-0.249456	-0.260404	-0.265581	-0.260726	-0.267444	-0.274264	-0.274195	-0.250327	-0.280949	-0.269755	-0.232906	-0.222314	-0.272097	-0.272623	-0.278962	-0.262549	-0.275062	-0.281074	-0.243125	-0.246482
-0.0587192	-0.0547562	-0.0665597	-0.0643964	-0.0579813	-0.0589129	-0.0577004	-0.0585255	-0.0592885	-0.0533848	-0.056448	-0.0535876	-0.0568261	-0.0514065	-0.0519724	-0.0549367	-0.0561885	-0.0566098	-0.0546442	-0.0598402	-0.0537943	-0.0617563	-0.061419	-0.0574289	-0.0577188	-0.0600327	-0.0569681	-0.0595064	-0.0527438	-0.0584152	-0.0593722	-0.0590387	-0.054831	-0.0591678	-0.0567369	-0.0561103	-0.0583919	-0.0564101	-0.0599898	-0.0602389	-0.0633312	-0.061748	-0.0645497	-0.0576942	-0.0565967	-0.0604897	-0.0548415	-0.0570158	-0.0530315	-0.0562553
0.503219	0.488967	0.490628	0.482374	0.48062	0.4885	0.501365	0.511032	0.504489	0.462667	0.467414	0.489513	0.489938	0.468067	0.484274	0.485296	0.495894	0.494864	0.477762	0.470482	0.486938	0.486147	0.494668	0.489861	0.454521	0.493801	0.507424	0.491923	0.52769	0.516043	0.487723	0.511508	0.49016	0.493871	0.488972	0.489192	0.508347	0.476897	0.50136	0.490768	0.487561	0.536831	0.55233	0.526288	0.516236	0.528768	0.551426	0.544328	0.490597	0.516015
0.149448	0.150826	0.169323	0.149576	0.159162	0.145155	0.15676	0.137782	0.138766	0.142196	0.144353	0.132509	0.151412	0.154744	0.14469	0.15434	0.141377	0.13737	0.143861	0.1607	0.153576	0.152092	0.146778	0.152627	0.15351	0.162125	0.145847	0.142789	0.17108	0.143554	0.147314	0.149635	0.147254	0.141198	0.14978	0.131724	0.144698	0.147883	0.148763	0.149932	0.166612	0.153382	0.164728	0.147288	0.138559	0.143558	0.146701	0.153971	0.140682	0.144505
-1.3063	-1.29115	-1.27133	-1.31594	-1.26877	-1.24869	-1.17488	-1.23387	-1.15947	-1.23389	-1.2427	-1.25642	-1.19776	-1.24447	-1.2297	-1.25053	-1.24988	-1.22511	-1.19609	-1.29397	-1.24246	-1.2904	-1.28744	-1.22006	-1.27603	-1.32027	-1.2488	-1.16379	-1.21238	-1.1793	-1.22555	-1.24473	-1.24787	-1.25476	-1.27132	-1.28101	-1.24399	-1.28895	-1.24931	-1.21548	-1.25479	-1.27539	-1.24314	-1.23527	-1.24114	-1.22643	-1.18763	-1.21741	-1.24207	-1.1966
0.727104	0.720983	0.740942	0.756527	0.741295	0.729841	0.744251	0.751533	0.722498	0.74218	0.745566	0.731037	0.772219	0.732582	0.761017	0.679499	0.787506	0.721694	0.768137	0.749419	0.722068	0.780277	0.708375	0.750534	0.744258	0.699343	0.739202	0.831668	0.763813	0.837341	0.716642	0.728403	0.725752	0.710326	0.70939	0.720543	0.735506	0.841647	0.70771	0.694921	0.774753	0.830546	0.735548	0.725052	0.749879	0.710656	0.731094	0.735891	0.674505	0.688683
-0.457908	-0.459813	-0.387827	-0.59652	-0.538995	-0.358526	-0.454954	-0.550974	-0.415279	-0.460879	-0.48593	-0.399498	-0.559906	-0.488616	-0.414112	-0.581191	-0.489953	-0.511642	-0.463936	-0.45419	-0.370853	-0.374598	-0.368117	-0.383383	-0.458304	-0.410843	-0.380306	-0.386884	-0.478518	-0.403185	-0.55996	-0.438558	-0.486028	-0.42839	-0.394996	-0.433072	-0.754482	-0.460501	-0.448223	-0.396475	-0.654952	-0.623946	-0.555279	-0.58681	-0.687034	-0.442897	-0.454351	-0.433982	-0.702609	-0.537386
-0.953132	-1.01924	-1.01671	-0.999605	-1.08411	-1.08001	-0.953537	-1.05327	-1.09396	-0.969902	-0.99632	-1.02668	-0.93279	-0.968821	-1.04674	-1.01725	-1.04716	-1.06878	-1.04381	-1.05035	-1.09868	-1.01203	-1.02108	-1.05219	-0.907008	-0.96742	-1.01655	-1.05763	-1.08008	-1.09593	-0.958395	-0.998253	-1.03737	-0.950032	-1.01816	-1.02325	-0.954269	-0.922081	-1.03544	-1.04529	-0.912993	-1.08202	-0.969887	-1.0533	-0.969941	-1.05809	-1.05702	-1.07217	-0.917135	-1.02832
0.150046	0.164887	0.166723	0.151535	0.150314	0.181141	0.158828	0.1562	0.194336	0.153435	0.179799	0.163546	0.166789	0.166882	0.191397	0.152003	0.163743	0.212569	0.146809	0.159509	0.19409	0.153041	0.157174	0.151175	0.161195	0.163622	0.195171	0.151845	0.173271	0.230285	0.147204	0.167585	0.173672	0.156385	0.17453	0.170919	0.151849	0.191844	0.209331	0.201963	0.162378	0.187516	0.204634	0.231802	0.141383	0.202426	0.193922	0.208818	0.1458	0.182744
3.9732	3.76529	3.77814	3.78871	3.77269	3.91017	4.12994	3.86508	3.91223	4.02996	3.83307	4.25173	4.00627	4.0231	4.02208	3.86215	3.94663	3.76516	4.05422	3.875	3.72924	3.87377	3.8908	3.90969	3.93661	3.83281	3.93083	4.08719	4.00291	3.95792	3.97137	3.84463	4.1372	4.04363	3.97479	3.86398	3.63082	3.84989	3.63864	3.51457	3.82016	3.84728	3.54888	3.19056	3.75223	3.70806	3.63135	3.50944	3.72729	3.79558
-1.25281	-1.25281	-1.25281	-1.25281	-1.25281	-1.25281	-1.25281	-1.25281	-1.25281	-1.25281	-1.25281	-1.25281	-1.25281	-1.25281	-1.25281	-1.25281	-1.25281	-1.25281	-1.25281	-1.25281	-1.25281	-1.25281	-1.25281	-1.25281	-1.25281	-1.25281	-1.25281	-1.25281	-1.25281	-1.25281	-1.25281	-1.25281	-1.25281	-1.25281	-1.25281	-1.25281	-1.25281	-1.25281	-1.25281	-1.25281	-1.25281	-1.25281	-1.25281	-1.25281	-1.25281	-1.25281	-1.25281	-1.25281	-1.25281	-1.25281
2.11713	2.10515	2.37455	2.10015	2.13953	2.08921	2.23728	2.04936	2.17193	1.95446	2.00741	1.87073	2.04479	2.11918	1.902	1.97487	1.96702	2.03505	1.96805	2.10034	1.96361	2.11619	2.06515	2.11148	2.13461	1.87487	1.70036	2.15493	2.03237	2.08116	2.01789	2.11948	1.9473	2.01147	1.90772	1.90512	2.1252	2.04475	2.00421	2.17953	2.16105	2.32488	2.23322	2.03386	1.9921	2.00818	2.0121	1.93421	2.00521	1.88677
-0.772978	-0.779883	-0.796796	-0.788781	-0.721048	-0.776555	-0.837942	-0.721132	-0.719691	-0.693131	-0.742252	-0.888932	-0.689732	-0.744746	-0.888319	-0.708822	-0.711167	-0.878235	-0.716394	-0.679849	-0.69658	-0.745333	-0.738112	-0.782246	-0.656336	-0.718296	-0.84577	-0.757488	-0.771927	-0.877718	-0.759842	-0.776322	-0.849384	-0.731329	-0.718485	-0.797446	-0.736038	-0.788112	-0.715199	-0.73717	-0.783491	-0.727973	-0.81215	-0.740949	-0.692788	-0.772409	-0.676991	-0.671254	-0.704965	-0.676673
-0.0235695	-0.022821	-0.0244947	-0.0240247	-0.0240352	-0.0222131	-0.0247746	-0.023502	-0.0241495	-0.0262105	-0.0259857	-0.0265585	-0.025089	-0.0229459	-0.0272549	-0.0234919	-0.0248681	-0.0241708	-0.0237642	-0.0250987	-0.0248256	-0.0248964	-0.0247116	-0.0257036	-0.0272602	-0.0225172	-0.0230512	-0.0238461	-0.0276751	-0.0245898	-0.0226304	-0.0241486	-0.0229184	-0.0230668	-0.0233977	-0.0263074	-0.0237041	-0.0259987	-0.02343	-0.0253163	-0.0248903	-0.0231175	-0.0234607	-0.0244234	-0.0235045	-0.0227591	-0.0241146	-0.0235727	-0.0229727	-0.0226693
-0.887842	-0.869069	-0.872668	-0.950608	-0.94547	-0.947882	-0.86355	-0.823304	-0.880773	-0.865222	-0.870923	-1.20076	-0.840908	-0.85649	-1.04843	-0.878617	-0.839143	-0.946416	-0.90683	-0.843827	-0.824113	-0.979564	-0.902534	-0.880645	-0.955487	-1.01896	-0.89975	-0.959605	-0.86939	-0.885753	-0.864945	-0.866186	-0.950643	-0.855973	-0.858482	-0.883437	-0.92631	-0.905374	-0.837963	-0.897347	-0.915495	-1.03267	-0.869937	-0.890133	-0.862815	-0.845796	-0.849623	-0.826248	-0.839689	-0.811701
0.365173	0.355271	0.31536	0.267062	0.249222	0.34183	0.418872	0.390058	0.40005	0.328514	0.327213	0.368925	0.3965	0.330493	0.30657	0.331975	0.30296	0.352316	0.297278	0.330965	0.313067	0.345925	0.396556	0.29662	0.286105	0.315572	0.340672	0.359666	0.389633	0.273201	0.384596	0.366417	0.359813	0.339779	0.359053	0.335711	0.284615	0.382945	0.269435	0.268318	0.269061	0.281576	0.268074	0.2719	0.344637	0.258818	0.262472	0.247445	0.265359	0.261487
0.187184	0.170506	0.20185	0.20274	0.191966	0.209409	0.184362	0.187109	0.181033	0.193538	0.168369	0.256684	0.180189	0.188745	0.199569	0.194861	0.19385	0.181005	0.188489	0.196288	0.182905	0.187897	0.179567	0.191333	0.181589	0.164617	0.179183	0.19655	0.198637	0.189845	0.189932	0.169667	0.244617	0.191098	0.178923	0.190392	0.18726	0.185379	0.183674	0.199186	0.212272	0.204664	0.197129	0.178156	0.184327	0.173054	0.18162	0.182584	0.178295	0.181552
0.536912	0.530668	0.626414	0.548452	0.507109	0.545567	0.564599	0.510168	0.551978	0.539812	0.514286	0.490341	0.512485	0.488987	0.508017	0.482593	0.456033	0.502937	0.495828	0.538261	0.629604	0.633275	0.529402	0.548251	0.583945	0.514014	0.504244	0.549668	0.515704	0.563558	0.530611	0.584084	0.517057	0.528212	0.499021	0.513469	0.548067	0.669477	0.564516	0.522091	0.678792	0.552226	0.606748	0.509053	0.493213	0.557125	0.534753	0.518911	0.507013	0.524639
1.39763	1.3033	1.58425	1.53275	1.38006	1.40224	1.37338	1.39301	1.41118	1.27066	1.34357	1.27548	1.35257	1.22357	1.23704	1.3076	1.33739	1.34742	1.30063	1.42431	1.2804	1.46992	1.46189	1.36691	1.37381	1.42889	1.35595	1.41636	1.2554	1.39039	1.41317	1.40523	1.30508	1.4083	1.35044	1.33553	1.38984	1.34267	1.42787	1.4338	1.5074	1.46972	1.5364	1.37323	1.34711	1.43977	1.30533	1.35708	1.26225	1.33898
-0.0313137	-0.0287346	-0.0308076	-0.0305476	-0.0254191	-0.0279616	-0.031763	-0.0297864	-0.0281918	-0.0331548	-0.0312579	-0.0307051	-0.0311708	-0.0309258	-0.0288696	-0.0341806	-0.0306561	-0.0293288	-0.029741	-0.028409	-0.028276	-0.0306448	-0.027771	-0.031491	-0.0281314	-0.030464	-0.027335	-0.0317807	-0.0298787	-0.028774	-0.0319534	-0.0301958	-0.0304156	-0.0303656	-0.0299839	-0.0288407	-0.0339151	-0.0318561	-0.0299371	-0.0291076	-0.0363888	-0.0283363	-0.0313799	-0.0305134	-0.0303483	-0.031121	-0.0292796	-0.0302201	-0.0313305	-0.0299966
1.12607	1.1242	1.03664	1.29916	0.930725	0.838611	1.25602	1.32013	1.23516	1.11511	1.05128	0.959762	1.27813	1.0885	1.23338	1.18609	1.13592	1.09843	1.1535	1.18592	1.1378	1.1624	1.08045	1.08046	1.19574	1.27494	1.13967	1.14518	1.10705	1.22865	1.2013	1.28033	1.16701	1.16026	1.15167	1.23259	1.24456	0.940734	1.07798	0.932589	0.89079	1.10872	0.917159	1.07404	1.07517	1.22644	0.967734	1.00093	1.08114	1.05542
0.496855	0.505709	0.554174	0.538384	0.512602	0.502411	0.443886	0.789805	0.663396	0.461156	0.473147	0.717827	0.518673	0.496179	0.700805	0.465135	0.48045	0.675084	0.498095	0.498676	0.498453	0.482135	0.457542	0.696918	0.507356	0.495152	0.893781	0.543361	0.572243	0.872057	0.477648	0.496041	0.651113	0.484463	0.509255	0.839182	0.514321	0.613106	0.500202	0.495043	0.551483	0.542178	0.555495	0.510791	0.466242	0.477815	0.488688	0.466589	0.474772	0.46336
-0.000351257	-0.000378029	-0.000409801	-0.000379575	-0.000362873	-0.000409369	-0.000357766	-0.000424214	-0.000417864	-0.000357714	-0.000343758	-0.000504864	-0.000328666	-0.000356857	-0.000463572	-0.00033987	-0.000363057	-0.000431435	-0.000377042	-0.00033647	-0.000360405	-0.0003545	-0.000351116	-0.000494989	-0.000367946	-0.000377796	-0.000498988	-0.000364492	-0.000398522	-0.000594993	-0.000354093	-0.000381701	-0.000486518	-0.000339867	-0.000418197	-0.000619093	-0.000354222	-0.000378304	-0.000362131	-0.000371259	-0.000468241	-0.000401443	-0.000377379	-0.000365097	-0.000342263	-0.000364697	-0.000346027	-0.000354182	-0.000352188	-0.000360779
0.0444109	0.0456807	0.0525769	0.0501558	0.0499128	0.0464328	0.0438824	0.0454374	0.0451124	0.0466547	0.0483603	0.0453433	0.0465819	0.0499556	0.0431477	0.0462906	0.0461739	0.0463024	0.0474424	0.0475123	0.0477479	0.0494034	0.0431171	0.0464638	0.0460006	0.0434233	0.0475958	0.047428	0.04491	0.0494817	0.0462784	0.0454929	0.0502521	0.0449125	0.0446255	0.0462974	0.0462964	0.0505734	0.0484994	0.0410459	0.050562	0.0473711	0.0476598	0.046055	0.0440837	0.044601	0.0440639	0.0422757	0.0432874	0.0439911
-0.7219	-0.657425	-0.627722	-0.591726	-0.617926	-0.585327	-0.624955	-0.749085	-0.649235	-0.619922	-0.661571	-0.685606	-0.719781	-0.632981	-0.771939	-0.615611	-0.56173	-0.632391	-0.59615	-0.562507	-0.730292	-0.610079	-0.596086	-0.665785	-0.567092	-0.595621	-0.559388	-0.562539	-0.584223	-0.567104	-0.691346	-0.604498	-0.590651	-0.670792	-0.573501	-0.726429	-0.599915	-0.581044	-0.767462	-0.603028	-0.995941	-0.714678	-0.636772	-0.657851	-0.728403	-0.653251	-0.645258	-0.623125	-0.713686	-0.609447
2.58061	2.52937	3.1401	2.89999	2.37406	2.36256	2.88613	3.08505	3.10458	2.4191	2.3485	1.89922	2.77009	2.44436	2.11244	2.47554	2.49906	2.47477	2.42325	2.92943	2.49634	2.80346	2.6713	2.69927	2.82169	2.47244	2.55286	2.82472	2.57965	3.01101	2.63755	2.91221	2.54493	2.60382	2.54363	2.6824	2.76712	2.64406	2.44922	2.52645	2.31193	2.75135	2.73501	2.40004	2.35587	2.6073	2.31834	2.32245	2.25152	2.35254
-0.579405	-0.579405	-0.579405	-0.579405	-0.579405	-0.579405	-0.579405	-0.579405	-0.579405	-0.579405	-0.579405	-0.579405	-0.579405	-0.579405	-0.579405	-0.579405	-0.579405	-0.579405	-0.579405	-0.579405	-0.579405	-0.579405	-0.579405	-0.579405	-0.579405	-0.579405	-0.579405	-0.579405	-0.579405	-0.579405	-0.579405	-0.579405	-0.579405	-0.579405	-0.579405	-0.579405	-0.579405	-0.579405	-0.579405	-0.579405	-0.579405	-0.579405	-0.579405	-0.579405	-0.579405	-0.579405	-0.579405	-0.579405	-0.579405	-0.579405
0.289533	0.275929	0.240818	0.26302	0.275696	0.268899	0.269866	0.288431	0.281493	0.278574	0.278883	0.262186	0.284411	0.279232	0.278097	0.279182	0.277088	0.269049	0.273651	0.265517	0.264388	0.263204	0.288544	0.276936	0.275076	0.265229	0.267422	0.280366	0.267628	0.26293	0.275777	0.27688	0.2691	0.27083	0.276123	0.269193	0.280459	0.266774	0.268792	0.244862	0.260099	0.280237	0.246389	0.27013	0.297072	0.283869	0.28336	0.284938	0.289548	0.280312
0.280025	0.229008	0.263095	0.25754	0.247394	0.258383	0.251375	0.232548	0.255155	0.275078	0.235473	0.330233	0.25892	0.276116	0.290973	0.288442	0.242737	0.298776	0.255417	0.264455	0.266297	0.293989	0.256919	0.281074	0.227271	0.237721	0.308426	0.265573	0.253528	0.303864	0.250186	0.255007	0.295198	0.281383	0.239861	0.278633	0.345383	0.27007	0.301862	0.320374	0.339261	0.27079	0.300688	0.257934	0.345956	0.295019	0.273658	0.30536	0.341684	0.308027
3.71534	3.46458	4.21143	4.07455	3.66865	3.72759	3.65087	3.70308	3.75135	3.37781	3.57163	3.39064	3.59555	3.25264	3.28845	3.47601	3.55521	3.58186	3.4575	3.78627	3.40372	3.9075	3.88616	3.63369	3.65203	3.79845	3.60454	3.76514	3.33725	3.6961	3.75665	3.73555	3.46932	3.74372	3.58991	3.55026	3.69463	3.56923	3.79573	3.81149	4.00715	3.90698	4.08425	3.65048	3.58104	3.82736	3.46998	3.60756	3.35546	3.55943
-0.820099	-0.817435	-0.918031	-0.824169	-0.89619	-0.85023	-0.843589	-1.22195	-1.25303	-0.807335	-0.863439	-1.33842	-0.941714	-0.840761	-0.982835	-0.817722	-0.838536	-1.09638	-0.808081	-0.9133	-0.826928	-0.811526	-0.784775	-0.955887	-0.846418	-0.843271	-1.1265	-0.807207	-1.1623	-1.39703	-0.745432	-0.973515	-0.980566	-0.823297	-0.921232	-1.1683	-0.85159	-0.882459	-0.855844	-0.809181	-0.867035	-0.974787	-0.906871	-0.806063	-0.80404	-1.02993	-0.817285	-0.900205	-0.78444	-0.731123
-0.159492	-0.161535	-0.162225	-0.167994	-0.189952	-0.163751	-0.154371	-0.168578	-0.17394	-0.192322	-0.159546	-0.174128	-0.164335	-0.175408	-0.175859	-0.164725	-0.162535	-0.161515	-0.178327	-0.164456	-0.168098	-0.163784	-0.175209	-0.172801	-0.160302	-0.171635	-0.17077	-0.173439	-0.17885	-0.305544	-0.162051	-0.201628	-0.16496	-0.173269	-0.21142	-0.200726	-0.187721	-0.173247	-0.174306	-0.190004	-0.159583	-0.174027	-0.175547	-0.165549	-0.201273	-0.161756	-0.165922	-0.167609	-0.169959	-0.160862
-0.0336431	-0.04898	-0.0470438	-0.0352276	-0.0508067	-0.0543693	-0.0464035	-0.0539326	-0.0567899	-0.0421782	-0.054467	-0.0592612	-0.0418029	-0.0553326	-0.057484	-0.0453941	-0.0563304	-0.0596663	-0.0542972	-0.0616429	-0.0646364	-0.0280986	-0.0485755	-0.0515157	-0.0335959	-0.0552012	-0.0589515	-0.0505995	-0.0605531	-0.0606472	-0.041026	-0.0505848	-0.0546933	-0.0359362	-0.0469857	-0.052343	-0.0359279	-0.0528222	-0.0543709	-0.0472106	-0.0245564	-0.0593965	-0.0590534	-0.0485605	-0.0295976	-0.0580958	-0.0528407	-0.0505584	-0.0417761	-0.0628862
-0.525262	-0.525152	-0.573085	-0.591023	-0.604417	-0.512835	-0.59294	-0.565618	-0.572483	-0.513515	-0.506912	-0.490627	-0.552936	-0.515277	-0.522787	-0.46557	-0.518484	-0.512935	-0.499519	-0.497971	-0.511552	-0.513008	-0.49511	-0.526587	-0.525259	-0.545485	-0.527258	-0.542321	-0.525407	-0.534522	-0.495851	-0.525858	-0.492774	-0.594035	-0.501166	-0.489711	-0.555445	-0.534379	-0.52439	-0.505308	-0.558157	-0.59982	-0.602787	-0.514752	-0.51664	-0.495249	-0.528585	-0.522651	-0.501693	-0.4916
-0.227146	-0.230922	-0.198974	-0.210563	-0.19975	-0.227132	-0.230424	-0.241334	-0.217505	-0.200332	-0.211331	-0.194847	-0.224654	-0.225721	-0.219075	-0.223876	-0.204561	-0.207611	-0.198909	-0.209182	-0.206567	-0.20434	-0.200063	-0.207661	-0.275062	-0.209148	-0.232296	-0.250929	-0.200613	-0.275427	-0.200092	-0.193224	-0.212777	-0.20506	-0.202191	-0.197411	-0.253447	-0.187844	-0.197889	-0.204391	-0.206302	-0.200382	-0.248882	-0.192058	-0.202787	-0.225173	-0.226161	-0.194902	-0.196456	-0.195184
1.24479	1.36058	1.4136	1.37075	1.25817	1.30331	1.13266	1.33274	1.22168	1.39616	1.4269	1.32341	1.16776	1.37351	1.38488	1.35386	1.38449	1.36305	1.25518	1.28619	1.37532	1.20794	1.17814	1.26832	1.2641	1.44922	1.38603	1.42056	1.38788	1.16798	1.38402	1.48782	1.47629	1.43496	1.37301	1.36849	1.27024	1.16183	1.45065	1.30948	1.00619	1.3254	1.40869	1.49793	1.27897	1.21311	1.31362	1.47153	1.20354	1.3191
3.18464	2.96667	3.65017	3.55748	2.92938	3.17046	2.85764	2.72598	2.65653	2.99253	3.13778	2.46978	2.8018	2.78959	2.70495	3.1008	3.09968	2.89523	2.9232	3.17647	2.95254	3.37247	3.32663	2.96616	2.99844	3.34647	2.87123	3.32774	2.53916	2.2783	3.44278	3.23104	3.02473	3.31989	3.0165	2.77867	3.12718	2.85775	3.43083	3.3507	3.21766	3.19559	3.46747	3.37008	3.16929	3.06975	2.97043	3.25405	2.9165	3.24581
-0.836071	-0.836071	-0.836071	-0.836071	-0.836071	-0.836071	-0.836071	-0.836071	-0.836071	-0.836071	-0.836071	-0.836071	-0.836071	-0.836071	-0.836071	-0.836071	-0.836071	-0.836071	-0.836071	-0.836071	-0.836071	-0.836071	-0.836071	-0.836071	-0.836071	-0.836071	-0.836071	-0.836071	-0.836071	-0.836071	-0.836071	-0.836071	-0.836071	-0.836071	-0.836071	-0.836071	-0.836071	-0.836071	-0.836071	-0.836071	-0.836071	-0.836071	-0.836071	-0.836071	-0.836071	-0.836071	-0.836071	-0.836071	-0.836071	-0.836071
0.919438	0.927651	0.947769	0.938235	0.857668	0.923693	0.996711	0.857769	0.856054	0.824462	0.882889	1.05736	0.820418	0.885857	1.05663	0.843125	0.845915	1.04464	0.852133	0.808663	0.828564	0.886555	0.877965	0.930462	0.780695	0.854394	1.00602	0.901012	0.918187	1.04402	0.903813	0.923416	1.01032	0.869897	0.85462	0.948541	0.875498	0.93744	0.850711	0.876845	0.931943	0.865906	0.966032	0.88134	0.824054	0.918761	0.805264	0.79844	0.838538	0.804886
0.373611	0.36033	0.445008	0.38748	0.386854	0.422931	0.405571	0.358919	0.370926	0.38924	0.380122	0.36718	0.370316	0.394901	0.390845	0.348361	0.381971	0.410276	0.359687	0.434478	0.435301	0.364674	0.377762	0.357129	0.488847	0.4568	0.477092	0.426853	0.367358	0.369993	0.382508	0.387208	0.428384	0.353334	0.381501	0.397221	0.354812	0.412858	0.449584	0.530938	0.463617	0.41059	0.393421	0.569639	0.379657	0.369389	0.470905	0.537756	0.381837	0.358701
0.168684	0.222413	0.193721	0.19117	0.201124	0.21126	0.181214	0.199042	0.28366	0.162685	0.247109	0.26453	0.187587	0.191292	0.222488	0.174899	0.252287	0.254452	0.180897	0.286482	0.25833	0.188386	0.20699	0.21497	0.187452	0.212551	0.307101	0.211256	0.309022	0.298112	0.181295	0.214386	0.252457	0.180756	0.27478	0.2366	0.188084	0.254341	0.195319	0.235473	0.185022	0.209979	0.254955	0.210485	0.173535	0.252342	0.26296	0.19619	0.169088	0.263318
-0.165664	-0.157326	-0.188722	-0.18834	-0.166887	-0.160606	-0.175133	-0.163158	-0.173658	-0.182624	-0.163779	-0.166127	-0.183957	-0.174582	-0.16694	-0.185751	-0.173139	-0.16238	-0.172639	-0.180938	-0.166236	-0.178065	-0.181938	-0.160186	-0.172186	-0.178063	-0.17965	-0.173175	-0.171095	-0.170567	-0.160703	-0.15818	-0.164689	-0.171651	-0.156841	-0.192119	-0.180245	-0.178284	-0.162148	-0.167424	-0.180404	-0.189042	-0.18085	-0.177454	-0.172361	-0.163734	-0.167637	-0.170612	-0.172212	-0.168261
-1.14357	-1.11859	-0.984095	-0.676785	-0.866109	-1.12477	-0.791364	-0.78365	-0.714726	-0.72196	-0.839718	-1.04342	-1.0219	-1.09847	-0.917867	-0.810144	-0.919524	-1.00583	-0.852148	-1.41362	-0.873798	-0.69605	-1.01742	-0.778141	-1.11977	-0.978112	-1.39169	-0.669052	-0.865036	-0.805925	-0.770212	-1.18544	-0.90832	-1.0846	-0.851566	-0.973751	-0.895591	-1.02888	-1.15331	-1.2375	-0.779027	-1.20134	-1.01683	-1.03932	-1.1255	-1.44302	-1.3242	-1.1899	-0.815962	-1.09998
-0.217515	-0.220913	-0.241662	-0.219444	-0.22165	-0.260534	-0.229361	-0.311101	-0.348541	-0.210611	-0.205613	-0.324303	-0.22616	-0.210345	-0.290219	-0.22693	-0.208657	-0.329696	-0.260313	-0.235642	-0.254743	-0.207061	-0.21364	-0.239581	-0.216799	-0.221213	-0.423742	-0.377197	-0.454439	-0.575973	-0.204458	-0.215005	-0.331659	-0.212455	-0.27505	-0.443032	-0.212356	-0.265957	-0.208378	-0.214782	-0.223389	-0.227529	-0.315947	-0.217644	-0.222927	-0.212767	-0.213899	-0.19883	-0.205181	-0.208062
-0.385495	-0.351147	-0.415699	-0.417532	-0.395343	-0.431266	-0.379683	-0.385339	-0.372828	-0.398581	-0.346747	-0.528626	-0.371088	-0.38871	-0.411	-0.401306	-0.399223	-0.372769	-0.388182	-0.404244	-0.376683	-0.386964	-0.369808	-0.39404	-0.373972	-0.339019	-0.369017	-0.404784	-0.409081	-0.390976	-0.391154	-0.34942	-0.503774	-0.393555	-0.368481	-0.392101	-0.385651	-0.381778	-0.378265	-0.410213	-0.437162	-0.421493	-0.405976	-0.366902	-0.379612	-0.356394	-0.374035	-0.376021	-0.367188	-0.373895
0.243877	0.246245	0.276165	0.24847	0.243564	0.247602	0.227567	0.236078	0.234425	0.24222	0.227915	0.230646	0.239666	0.236036	0.232139	0.230655	0.241757	0.221663	0.247493	0.248868	0.232851	0.244174	0.237265	0.239938	0.251171	0.238023	0.236398	0.246768	0.240379	0.235794	0.230649	0.234025	0.229582	0.234987	0.2266	0.231568	0.243183	0.257452	0.24707	0.247469	0.270412	0.247202	0.251382	0.250708	0.235557	0.245333	0.245437	0.252872	0.229048	0.230107
2.21262	2.34314	2.68471	2.42928	2.47909	2.63116	2.36663	2.40286	2.32838	2.52255	2.37278	2.30219	2.39095	2.34595	2.39867	2.25269	2.29382	2.49417	2.57525	2.55113	2.44016	2.4944	2.43163	2.43575	2.55806	2.39067	2.53039	2.5327	2.2926	2.4249	2.43212	2.43152	2.28937	2.33996	2.19268	2.41803	2.50395	2.54131	2.61616	2.46511	2.50786	2.53565	2.52265	2.38404	2.3621	2.53838	2.4631	2.51302	2.27316	2.38618
0.397389	0.38664	0.30631	0.361894	0.356344	0.337335	0.38599	0.374588	0.335353	0.35551	0.345473	0.36844	0.35278	0.374598	0.371343	0.33839	0.380952	0.381561	0.373115	0.319999	0.324492	0.338115	0.385338	0.39679	0.363421	0.386586	0.381301	0.327568	0.357523	0.37928	0.365251	0.392804	0.393539	0.363499	0.378654	0.385735	0.35173	0.365318	0.377456	0.378483	0.338508	0.341845	0.365488	0.39627	0.349032	0.359076	0.357205	0.372301	0.357622	0.339855
1.4218	1.45174	1.61354	1.57161	1.55532	1.47846	1.49961	1.44077	1.48105	1.47129	1.4863	1.40671	1.5441	1.5628	1.41799	1.52737	1.49368	1.50105	1.54762	1.51762	1.53667	1.55357	1.42825	1.475	1.49386	1.39358	1.47291	1.50096	1.60933	1.65199	1.47911	1.42133	1.48872	1.46578	1.37589	1.47724	1.48078	1.5888	1.57923	1.52396	1.52383	1.67881	1.62612	1.58755	1.45868	1.51445	1.48171	1.51077	1.46116	1.44095
0.834542	0.893581	1.00612	0.942674	0.898653	0.871699	0.953581	0.843268	0.800419	0.878174	0.827775	0.923455	0.980319	0.900659	0.926209	0.87931	0.85538	0.865041	0.978293	0.922267	0.918509	0.891429	0.838429	0.907497	0.904098	0.87503	0.913149	0.951238	0.925123	1.07829	0.817727	0.943143	0.885415	0.863937	0.865391	0.858125	0.907775	0.987837	0.870087	0.961398	0.966045	1.0193	0.981528	0.992343	0.861334	0.875212	0.924269	0.942697	0.86421	0.833663
-1.0564	-1.08138	-1.11756	-1.12562	-1.09423	-1.06219	-1.12878	-1.10557	-1.13057	-1.14714	-1.11329	-1.1753	-1.13069	-1.1801	-1.14236	-1.26553	-1.12911	-1.07271	-1.17954	-1.19308	-1.10861	-1.18369	-1.14573	-1.14639	-1.16107	-1.10224	-1.12139	-1.22276	-1.05826	-1.12373	-1.10975	-1.08425	-1.12053	-1.19075	-1.04844	-1.12071	-1.16507	-1.25712	-1.08671	-1.09258	-1.2343	-1.1715	-1.09616	-1.11145	-1.14588	-1.14511	-1.18237	-1.15008	-1.12442	-1.11114
-0.809761	-0.862372	-0.94806	-0.990366	-0.96804	-0.960971	-0.974037	-0.96508	-0.92885	-0.855699	-0.890675	-0.838592	-0.97223	-0.901031	-0.881555	-0.967445	-0.933434	-0.906769	-0.968498	-0.91318	-0.878722	-0.882691	-0.912721	-0.857991	-0.894287	-0.855184	-0.864665	-0.989499	-0.960812	-0.927522	-0.859924	-0.871828	-0.933921	-0.905027	-0.876959	-0.911389	-0.922997	-0.932028	-0.92171	-0.914018	-0.973131	-0.960334	-0.942366	-0.913353	-0.857723	-0.846035	-0.892177	-0.877365	-0.88023	-0.875317
0.544962	0.586065	0.547727	0.556374	0.570573	0.53599	0.568071	0.667024	0.635328	0.706377	0.586826	0.667332	0.653176	0.589568	0.61675	0.634558	0.567682	0.55337	0.661777	0.593894	0.719425	0.584562	0.575172	0.600657	0.536656	0.568776	0.585842	0.618319	0.543025	0.674367	0.532679	0.627112	0.734284	0.572397	0.6315	0.613804	0.558221	0.589919	0.538361	0.572194	0.522787	0.74742	0.581172	0.570851	0.521238	0.861964	0.816113	0.735846	0.669609	0.761756
2.50244	2.79001	3.28921	3.17303	3.00087	2.82373	3.07052	2.83035	2.82034	3.19983	2.9613	2.67541	2.79721	2.69234	2.98706	2.53617	2.71429	3.04	3.11888	2.50663	3.19944	3.17527	2.68146	3.1458	2.7901	2.86651	2.72398	3.04413	2.80775	3.32599	2.99287	2.87475	2.91311	2.45044	2.7682	2.69769	2.86605	3.05515	2.9774	2.91929	3.04654	3.04939	3.14855	3.18103	2.42512	2.93179	2.83657	3.06102	2.84301	2.74669
-1.73758	-1.73758	-1.73758	-1.73758	-1.73758	-1.73758	-1.73758	-1.73758	-1.73758	-1.73758	-1.73758	-1.73758	-1.73758	-1.73758	-1.73758	-1.73758	-1.73758	-1.73758	-1.73758	-1.73758	-1.73758	-1.73758	-1.73758	-1.73758	-1.73758	-1.73758	-1.73758	-1.73758	-1.73758	-1.73758	-1.73758	-1.73758	-1.73758	-1.73758	-1.73758	-1.73758	-1.73758	-1.73758	-1.73758	-1.73758	-1.73758	-1.73758	-1.73758	-1.73758	-1.73758	-1.73758	-1.73758	-1.73758	-1.73758	-1.73758
0.912337	1.31565	1.03479	0.980939	1.28502	1.19874	0.908205	1.28734	1.24071	1.03588	1.26018	1.37549	1.06364	1.2028	1.26878	1.08239	1.27504	1.32461	1.09991	1.4133	1.30884	0.985344	1.03805	1.18502	1.09105	1.27995	1.40553	1.0801	1.34652	1.54376	1.13766	1.15027	1.28524	1.12069	1.19082	1.37178	0.850613	1.32519	1.31208	1.20634	0.833639	1.21811	1.39782	0.981164	0.970662	1.24743	1.0464	1.0345	1.14851	1.1956
-0.826817	-0.872767	-0.835848	-0.843405	-0.933468	-0.90068	-0.791068	-0.918748	-0.942581	-0.725884	-0.843674	-0.929029	-0.740147	-0.877732	-0.902664	-0.806046	-0.893159	-0.936832	-0.781268	-0.944055	-0.915252	-0.890258	-0.932554	-0.937808	-0.756913	-0.957327	-0.993852	-0.809677	-0.892479	-0.927484	-0.800808	-0.873094	-0.946732	-0.766119	-0.899103	-0.909489	-0.834406	-0.845974	-0.838882	-0.740729	-0.751032	-0.717085	-0.910864	-0.916685	-0.692897	-0.861516	-0.94033	-0.900719	-0.74487	-0.847288
-0.60385	-0.550045	-0.651161	-0.654034	-0.619276	-0.675547	-0.594746	-0.603606	-0.584008	-0.624349	-0.543154	-0.828054	-0.581283	-0.608885	-0.643801	-0.628616	-0.625354	-0.583916	-0.608058	-0.633218	-0.590046	-0.606151	-0.579278	-0.617235	-0.5858	-0.531048	-0.578039	-0.634064	-0.640796	-0.612435	-0.612714	-0.547341	-0.789125	-0.616476	-0.577199	-0.614197	-0.604094	-0.598027	-0.592525	-0.642568	-0.684782	-0.660238	-0.635931	-0.574726	-0.594634	-0.558265	-0.585899	-0.589009	-0.575173	-0.58568
-0.535599	-0.52043	-0.522198	-0.513412	-0.511545	-0.519933	-0.533625	-0.543915	-0.536951	-0.492438	-0.49749	-0.521011	-0.521464	-0.498185	-0.515435	-0.516523	-0.527802	-0.526707	-0.508504	-0.500756	-0.51827	-0.517428	-0.526498	-0.521381	-0.483768	-0.525575	-0.540075	-0.523576	-0.561644	-0.549248	-0.519106	-0.544422	-0.5217	-0.52565	-0.520435	-0.52067	-0.541057	-0.507584	-0.53362	-0.522347	-0.518934	-0.571374	-0.58787	-0.560152	-0.549453	-0.562792	-0.586908	-0.579353	-0.522165	-0.549219
0.919691	0.838124	0.850518	0.796202	0.940496	0.77911	0.946241	0.985369	0.779531	1.05339	0.868384	0.909288	0.933328	1.16692	0.808465	0.989469	1.01384	0.772853	0.946003	0.79505	0.786964	0.835454	0.843214	0.835644	1.02833	0.851746	0.809184	0.997343	0.946604	0.791378	1.20853	0.993135	0.765978	1.05108	0.921419	0.992777	0.829257	0.822576	0.750606	0.837208	0.91257	0.893072	0.873679	0.802741	1.09011	0.804771	0.794575	0.763095	0.899263	0.822574
0.300909	0.345256	0.380252	0.348915	0.330302	0.301754	0.267434	0.380574	0.294468	0.324485	0.308393	0.318265	0.333766	0.288052	0.300133	0.31394	0.31758	0.311884	0.28468	0.274383	0.304876	0.319449	0.281605	0.311639	0.290552	0.332123	0.302383	0.260422	0.292673	0.321846	0.275205	0.322623	0.302181	0.31511	0.297434	0.261928	0.29584	0.334461	0.299087	0.319039	0.340643	0.326914	0.319419	0.349054	0.284512	0.287047	0.299058	0.298207	0.308664	0.2782
0.0701896	0.0712036	0.0531035	0.0598463	0.0684047	0.0670813	0.0646446	0.0773381	0.0787753	0.0766321	0.0682558	0.0815868	0.0659436	0.0743133	0.0765913	0.0716364	0.0776335	0.081215	0.0738855	0.0556436	0.0732905	0.0771118	0.0823095	0.0692455	0.0701482	0.0694184	0.0793354	0.0646232	0.0843593	0.0930757	0.0587602	0.066796	0.0718732	0.0817083	0.0812973	0.0766023	0.0624456	0.0568137	0.0662429	0.0614009	0.052775	0.0666138	0.0673756	0.067095	0.0675044	0.0691431	0.0746103	0.0667159	0.0799737	0.0793864
0.482194	0.479542	0.470503	0.479591	0.477714	0.477394	0.481652	0.479963	0.479316	0.476846	0.477721	0.474319	0.478623	0.477546	0.474566	0.482917	0.47943	0.479737	0.480257	0.478969	0.480094	0.478786	0.476838	0.480924	0.472469	0.47325	0.475431	0.477065	0.480697	0.474722	0.482578	0.480568	0.479259	0.480718	0.479958	0.476841	0.480418	0.471658	0.472084	0.473808	0.472258	0.47313	0.473098	0.472915	0.484579	0.479413	0.481725	0.481818	0.485368	0.480916
1.45997	1.45342	1.43074	1.45251	1.43761	1.43274	1.46066	1.44608	1.45288	1.45341	1.44995	1.44825	1.44597	1.44124	1.4495	1.45274	1.44786	1.44484	1.44721	1.44082	1.44247	1.45018	1.44524	1.45713	1.43857	1.42997	1.43751	1.4412	1.45068	1.44263	1.45909	1.45916	1.45295	1.45574	1.4548	1.45131	1.44711	1.42067	1.42452	1.42159	1.42539	1.41066	1.4105	1.41995	1.45037	1.44069	1.44044	1.43844	1.45372	1.44948
0.647598	0.703191	0.685666	0.71324	0.72066	0.745652	0.666844	0.80166	0.888811	0.666522	0.619021	0.733546	0.68071	0.675641	0.736366	0.66974	0.630009	0.702172	0.732991	0.707877	0.63233	0.679285	0.628268	0.700717	0.645753	0.601559	0.730358	0.715645	0.755613	1.1155	0.633939	0.653071	0.89157	0.677534	0.71516	1.06452	0.67185	0.692563	0.64165	0.691526	0.666305	0.727734	0.695207	0.685221	0.613617	0.648405	0.654238	0.625132	0.646396	0.606834
-0.702959	-1.31263	-1.6175	-0.776216	-1.2497	-1.69338	-0.720465	-1.20622	-1.49988	-0.723396	-1.04337	-1.46112	-0.750935	-1.29641	-1.62946	-0.691869	-1.24512	-1.67374	-0.895559	-1.27367	-1.7006	-0.740038	-1.1757	-1.54378	-0.756543	-1.04077	-1.49825	-1.52045	-1.26285	-1.35154	-0.703076	-1.00101	-1.44759	-0.669571	-1.09002	-1.41814	-1.11254	-1.62104	-1.79314	-1.79031	-0.981534	-1.76065	-1.80048	-1.84034	-1.12286	-1.81099	-1.84711	-1.86272	-1.31903	-1.79908
0.653004	0.666756	0.741066	0.721807	0.714327	0.679027	0.688739	0.661717	0.680215	0.675734	0.682627	0.64607	0.70917	0.717759	0.651254	0.701488	0.686015	0.689403	0.710791	0.697011	0.705759	0.713522	0.655964	0.677436	0.686096	0.640044	0.676475	0.689358	0.73913	0.758726	0.679322	0.652786	0.683737	0.673201	0.631916	0.678465	0.68009	0.729704	0.725309	0.699923	0.699864	0.771043	0.746843	0.729127	0.669941	0.695556	0.680518	0.693867	0.671081	0.661799
0.166163	0.15752	0.164948	0.182146	0.164878	0.16562	0.18399	0.153005	0.163421	0.166127	0.153015	0.168516	0.156576	0.155521	0.175505	0.163028	0.150164	0.156731	0.156224	0.168067	0.159331	0.162233	0.174508	0.162531	0.161424	0.154145	0.155774	0.166166	0.174615	0.170592	0.154664	0.156572	0.150028	0.150849	0.154477	0.161211	0.150459	0.155962	0.150074	0.159939	0.171874	0.165488	0.1637	0.154657	0.157461	0.15565	0.145251	0.161531	0.156862	0.160905
-0.395329	-0.392001	-0.402853	-0.411326	-0.403045	-0.396817	-0.404652	-0.408611	-0.392824	-0.403526	-0.405367	-0.397467	-0.419858	-0.398307	-0.413767	-0.369446	-0.42817	-0.392388	-0.417639	-0.407461	-0.392591	-0.424239	-0.385146	-0.408068	-0.404656	-0.380235	-0.401907	-0.452181	-0.415288	-0.455265	-0.389641	-0.396036	-0.394594	-0.386207	-0.385698	-0.391762	-0.399897	-0.457606	-0.384784	-0.377831	-0.421236	-0.451571	-0.39992	-0.394214	-0.407712	-0.386386	-0.397499	-0.400106	-0.366731	-0.374439
1.37344	1.46268	1.60801	1.67977	1.6419	1.62991	1.65207	1.63688	1.57543	1.45136	1.51068	1.42234	1.64901	1.52825	1.49521	1.64089	1.58321	1.53798	1.64268	1.54885	1.49041	1.49714	1.54808	1.45525	1.51681	1.45049	1.46657	1.6783	1.62964	1.57318	1.45852	1.47872	1.58403	1.53503	1.48742	1.54582	1.5655	1.58082	1.56332	1.55027	1.65054	1.62883	1.59836	1.54915	1.45479	1.43497	1.51323	1.48811	1.49297	1.48463
0.422118	0.446538	0.372482	0.411806	0.404919	0.388635	0.378023	0.444431	0.425362	0.407617	0.383022	0.396818	0.474204	0.435576	0.438585	0.452041	0.427317	0.406596	0.462917	0.435263	0.360745	0.528105	0.526215	0.471031	0.50392	0.427551	0.436875	0.50108	0.519023	0.462743	0.492593	0.460976	0.43879	0.471752	0.437885	0.391515	0.382141	0.420356	0.374803	0.364903	0.308133	0.421032	0.376972	0.344208	0.366712	0.432483	0.346152	0.305461	0.333897	0.348257
0.138743	0.139565	0.136077	0.136228	0.133012	0.142562	0.140411	0.141144	0.13517	0.135711	0.143317	0.139162	0.144158	0.136815	0.141126	0.138802	0.142991	0.145162	0.140922	0.138304	0.142249	0.140131	0.152899	0.137133	0.145183	0.149765	0.146196	0.131477	0.127581	0.14508	0.150559	0.149307	0.138849	0.146809	0.150254	0.146545	0.139101	0.132146	0.133842	0.143136	0.136596	0.141597	0.135172	0.143119	0.131847	0.135283	0.138356	0.134361	0.139934	0.132142
2.74422	2.69399	2.16101	3.02702	2.86463	2.08428	3.05678	3.07682	2.50026	3.21654	2.85393	2.23939	3.38383	2.88333	2.17336	3.409	2.7739	2.20202	3.22986	2.65679	2.03302	2.95104	2.51642	2.17785	3.32504	2.68746	2.3719	2.52524	3.0365	3.25967	3.4285	2.92449	2.40716	3.45861	2.7928	3.02747	2.32525	2.37511	2.03309	2.11772	2.57548	2.34573	2.1855	1.67469	2.63697	1.91331	1.51922	1.42174	2.55108	1.80744
-0.952233	-0.952233	-0.952233	-0.952233	-0.952233	-0.952233	-0.952233	-0.952233	-0.952233	-0.952233	-0.952233	-0.952233	-0.952233	-0.952233	-0.952233	-0.952233	-0.952233	-0.952233	-0.952233	-0.952233	-0.952233	-0.952233	-0.952233	-0.952233	-0.952233	-0.952233	-0.952233	-0.952233	-0.952233	-0.952233	-0.952233	-0.952233	-0.952233	-0.952233	-0.952233	-0.952233	-0.952233	-0.952233	-0.952233	-0.952233	-0.952233	-0.952233	-0.952233	-0.952233	-0.952233	-0.952233	-0.952233	-0.952233	-0.952233	-0.952233
1.51295	1.41556	1.54749	1.69286	1.488	1.3945	1.52779	1.70767	1.58766	1.48289	1.37653	1.63096	1.55942	1.35574	1.32052	1.46307	1.45576	1.54261	1.47597	1.42246	1.52168	1.35461	1.55408	1.59277	1.33688	1.3955	1.49704	1.34534	1.54145	1.35533	1.4288	1.45617	1.40372	1.46875	1.34469	1.50762	1.36312	1.49707	1.40589	1.34703	1.41657	1.49907	1.42226	1.48587	1.41479	1.38459	1.30523	1.38203	1.4423	1.40502
2.10889	2.1821	3.05086	2.26809	2.2426	2.46622	2.23193	2.05248	2.21297	2.25185	2.30736	2.22323	2.17862	2.19201	2.02338	1.95659	2.13416	2.11945	2.10882	2.16763	2.46554	2.6544	2.08766	2.16552	2.27087	2.40816	2.01739	2.16366	2.25468	2.20943	2.10337	2.12516	2.09724	2.28046	1.93715	2.05117	2.13483	2.60377	2.18776	2.28695	2.80849	2.7651	2.40691	2.20261	2.1707	2.14721	2.19445	2.13828	2.22742	2.17162
0.128542	0.127572	0.152826	0.138554	0.132787	0.146286	0.13012	0.12441	0.135506	0.11234	0.124237	0.118677	0.119183	0.132027	0.123045	0.127941	0.120336	0.118444	0.130534	0.137067	0.127354	0.1322	0.12491	0.128993	0.120054	0.127376	0.126746	0.131582	0.128875	0.136123	0.12656	0.124327	0.123791	0.12582	0.11989	0.124627	0.128373	0.140972	0.12653	0.128685	0.135055	0.131772	0.142849	0.128102	0.124483	0.130271	0.135354	0.123096	0.125776	0.12297
-1.5532	-1.38909	-1.3715	-1.34353	-1.33217	-1.36436	-1.62737	-1.5143	-1.48435	-1.48594	-1.41486	-1.4259	-1.74651	-1.41674	-1.41865	-1.49602	-1.33197	-1.48031	-1.55837	-1.37017	-1.49722	-1.55085	-1.43487	-1.53128	-1.34401	-1.40174	-1.59664	-1.56938	-1.36258	-1.33058	-1.42624	-1.45834	-1.44474	-1.45075	-1.39537	-1.4485	-1.59324	-1.40926	-1.61958	-1.65296	-1.4315	-1.44599	-1.57385	-1.69944	-1.56757	-1.367	-1.60862	-1.63555	-1.65476	-1.45345
0.21958	0.267072	0.205266	0.19175	0.220059	0.212158	0.224628	0.306846	0.295608	0.261457	0.311186	0.230627	0.201764	0.223588	0.293753	0.215092	0.245617	0.275748	0.192356	0.23092	0.271659	0.200315	0.264104	0.29447	0.252934	0.313182	0.268794	0.198457	0.243212	0.273681	0.242579	0.273118	0.289238	0.245618	0.302505	0.271271	0.225511	0.226521	0.26629	0.233342	0.196555	0.200079	0.279706	0.236265	0.256814	0.252375	0.275413	0.260934	0.223416	0.294555
-0.0224103	-0.0227604	-0.0248981	-0.022609	-0.0228363	-0.0268425	-0.0236308	-0.0320523	-0.0359097	-0.021699	-0.0211841	-0.0334125	-0.023301	-0.0216716	-0.0299008	-0.0233803	-0.0214977	-0.0339681	-0.0268197	-0.0242779	-0.0262459	-0.0213332	-0.022011	-0.0246838	-0.0223365	-0.0227913	-0.0436576	-0.0388621	-0.0468202	-0.0593418	-0.021065	-0.0221517	-0.0341704	-0.021889	-0.0283381	-0.045645	-0.0218787	-0.0274012	-0.0214689	-0.0221287	-0.0230154	-0.023442	-0.0325516	-0.0224235	-0.0229679	-0.0219211	-0.0220377	-0.0204852	-0.0211395	-0.0214364
-0.197735	-0.193065	-0.184352	-0.19216	-0.212844	-0.197074	-0.206548	-0.21172	-0.205052	-0.181882	-0.19111	-0.193717	-0.211109	-0.211603	-0.20771	-0.220372	-0.21123	-0.19988	-0.218431	-0.227551	-0.215395	-0.187553	-0.196398	-0.198384	-0.194875	-0.17788	-0.183355	-0.19328	-0.2183	-0.204665	-0.169284	-0.176258	-0.174964	-0.175019	-0.176731	-0.173364	-0.210485	-0.203596	-0.206205	-0.2052	-0.178427	-0.214243	-0.213542	-0.188489	-0.194467	-0.20779	-0.198105	-0.195634	-0.184847	-0.206177
-0.250553	-0.352327	-0.527455	-0.279569	-0.351734	-0.576607	-0.256157	-0.450282	-0.470201	-0.24116	-0.280457	-0.481335	-0.293345	-0.318764	-0.542536	-0.270341	-0.38397	-0.56558	-0.279169	-0.38779	-0.527833	-0.268499	-0.359193	-0.471346	-0.288111	-0.362907	-0.548088	-0.398466	-0.450817	-0.567539	-0.265633	-0.274384	-0.450136	-0.248333	-0.394647	-0.476334	-0.266351	-0.425544	-0.592483	-0.621279	-0.359373	-0.53521	-0.607565	-0.630443	-0.25863	-0.54963	-0.603645	-0.627501	-0.248612	-0.487455
0.555708	0.587902	0.565414	0.585552	0.565536	0.559368	0.496569	0.548593	0.567737	0.564863	0.581653	0.595383	0.564633	0.585645	0.611947	0.565079	0.577733	0.596883	0.573547	0.604552	0.571625	0.528574	0.52053	0.561952	0.545821	0.570872	0.573469	0.538965	0.610164	0.599698	0.568563	0.566895	0.60401	0.494059	0.570822	0.556699	0.589246	0.52519	0.567127	0.558209	0.528577	0.572085	0.53684	0.538489	0.556262	0.559887	0.574354	0.587615	0.551797	0.563537
-0.313437	-0.585278	-0.721217	-0.346101	-0.557219	-0.755051	-0.321243	-0.537831	-0.668773	-0.32255	-0.465222	-0.651487	-0.334829	-0.578046	-0.726549	-0.308492	-0.555176	-0.746293	-0.399314	-0.567909	-0.758266	-0.32997	-0.524226	-0.688344	-0.33733	-0.464063	-0.668046	-0.677943	-0.563084	-0.602628	-0.31349	-0.446332	-0.645456	-0.29855	-0.486022	-0.632323	-0.496061	-0.722793	-0.799531	-0.798266	-0.437649	-0.785045	-0.802803	-0.820576	-0.500663	-0.807487	-0.823593	-0.830556	-0.588131	-0.802177
-0.292784	-0.29895	-0.332268	-0.323633	-0.320279	-0.304452	-0.308806	-0.296691	-0.304984	-0.302975	-0.306066	-0.289675	-0.317967	-0.321818	-0.292	-0.314522	-0.307585	-0.309104	-0.318694	-0.312515	-0.316437	-0.319918	-0.294111	-0.303739	-0.307621	-0.286973	-0.303307	-0.309084	-0.3314	-0.340186	-0.304584	-0.292686	-0.306564	-0.30184	-0.283329	-0.3042	-0.304929	-0.327174	-0.325203	-0.313821	-0.313794	-0.345708	-0.334858	-0.326915	-0.300378	-0.311863	-0.30512	-0.311105	-0.300889	-0.296727
0.325318	0.318824	0.33077	0.322648	0.318437	0.331844	0.313327	0.320504	0.323624	0.342276	0.324726	0.318166	0.367289	0.340694	0.308272	0.33529	0.343798	0.330321	0.325624	0.333978	0.344746	0.328524	0.329153	0.317166	0.3469	0.324069	0.31694	0.334452	0.319811	0.315546	0.312762	0.322312	0.317134	0.329052	0.312774	0.313906	0.324227	0.359927	0.319066	0.339391	0.323702	0.334139	0.315106	0.327737	0.326705	0.3069	0.318384	0.303907	0.314542	0.315419
0.14255	0.125912	0.143318	0.139111	0.143158	0.139026	0.141319	0.129121	0.13213	0.14568	0.119028	0.126564	0.139248	0.129699	0.141985	0.153651	0.140184	0.129937	0.150124	0.144426	0.140646	0.1558	0.133695	0.14354	0.142796	0.132893	0.125732	0.137467	0.13492	0.135925	0.143175	0.127513	0.131623	0.1386	0.13615	0.124385	0.150412	0.145784	0.127943	0.139487	0.154195	0.143222	0.151341	0.135006	0.164147	0.133402	0.127287	0.13142	0.155598	0.126868
0.0726932	0.0728474	0.077146	0.0740516	0.0783526	0.0783121	0.0776972	0.0711796	0.0709444	0.0737716	0.0784314	0.0747389	0.0780476	0.0769146	0.0780227	0.0733325	0.0714567	0.0658624	0.0688595	0.0752458	0.0747685	0.0773149	0.0733622	0.073754	0.0744989	0.0741654	0.0767227	0.0766644	0.0707101	0.0705972	0.0721891	0.0760358	0.0701838	0.0729194	0.0684741	0.0714533	0.074326	0.0900334	0.071535	0.0801239	0.0873128	0.077091	0.071652	0.0747653	0.0702848	0.0714245	0.0719394	0.0749881	0.0699586	0.0727543
1.48388	1.30409	1.95917	1.95278	1.43961	1.1511	1.44738	1.2657	1.20467	1.72668	1.59202	1.29058	1.32891	1.21544	0.731353	1.30468	1.32538	0.891893	1.27281	1.27383	1.22438	1.80137	1.30446	1.10816	1.64424	1.67764	0.707517	0.787346	1.37858	1.03916	1.54546	1.44915	1.02868	1.70667	1.07579	0.988531	1.14486	1.52128	0.555443	0.547339	1.95447	1.42068	0.809261	0.488327	1.28728	0.768135	0.48906	0.429205	1.16019	0.853085
[truncated: 65 more columns]

## Sheet: GSE46903
GSM1140407	GSM1140408	GSM1140409	GSM1140757	GSM1140758	GSM1140759	GSM1140760	GSM1140761	GSM1140762	GSM1140766	GSM1140770	GSM1140771	GSM1140774	GSM1140775	GSM1140776	GSM1140777	GSM1140778	GSM1140779	GSM1140410	GSM1140411	GSM1140412	GSM1140413	GSM1140414	GSM1140415	GSM1140416	GSM1140417	GSM1140418	GSM1140419	GSM1140420	GSM1140421	GSM1140422	GSM1140423	GSM1140424	GSM1140425	GSM1140426	GSM1140427	GSM1140428	GSM1140429	GSM1140430	GSM1140431	GSM1140432	GSM1140433	GSM1140434	GSM1140435	GSM1140436	GSM1140437	GSM1140438	GSM1140439	GSM1140440	GSM1140441
1.04445	1.04445	1.04445	1.04445	1.04445	1.04445	1.04445	1.04445	1.04445	1.04445	1.04445	1.04445	1.04445	1.04445	1.04445	1.04445	1.04445	1.04445	1.04445	1.04445	1.04445	1.04445	1.04445	1.04445	1.04445	1.04445	1.04445	1.04445	1.04445	1.04445	1.04445	1.04445	1.04445	1.04445	1.04445	1.04445	1.04445	1.04445	1.04445	1.04445	1.04445	1.04445	1.04445	1.04445	1.04445	1.04445	1.04445	1.04445	1.04445	1.04445
-2.03379	-2.0642	-2.21803	-1.86345	-1.85177	-1.86111	-1.86042	-1.84309	-1.90973	-1.96846	-1.83243	-1.83559	-1.85597	-1.85277	-1.85203	-1.91373	-1.82674	-1.88431	-3.74225	-2.92688	-3.86272	-3.97968	-2.08455	-3.81582	-3.65354	-2.14175	-3.56841	-1.87237	-2.27503	-2.48352	-2.13597	-3.27869	-2.06656	-1.89626	-3.5295	-1.92873	-2.43489	-2.04743	-3.78887	-2.06425	-2.1449	-3.83182	-1.89841	-1.86761	-2.45898	-3.50577	-3.65723	-2.18424	-2.24956	-1.90923
0.0116049	0.011439	0.0114791	0.0116861	0.0121612	0.0117785	0.0117067	0.0115068	0.0114562	0.0116935	0.0116585	0.0114299	0.0114064	0.0111952	0.0112858	0.0111624	0.0112919	0.0112651	0.0117552	0.0129506	0.0128444	0.0133671	0.01268	0.013854	0.0117221	0.012557	0.0116181	0.0126409	0.0133013	0.0118995	0.0115213	0.0131543	0.0136729	0.011679	0.0115266	0.0116402	0.0117094	0.013887	0.0118129	0.0119838	0.0150859	0.0114979	0.0128032	0.0147962	0.0129067	0.012535	0.0125561	0.0151917	0.0120383	0.0129391
0.610863	0.656385	0.654315	0.637032	0.74986	0.672523	0.60294	0.592787	0.60775	0.623595	0.592684	0.604484	0.567987	0.581823	0.59652	0.590422	0.588169	0.591244	0.60232	0.924395	0.606032	0.626374	0.973767	0.612199	0.60004	0.960996	0.598026	0.878849	0.920266	0.938186	0.882212	0.653938	0.768203	0.946459	0.629467	0.964048	1.02456	0.843065	0.61834	0.967922	1.03795	0.664469	0.939638	0.940784	0.932238	0.689183	0.678546	0.742588	0.941726	0.930587
0.986435	1.02255	1.04955	0.989821	1.087	1.03171	0.923897	0.93849	1.01304	1.0857	0.913369	0.910354	0.944957	0.941192	0.939014	0.939635	0.930094	0.94299	0.962913	1.4537	1.04059	1.04591	1.4238	1.07719	0.983135	1.45342	0.929484	1.28914	1.39725	1.43	1.27955	1.04506	1.23546	1.39134	0.928337	1.45751	1.40529	1.24763	0.91963	1.33793	1.41902	1.03341	1.41327	1.38493	1.44835	0.988457	1.0973	1.18275	1.47748	1.2786
1.25052	1.113	1.17503	1.11809	1.26841	1.11959	1.07116	1.07537	1.09327	1.10488	1.08909	1.08622	1.08778	1.07788	1.08466	1.0654	1.08931	1.07785	1.14403	1.329	1.19613	1.20572	1.25726	1.22412	1.15398	1.28424	1.09228	1.13656	1.23624	1.16802	1.15182	1.12199	1.20843	1.07498	1.08769	1.17565	1.14059	1.07981	1.0696	1.17388	1.2227	1.1939	1.12143	1.22499	1.10865	1.16557	1.21075	1.15749	1.09742	1.13491
1.70991	1.72382	1.689	1.71026	1.72078	1.70175	1.72389	1.7029	1.73753	1.67375	1.72383	1.71582	1.72483	1.70901	1.70397	1.68592	1.72347	1.71748	1.70241	1.72311	1.69309	1.6781	1.704	1.71902	1.71338	1.67458	1.7308	1.69302	1.7133	1.74542	1.74746	1.78153	1.70595	1.69519	1.77874	1.69979	1.703	1.6958	1.72343	1.70781	1.73264	1.70011	1.70463	1.69216	1.73993	1.73757	1.70529	1.70778	1.66859	1.74538
-0.823681	-0.840812	-0.837819	-0.834237	-0.855202	-0.832012	-0.838103	-0.84819	-0.835606	-0.841895	-0.835777	-0.844136	-0.850585	-0.837875	-0.836171	-0.867543	-0.843427	-0.836103	-0.850869	-0.855223	-0.8414	-0.865988	-0.851643	-0.847656	-0.830838	-0.844078	-0.837037	-0.833445	-0.844287	-0.842451	-0.816086	-0.828944	-0.842378	-0.830294	-0.847547	-0.847713	-0.817818	-0.842781	-0.831219	-0.830172	-0.864842	-0.821536	-0.810639	-0.822387	-0.828354	-0.827929	-0.826597	-0.808955	-0.83604	-0.837606
0.00778612	0.00803295	0.007831	0.00786535	0.00820909	0.00765383	0.00774742	0.00785016	0.00782591	0.00884769	0.0079498	0.00784587	0.00782363	0.0077107	0.00769296	0.00786394	0.00778904	0.00786289	0.00778072	0.00802884	0.00780535	0.00770369	0.00813263	0.00781338	0.00782846	0.00811277	0.00783428	0.0076574	0.00793947	0.0108128	0.00833748	0.010064	0.00778855	0.0078361	0.00943438	0.0076036	0.00792122	0.00777961	0.0123264	0.00805937	0.00826996	0.0156077	0.00784568	0.008122	0.00784472	0.00922567	0.0103123	0.0078058	0.00872804	0.00789195
0.0626557	0.0654248	0.0628802	0.0630233	0.0624418	0.0639472	0.0644687	0.0634089	0.0629901	0.0638289	0.0639546	0.0647943	0.0646424	0.0634137	0.0644228	0.0649196	0.0633449	0.0644655	0.0666985	0.0626224	0.0631043	0.0638552	0.0711173	0.0764502	0.0704798	0.0647562	0.0636916	0.0646984	0.0940758	0.0738356	0.0745501	0.123603	0.0639385	0.0639409	0.133203	0.0692822	0.0705418	0.0702917	0.130225	0.0707541	0.0825497	0.124951	0.0631864	0.0681237	0.064161	0.129398	0.134149	0.0824843	0.0667647	0.063135
1.08977	1.0854	1.09688	1.0939	1.08067	1.07121	1.09004	1.09859	1.09598	1.09915	1.08631	1.07884	1.09058	1.10171	1.09405	1.09818	1.09249	1.09014	1.08186	1.13682	1.0876	1.09674	1.11137	1.09727	1.08581	1.12442	1.12135	1.22292	1.11609	1.12082	1.16446	1.08356	1.13507	1.13419	1.1508	1.07615	1.10286	1.20969	1.0944	1.07416	1.18383	1.06923	1.10444	1.20843	1.12896	1.08496	1.08604	1.218	1.08631	1.10866
0.125378	0.126232	0.128506	0.126459	0.125455	0.127869	0.125629	0.126119	0.124611	0.12465	0.126026	0.125864	0.127585	0.126057	0.125545	0.125781	0.12421	0.125347	0.136244	0.226486	0.159945	0.137792	0.229898	0.164867	0.129426	0.233902	0.12682	0.183485	0.240032	0.21992	0.232108	0.180728	0.184408	0.215605	0.174143	0.222862	0.232871	0.199439	0.170723	0.235139	0.232051	0.174527	0.213531	0.196681	0.215503	0.202585	0.204359	0.210518	0.213442	0.226121
-1.09648	-1.04303	-1.04161	-1.08187	-1.04603	-1.07121	-1.07331	-1.07381	-1.06761	-1.07182	-1.09985	-1.0916	-1.07922	-1.0777	-1.04813	-1.0659	-1.08185	-1.08002	-1.05809	-1.88469	-1.1032	-1.11757	-1.8315	-1.09391	-1.05464	-1.91292	-1.08158	-1.14162	-1.70139	-1.68032	-1.59523	-1.19234	-1.20507	-1.40116	-1.3078	-1.57687	-1.71287	-1.29795	-1.08596	-1.51757	-1.6689	-1.35553	-1.56104	-1.38046	-1.76784	-1.26694	-1.45782	-1.2778	-1.68346	-1.29868
-1.13938	-1.07122	-1.11497	-0.883586	-0.961778	-0.910448	-1.12765	-1.02814	-1.09329	-1.13431	-1.08303	-1.19312	-1.11937	-1.25025	-1.18278	-1.00957	-1.12312	-1.23872	-1.55904	-1.37808	-1.52546	-1.55711	-1.39541	-1.58016	-1.48282	-1.35145	-1.49025	-1.27542	-1.43021	-1.48858	-1.36979	-1.51993	-1.24619	-1.24011	-1.58816	-1.28443	-1.3928	-1.21206	-1.55594	-1.33167	-1.334	-1.70838	-1.29686	-1.22629	-1.40097	-1.5388	-1.70674	-1.27108	-1.44268	-1.2612
-0.0179515	-0.017574	-0.0174959	-0.0175202	-0.0186546	-0.0176307	-0.0177731	-0.017361	-0.0176476	-0.0176447	-0.0177611	-0.0169489	-0.0179883	-0.0177952	-0.0175009	-0.017702	-0.0179177	-0.0177274	-0.0180643	-0.0177813	-0.0176437	-0.0177586	-0.0173151	-0.0177161	-0.0181282	-0.0175098	-0.0204228	-0.0171217	-0.0174246	-0.01737	-0.0171789	-0.0185814	-0.017945	-0.0170594	-0.0173908	-0.0176921	-0.0174227	-0.0185129	-0.0174522	-0.017503	-0.0174843	-0.0187682	-0.0172057	-0.0177932	-0.0176085	-0.0174941	-0.0207051	-0.0172932	-0.0171714	-0.0179986
0.305761	0.307116	0.294803	0.372192	0.357396	0.372076	0.33929	0.334787	0.338676	0.34839	0.333855	0.325435	0.349865	0.33903	0.334092	0.328974	0.328299	0.338673	0.257664	0.275173	0.256155	0.250601	0.276243	0.256614	0.285557	0.274721	0.266404	0.286266	0.24595	0.2647	0.254989	0.254764	0.286863	0.28997	0.263449	0.296881	0.281559	0.261988	0.236262	0.296316	0.269814	0.231035	0.289638	0.28236	0.26107	0.240165	0.246805	0.239735	0.260416	0.27714
1.20574	1.16019	1.16509	1.17263	1.19147	1.15798	1.16817	1.16243	1.13767	1.14968	1.16112	1.14029	1.15012	1.16817	1.19179	1.15954	1.17342	1.14683	1.12323	1.07616	1.12572	1.13488	1.07231	1.10692	1.10577	1.07342	1.0651	1.17195	1.07366	1.10332	1.12471	1.11646	1.17904	1.16309	1.12128	1.13931	1.12871	1.13456	1.10955	1.10149	1.11276	1.07372	1.13031	1.12277	1.0755	1.08057	1.0942	1.10585	1.0826	1.17135
-0.210283	-0.210783	-0.205177	-0.212792	-0.215108	-0.21163	-0.211582	-0.209468	-0.209414	-0.209049	-0.213276	-0.208601	-0.210751	-0.213494	-0.210178	-0.208317	-0.212123	-0.211102	-0.282241	-0.214847	-0.217303	-0.211982	-0.211708	-0.225147	-0.288789	-0.213358	-0.314964	-0.210762	-0.272086	-0.217405	-0.269308	-0.269555	-0.208258	-0.215244	-0.295301	-0.210428	-0.219163	-0.219541	-0.315905	-0.233639	-0.236031	-0.29283	-0.217436	-0.212645	-0.215815	-0.327916	-0.313748	-0.244733	-0.219638	-0.248311
0.531973	0.532012	0.518773	0.544947	0.529905	0.551696	0.524944	0.516751	0.518558	0.519711	0.525691	0.516377	0.515776	0.518417	0.520631	0.519531	0.514331	0.518251	0.527079	0.542335	0.529657	0.538053	0.526149	0.531182	0.524921	0.535663	0.527674	0.539314	0.531972	0.535061	0.523841	0.526321	0.567555	0.524848	0.555368	0.526836	0.525632	0.537226	0.53303	0.520694	0.542569	0.521039	0.525814	0.529995	0.545632	0.529126	0.570645	0.580921	0.551885	0.525957
0.912388	0.978938	0.962814	1.05074	1.1399	1.01322	0.91038	0.938701	0.904934	0.909802	0.896572	0.933506	0.93687	0.930642	0.906091	0.948399	0.902104	0.920065	0.917398	1.12671	0.998977	0.942033	1.13839	1.11233	0.912191	1.16459	0.898598	1.29501	1.32194	1.27176	1.32239	1.08111	1.38137	1.37233	0.981804	1.3478	1.32283	1.3837	0.935785	1.27221	1.27916	0.975503	1.28985	1.32362	1.26439	1.01396	1.06345	1.46032	1.25378	1.32148
-0.0582934	-0.0591432	-0.0586164	-0.0590186	-0.0605389	-0.0588884	-0.0599684	-0.0583482	-0.057957	-0.0594249	-0.0570798	-0.0591529	-0.0576269	-0.0589195	-0.0587611	-0.0590613	-0.0599793	-0.0584499	-0.0688001	-0.0584357	-0.0691706	-0.0651326	-0.0607881	-0.0649975	-0.0684694	-0.0583656	-0.0678709	-0.0611972	-0.0602172	-0.0598706	-0.0589283	-0.0582487	-0.0605527	-0.0602738	-0.0602959	-0.057386	-0.0586193	-0.0583493	-0.0615258	-0.0608312	-0.0584528	-0.0685752	-0.0565378	-0.0591663	-0.0583086	-0.0630139	-0.0606266	-0.05804	-0.0590169	-0.0588208
1.32951	1.29119	1.29001	1.16772	1.12558	1.14425	1.1368	1.17192	1.21977	1.20332	1.14673	1.16513	1.15355	1.19036	1.12243	1.17192	1.13296	1.1425	0.661887	0.70328	0.691681	0.675292	0.664531	0.677254	0.658427	0.680405	0.666046	0.68365	0.679883	0.693837	0.730645	0.67998	0.700237	0.681986	0.691322	0.685854	0.675933	0.680838	0.706857	0.686646	0.678601	0.812207	0.691043	0.68394	0.702072	0.694621	0.751076	0.70794	0.680458	0.673389
0.401911	0.400336	0.405317	0.400572	0.409299	0.394401	0.400426	0.391589	0.39354	0.397727	0.402534	0.401387	0.402032	0.404078	0.398983	0.397559	0.399845	0.405849	0.392357	0.39648	0.403869	0.401588	0.401073	0.401358	0.400648	0.400051	0.397313	0.396459	0.39474	0.40189	0.395362	0.426658	0.394505	0.401788	0.407478	0.401735	0.413432	0.415544	0.396917	0.405327	0.408597	0.40352	0.40055	0.399075	0.392854	0.395713	0.40899	0.39606	0.394273	0.402865
-0.384078	-0.373821	-0.382235	-0.381509	-0.357956	-0.383363	-0.419525	-0.423499	-0.419756	-0.410385	-0.409249	-0.424745	-0.419003	-0.41422	-0.406726	-0.40725	-0.407588	-0.405054	-0.339816	-0.362239	-0.343582	-0.331327	-0.366975	-0.34356	-0.324122	-0.37394	-0.346071	-0.325219	-0.337215	-0.340923	-0.338818	-0.353298	-0.344769	-0.338515	-0.360692	-0.337031	-0.342404	-0.34091	-0.347868	-0.330606	-0.343148	-0.337534	-0.358482	-0.334641	-0.35236	-0.343365	-0.345744	-0.338641	-0.352302	-0.332779
1.40724	1.40884	1.4114	1.41502	1.41397	1.41482	1.46841	1.46607	1.47062	1.43741	1.53409	1.4348	1.47263	1.45854	1.42994	1.46616	1.46175	1.43604	1.3739	1.35697	1.39891	1.34178	1.37007	1.37324	1.34425	1.35128	1.36732	1.3209	1.3208	1.34773	1.32213	1.32296	1.3134	1.29534	1.34083	1.38126	1.3335	1.34514	1.34181	1.33412	1.32237	1.38822	1.36505	1.33755	1.35036	1.31905	1.33848	1.30832	1.34088	1.35296
7.22995	7.25476	7.09216	7.59241	7.95992	7.55463	7.00603	7.14181	7.17165	7.09359	7.11147	6.89313	7.04237	6.95065	6.9633	7.07673	7.01459	6.84981	4.09479	5.70049	4.33607	4.05769	6.46534	4.50716	4.31065	6.42819	4.1882	7.48981	6.41403	6.25122	6.66922	4.94675	7.19861	7.31611	4.30262	7.24839	6.4294	7.13331	4.0504	6.86264	6.92466	4.00242	7.10086	7.54178	6.19462	4.44591	4.26818	6.96743	6.32137	7.31318
0.852937	0.852937	0.852937	0.852937	0.852937	0.852937	0.852937	0.852937	0.852937	0.852937	0.852937	0.852937	0.852937	0.852937	0.852937	0.852937	0.852937	0.852937	0.852937	0.852937	0.852937	0.852937	0.852937	0.852937	0.852937	0.852937	0.852937	0.852937	0.852937	0.852937	0.852937	0.852937	0.852937	0.852937	0.852937	0.852937	0.852937	0.852937	0.852937	0.852937	0.852937	0.852937	0.852937	0.852937	0.852937	0.852937	0.852937	0.852937	0.852937	0.852937
-0.767588	-0.776273	-0.770276	-0.772646	-0.813753	-0.772646	-0.629864	-0.589489	-0.398719	-0.420274	-0.576575	-0.501211	-0.596895	-0.514282	-0.631288	-0.558687	-0.555804	-0.508367	-0.447406	-0.681404	-0.622273	-0.512636	-0.718996	-0.619414	-0.435856	-0.681983	-0.396878	-0.651478	-0.567234	-0.629776	-0.646519	-0.420005	-0.693562	-0.590623	-0.434864	-0.619198	-0.704724	-0.512511	-0.39603	-0.740243	-0.615998	-0.463478	-0.604985	-0.701034	-0.731141	-0.400649	-0.492965	-0.505913	-0.585514	-0.520047
0.494122	0.494291	0.491025	0.484238	0.499975	0.490806	0.491219	0.498542	0.492384	0.494069	0.494811	0.496158	0.502369	0.491872	0.501343	0.503419	0.502642	0.487737	0.505596	0.486925	0.489631	0.476754	0.517755	0.4913	0.506436	0.503689	0.481415	0.497844	0.504943	0.480488	0.488837	0.486836	0.488903	0.501284	0.51053	0.477426	0.486505	0.498824	0.497413	0.490093	0.48391	0.544541	0.478558	0.474318	0.490429	0.543344	0.527578	0.519835	0.479193	0.483717
-2.97429	-2.89662	-2.80613	-2.77055	-2.73227	-2.80989	-3.00114	-2.85379	-2.73242	-2.73157	-2.90882	-3.15406	-3.01358	-3.16914	-2.93293	-2.94883	-2.8953	-2.98009	-2.55089	-2.39281	-2.3841	-2.45492	-2.45284	-2.34546	-2.69527	-2.39805	-2.60603	-2.29974	-2.25823	-2.31252	-2.20337	-2.18241	-2.25409	-2.24895	-2.40718	-2.35938	-2.31421	-2.28212	-2.42896	-2.45229	-2.39254	-2.38489	-2.4665	-2.37219	-2.46568	-2.34521	-2.44117	-2.28729	-2.33779	-2.43987
2.70002	2.72426	2.71089	2.70176	2.71081	2.69658	2.62318	2.59362	2.59643	2.60523	2.57103	2.56968	2.61742	2.65715	2.65949	2.66495	2.60481	2.64859	2.69957	2.67848	2.67766	2.65019	2.7029	2.71593	2.67498	2.7665	2.70016	2.67782	2.60647	2.59402	2.58427	2.66242	2.68542	2.68683	2.64284	2.71746	2.6578	2.62338	2.62294	2.64455	2.60444	2.69906	2.64326	2.69319	2.67682	2.66127	2.61426	2.66043	2.68367	2.62567
-0.224894	-0.223023	-0.227606	-0.237428	-0.251238	-0.254351	-0.241406	-0.213317	-0.211408	-0.209589	-0.227949	-0.229149	-0.235877	-0.240179	-0.254493	-0.221535	-0.240544	-0.253266	-0.2462	-0.278927	-0.25462	-0.251278	-0.278703	-0.26877	-0.263661	-0.28154	-0.260928	-0.294138	-0.301879	-0.269422	-0.302886	-0.29312	-0.302209	-0.299885	-0.262798	-0.291853	-0.287549	-0.315473	-0.268293	-0.30531	-0.31991	-0.256819	-0.281974	-0.28936	-0.291566	-0.284996	-0.284454	-0.303192	-0.27588	-0.339643
-0.478438	-0.478438	-0.479994	-0.462319	-0.470106	-0.464648	-0.464648	-0.463336	-0.454661	-0.451584	-0.458645	-0.462319	-0.457904	-0.458873	-0.459356	-0.459356	-0.464648	-0.462824	-0.461048	-0.460045	-0.463867	-0.465735	-0.456253	-0.460303	-0.459806	-0.462319	-0.46439	-0.464932	-0.448691	-0.461777	-0.448691	-0.436684	-0.455129	-0.464125	-0.441692	-0.46547	-0.46917	-0.453316	-0.43947	-0.463336	-0.459806	-0.42498	-0.469472	-0.455354	-0.466284	-0.428547	-0.416857	-0.447699	-0.460045	-0.452859
-0.759657	-0.758407	-0.771777	-0.695038	-0.709495	-0.703509	-0.830732	-0.822549	-0.84546	-0.847508	-0.829957	-0.835445	-0.84092	-0.824705	-0.758026	-0.833111	-0.835718	-0.797713	-0.685051	-0.640601	-0.713377	-0.729152	-0.641398	-0.640556	-0.707489	-0.653391	-0.7144	-0.588232	-0.537771	-0.561549	-0.540146	-0.521886	-0.571457	-0.551225	-0.554109	-0.550138	-0.552624	-0.567207	-0.573442	-0.632685	-0.643159	-0.590543	-0.618525	-0.635468	-0.619359	-0.615642	-0.574603	-0.634496	-0.613612	-0.632856
-0.278637	-0.301246	-0.283389	-0.280446	-0.329409	-0.280784	-0.243239	-0.229853	-0.202393	-0.226426	-0.232616	-0.213391	-0.237704	-0.216574	-0.249737	-0.244724	-0.300534	-0.273828	-0.200061	-0.253039	-0.278605	-0.22329	-0.262884	-0.310297	-0.211854	-0.269334	-0.195142	-0.353054	-0.284422	-0.254879	-0.318509	-0.277643	-0.36508	-0.300328	-0.230147	-0.278637	-0.322311	-0.336371	-0.219331	-0.322415	-0.311968	-0.26468	-0.306281	-0.346691	-0.320591	-0.252455	-0.270369	-0.300328	-0.277141	-0.306973
2.83981	2.82328	2.71218	2.91466	3.13664	2.81926	2.4945	2.47712	2.489	2.57641	2.51524	2.46683	2.61251	2.53899	2.70961	2.60019	2.55231	2.59182	2.67766	2.67187	3.51479	3.22486	2.67105	3.47524	2.72417	2.72324	2.44017	3.44156	2.68264	2.95764	3.11934	2.85033	3.73534	2.84648	2.77218	2.75328	2.89263	3.54875	2.96985	2.80595	2.77787	3.71081	2.85482	2.82036	2.97507	2.95953	3.12281	3.10621	2.84595	2.94415
1.0942	1.08604	1.10264	1.10015	1.15282	1.09094	1.1026	1.09655	1.1001	1.09974	1.09576	1.09255	1.09413	1.09384	1.10662	1.09205	1.08627	1.09681	1.36075	1.14507	1.33112	1.31868	1.14818	1.29019	1.30137	1.12301	1.33374	1.10059	1.2126	1.17676	1.12564	1.40325	1.11411	1.15054	1.43403	1.1162	1.14216	1.15967	1.49095	1.11953	1.16272	1.66041	1.11979	1.11253	1.14619	1.45751	1.57067	1.19626	1.1605	1.14901
2.49759	2.5468	2.53049	2.83532	3.04691	2.66469	2.1534	2.34644	2.68579	2.74143	2.29521	2.08258	2.29649	2.21104	2.54417	2.4473	2.30642	2.4018	3.50586	3.12846	4.1493	3.8864	3.08175	4.1808	3.28596	3.22276	3.17066	3.91918	3.46135	3.57191	3.7109	4.12401	4.23518	3.58293	3.88172	3.35262	3.38145	4.21657	4.10857	2.99677	3.13849	5.08237	3.20163	3.15324	3.24682	4.14709	4.20782	3.85675	3.47227	3.36325
3.45589	3.45589	3.45589	3.45589	3.45589	3.45589	3.45589	3.45589	3.45589	3.45589	3.45589	3.45589	3.45589	3.45589	3.45589	3.45589	3.45589	3.45589	3.45589	3.45589	3.45589	3.45589	3.45589	3.45589	3.45589	3.45589	3.45589	3.45589	3.45589	3.45589	3.45589	3.45589	3.45589	3.45589	3.45589	3.45589	3.45589	3.45589	3.45589	3.45589	3.45589	3.45589	3.45589	3.45589	3.45589	3.45589	3.45589	3.45589	3.45589	3.45589
0.10349	0.105037	0.112865	0.0948218	0.0942274	0.0947029	0.0946674	0.0937857	0.0971765	0.100165	0.0932434	0.0934041	0.0944412	0.0942784	0.0942404	0.0973801	0.0929537	0.0958834	0.190425	0.148934	0.196555	0.202506	0.106072	0.194168	0.185911	0.108983	0.181579	0.0952756	0.115765	0.126374	0.108689	0.166836	0.105157	0.0964912	0.179599	0.0981436	0.1239	0.104183	0.192797	0.10504	0.109143	0.194982	0.0966009	0.0950335	0.125125	0.178391	0.186099	0.111145	0.114469	0.0971515
-0.0663941	-0.0668402	-0.0674693	-0.0567645	-0.063393	-0.0643621	-0.0668644	-0.066471	-0.0672302	-0.0660153	-0.0664946	-0.0682628	-0.0686988	-0.0694048	-0.0689929	-0.0668402	-0.0662235	-0.0674149	-0.0377356	-0.0435798	-0.040836	-0.0430672	-0.0405762	-0.0447082	-0.0378147	-0.0400412	-0.0364377	-0.0634424	-0.0363303	-0.0408106	-0.0407778	-0.045946	-0.0657897	-0.0575328	-0.0405806	-0.0450634	-0.036626	-0.0543384	-0.0382317	-0.0410751	-0.0422999	-0.0367642	-0.0517097	-0.044119	-0.040297	-0.0389457	-0.0389566	-0.0453224	-0.0474105	-0.0479937
-0.3712	-0.380375	-0.389961	-0.396256	-0.400388	-0.394902	-0.364749	-0.349357	-0.313671	-0.329964	-0.361842	-0.387577	-0.37522	-0.391019	-0.377485	-0.35925	-0.367079	-0.385312	-0.368343	-0.40067	-0.387201	-0.379493	-0.412951	-0.396426	-0.380508	-0.41307	-0.357569	-0.406041	-0.404419	-0.406041	-0.402447	-0.384037	-0.401234	-0.401786	-0.36722	-0.411011	-0.393327	-0.393652	-0.371977	-0.397705	-0.390867	-0.384839	-0.390329	-0.390795	-0.378879	-0.360715	-0.385587	-0.411683	-0.39254	-0.418968
-0.256434	-0.256522	-0.254827	-0.251305	-0.259472	-0.254713	-0.254928	-0.258728	-0.255533	-0.256407	-0.256792	-0.257491	-0.260714	-0.255267	-0.260182	-0.261259	-0.260856	-0.253121	-0.262389	-0.252699	-0.254104	-0.247421	-0.268699	-0.25497	-0.262825	-0.261399	-0.24984	-0.258366	-0.26205	-0.249359	-0.253692	-0.252653	-0.253726	-0.260151	-0.26495	-0.24777	-0.252481	-0.258875	-0.258142	-0.254343	-0.251135	-0.2826	-0.248357	-0.246157	-0.254518	-0.281979	-0.273797	-0.269779	-0.248687	-0.251034
1.30131	1.20102	1.25081	1.24323	1.51649	1.20002	1.83607	1.80661	1.74505	1.76662	1.80038	1.69006	1.8257	1.58948	1.81447	1.78354	1.74768	1.70483	1.70034	1.24367	1.5435	1.51196	1.22119	1.52346	1.6792	1.17918	1.74677	1.16062	1.83244	1.2752	1.70045	1.80129	1.33402	1.11907	1.91879	1.10323	1.24433	1.60442	1.81047	1.32019	1.35009	1.89235	1.18395	1.12964	1.34297	1.89548	1.86899	1.72944	1.37359	1.63401
-1.16157	-1.19839	-1.16826	-1.17339	-1.22467	-1.14183	-1.15579	-1.17112	-1.1675	-1.31994	-1.18598	-1.17048	-1.16716	-1.15031	-1.14767	-1.17318	-1.162	-1.17302	-1.16076	-1.19778	-1.16443	-1.14927	-1.21326	-1.16563	-1.16788	-1.2103	-1.16875	-1.14236	-1.18444	-1.6131	-1.24382	-1.50139	-1.16193	-1.16902	-1.40746	-1.13434	-1.18172	-1.1606	-1.8389	-1.20233	-1.23375	-2.32842	-1.17045	-1.21167	-1.17031	-1.37632	-1.53844	-1.1645	-1.30209	-1.17735
-0.306266	-0.306511	-0.313429	-0.321481	-0.291512	-0.326741	-0.287254	-0.285624	-0.300344	-0.299243	-0.287146	-0.291856	-0.287486	-0.297369	-0.286845	-0.275076	-0.28603	-0.288758	-0.186532	-0.220086	-0.196403	-0.19527	-0.230883	-0.211918	-0.209425	-0.231561	-0.190657	-0.254671	-0.21855	-0.211026	-0.242175	-0.208801	-0.255151	-0.239803	-0.196673	-0.244747	-0.241957	-0.248848	-0.208668	-0.266139	-0.237351	-0.202495	-0.225478	-0.210906	-0.228603	-0.227526	-0.20423	-0.23441	-0.210211	-0.300901
-0.0825701	-0.0815422	-0.0824987	-0.0817046	-0.079896	-0.0818593	-0.0796752	-0.0809745	-0.0822928	-0.0895994	-0.0815963	-0.0807775	-0.0830202	-0.0817056	-0.0802423	-0.0810919	-0.0800266	-0.0822055	-0.082449	-0.0829365	-0.079508	-0.0828334	-0.0803995	-0.0814405	-0.0793837	-0.082286	-0.0816673	-0.0807072	-0.0817695	-0.0825767	-0.0868413	-0.100201	-0.0806399	-0.0805338	-0.0829846	-0.0810384	-0.0787513	-0.0822351	-0.100732	-0.0869217	-0.0850488	-0.133905	-0.0806908	-0.0800706	-0.0846555	-0.0890792	-0.103682	-0.0832818	-0.0794854	-0.0807215
0.514754	0.537504	0.516598	0.517775	0.512997	0.525365	0.529649	0.520942	0.517502	0.524393	0.525425	0.532325	0.531076	0.520981	0.529272	0.533354	0.520416	0.529623	0.547969	0.514481	0.51844	0.524609	0.584272	0.628085	0.579034	0.532012	0.523265	0.531536	0.772889	0.606604	0.612474	1.01547	0.525293	0.525313	1.09435	0.569195	0.579543	0.577489	1.06987	0.581287	0.678196	1.02654	0.519114	0.559677	0.527122	1.06308	1.10212	0.677658	0.548512	0.518692
0.191824	0.192412	0.188505	0.19091	0.194053	0.189438	0.185014	0.191751	0.190969	0.189798	0.190194	0.190227	0.189756	0.189174	0.188599	0.188047	0.191374	0.190854	0.198469	0.283103	0.198374	0.194045	0.302943	0.201443	0.191802	0.309428	0.190649	0.209699	0.285379	0.302565	0.296784	0.189122	0.2285	0.269071	0.19465	0.292259	0.301674	0.246894	0.192098	0.279851	0.30204	0.194084	0.28394	0.23994	0.295807	0.211339	0.214052	0.248768	0.288564	0.255936
-1.00737	-1.01183	-0.971268	-1.22623	-1.17749	-1.22585	-1.11783	-1.103	-1.11581	-1.14781	-1.09993	-1.07219	-1.15267	-1.11698	-1.10071	-1.08385	-1.08162	-1.1158	-0.848908	-0.906593	-0.843935	-0.825636	-0.910118	-0.845446	-0.940805	-0.905105	-0.877703	-0.94314	-0.810313	-0.872087	-0.840094	-0.839353	-0.945108	-0.955343	-0.867968	-0.978113	-0.927631	-0.863152	-0.778397	-0.97625	-0.888937	-0.761173	-0.95425	-0.93027	-0.86013	-0.791253	-0.81313	-0.789837	-0.857973	-0.913073
1.28849	1.27888	1.29842	1.29549	1.35751	1.28464	1.29838	1.29126	1.29544	1.29501	1.29032	1.28655	1.2884	1.28806	1.30312	1.28595	1.27915	1.29157	1.60237	1.34839	1.56748	1.55283	1.35206	1.51928	1.53244	1.32241	1.57056	1.29601	1.4279	1.3857	1.32551	1.65241	1.31193	1.35484	1.68865	1.31439	1.34496	1.36558	1.75569	1.31832	1.36917	1.95524	1.31863	1.31007	1.34971	1.71631	1.84956	1.40866	1.36656	1.35303
-0.535071	-0.531451	-0.54816	-0.529961	-0.531923	-0.539356	-0.552192	-0.557117	-0.568522	-0.589669	-0.559635	-0.539254	-0.545821	-0.537411	-0.531677	-0.539764	-0.536492	-0.528854	-0.533217	-0.521118	-0.52616	-0.529239	-0.519506	-0.519998	-0.527895	-0.519218	-0.525533	-0.51457	-0.518505	-0.524354	-0.514737	-0.517834	-0.523004	-0.513557	-0.510353	-0.509493	-0.516102	-0.527906	-0.519557	-0.514585	-0.518196	-0.523144	-0.520182	-0.524364	-0.5114	-0.529243	-0.511941	-0.529824	-0.516296	-0.51867
-0.680444	-0.687421	-0.680138	-0.660329	-0.729905	-0.686953	-0.652714	-0.639479	-0.644735	-0.661421	-0.653094	-0.650487	-0.670551	-0.66708	-0.666403	-0.650068	-0.661627	-0.661664	-0.668452	-0.632585	-0.684458	-0.646794	-0.640617	-0.637819	-0.647956	-0.637053	-0.645987	-0.65485	-0.616492	-0.652007	-0.633	-0.630903	-0.681529	-0.612686	-0.603703	-0.640384	-0.70295	-0.632172	-0.669022	-0.646695	-0.656877	-0.618982	-0.61858	-0.666195	-0.658429	-0.668867	-0.65922	-0.629402	-0.617739	-0.627737
0.276935	0.272659	0.26765	0.293036	0.287248	0.302059	0.283825	0.280178	0.27988	0.278452	0.283169	0.282899	0.285134	0.284754	0.273747	0.275962	0.281139	0.280763	0.272147	0.270533	0.278354	0.268829	0.273769	0.270315	0.279199	0.27575	0.26653	0.270628	0.272909	0.278407	0.271556	0.264131	0.271205	0.273136	0.276589	0.276153	0.271759	0.27642	0.264833	0.26591	0.278703	0.271232	0.268245	0.271181	0.274444	0.270711	0.277468	0.26932	0.276031	0.275915
2.66537	2.52252	2.61472	2.39373	2.65977	2.33554	3.15148	3.12854	3.06626	2.85025	3.0861	3.01298	3.05904	2.85606	3.13912	3.12976	3.06664	2.99325	3.81881	3.00695	3.58155	3.61164	2.97918	3.63427	3.64898	2.88362	3.80109	2.70151	4.0303	2.77937	3.51376	4.06404	2.86389	2.80339	4.46661	2.8173	2.99051	3.4091	3.95802	2.94043	3.23877	3.71799	2.86633	2.75688	3.18384	4.42726	4.42518	3.74284	3.15119	3.25417
-1.25281	-1.25281	-1.25281	-1.25281	-1.25281	-1.25281	-1.25281	-1.25281	-1.25281	-1.25281	-1.25281	-1.25281	-1.25281	-1.25281	-1.25281	-1.25281	-1.25281	-1.25281	-1.25281	-1.25281	-1.25281	-1.25281	-1.25281	-1.25281	-1.25281	-1.25281	-1.25281	-1.25281	-1.25281	-1.25281	-1.25281	-1.25281	-1.25281	-1.25281	-1.25281	-1.25281	-1.25281	-1.25281	-1.25281	-1.25281	-1.25281	-1.25281	-1.25281	-1.25281	-1.25281	-1.25281	-1.25281	-1.25281	-1.25281	-1.25281
2.65697	2.6967	2.89766	2.43443	2.41917	2.43138	2.43047	2.40783	2.49489	2.57162	2.39391	2.39804	2.42466	2.42048	2.41951	2.50012	2.38647	2.46169	4.88892	3.82371	5.04631	5.1991	2.72328	4.98503	4.77303	2.79801	4.66181	2.44608	2.97212	3.24449	2.79045	4.28331	2.69977	2.47729	4.61098	2.51972	3.18097	2.67478	4.94982	2.69676	2.80212	5.00593	2.48011	2.43987	3.21244	4.57998	4.77785	2.85351	2.93885	2.49424
-0.833078	-0.829085	-0.839529	-0.833251	-0.920028	-0.839493	-0.837962	-0.836087	-0.83096	-0.854553	-0.834304	-0.826184	-0.837329	-0.83506	-0.848071	-0.825716	-0.838362	-0.839995	-0.939457	-1.17272	-1.08784	-1.02168	-1.10616	-1.18827	-0.843792	-1.08905	-0.832126	-1.34549	-1.14863	-1.2046	-1.19242	-0.975606	-1.34418	-1.29185	-0.895944	-1.17899	-1.11164	-1.30163	-0.84826	-1.15875	-1.16562	-0.843186	-1.20366	-1.27754	-1.2028	-0.945827	-0.903812	-1.31099	-1.27701	-1.32371
-0.0418745	-0.0430635	-0.0412485	-0.0435183	-0.0441902	-0.0434753	-0.0421414	-0.04037	-0.0429402	-0.0434698	-0.0417199	-0.0423323	-0.0422057	-0.0413662	-0.0410008	-0.0410251	-0.0417901	-0.0422816	-0.0443402	-0.0734463	-0.0546496	-0.0509788	-0.0731493	-0.0608251	-0.0408525	-0.0688356	-0.0415636	-0.0641329	-0.0624122	-0.0644559	-0.0668334	-0.0539003	-0.0629067	-0.0675394	-0.055013	-0.0667292	-0.0660785	-0.0630427	-0.0529869	-0.069371	-0.0641052	-0.0631544	-0.0697585	-0.0642713	-0.066468	-0.0579549	-0.0581726	-0.0606981	-0.0669669	-0.0665703
-1.4486	-1.51902	-1.42609	-1.49944	-1.55653	-1.51749	-1.48783	-1.56789	-1.35821	-1.34761	-1.49379	-1.36701	-1.4097	-1.35755	-1.38427	-1.41	-1.39946	-1.3886	-1.39368	-1.53984	-1.40198	-1.39228	-1.62188	-1.46984	-1.3774	-1.49838	-1.44373	-1.71617	-1.77095	-1.44836	-1.83795	-1.4388	-1.85878	-1.61873	-1.55681	-1.61847	-1.58273	-1.72448	-1.51651	-1.69695	-1.96884	-1.64309	-1.54072	-1.78353	-1.55653	-1.5938	-2.04473	-1.59326	-1.41943	-1.67795
0.359847	0.372284	0.364548	0.388713	0.432008	0.380435	0.370486	0.383543	0.372532	0.362018	0.365763	0.344908	0.373519	0.348282	0.3671	0.373346	0.364095	0.342542	0.517162	0.482866	0.444122	0.476601	0.485175	0.469248	0.532234	0.466423	0.523691	0.452907	0.475998	0.465063	0.522849	0.497371	0.463813	0.467872	0.503583	0.433387	0.437744	0.47038	0.453131	0.456661	0.438139	0.494335	0.493325	0.420498	0.487645	0.509993	0.504848	0.473754	0.477521	0.485138
0.936132	0.965809	0.941529	0.945658	0.986987	0.920227	0.93148	0.943833	0.940917	1.06377	0.955812	0.943316	0.940643	0.927065	0.924932	0.945489	0.936484	0.945362	0.935483	0.965316	0.938445	0.926222	0.977794	0.939411	0.941223	0.975406	0.941924	0.920657	0.954571	1.30004	1.00242	1.21	0.936425	0.942141	1.1343	0.914189	0.952376	0.93535	1.48201	0.968986	0.994305	1.87653	0.943294	0.976516	0.943178	1.10921	1.23986	0.938499	1.04938	0.948857
1.96532	1.94086	1.96362	1.94472	1.90167	1.9484	1.89642	1.92734	1.95872	2.13263	1.94214	1.92265	1.97603	1.94474	1.90992	1.93014	1.90478	1.95664	1.96244	1.97404	1.89244	1.97159	1.91366	1.93844	1.88948	1.95856	1.94383	1.92098	1.94627	1.96548	2.06698	2.38497	1.91938	1.91685	1.97519	1.92886	1.87443	1.95735	2.39762	2.0689	2.02432	3.18719	1.92059	1.90583	2.01496	2.12025	2.46784	1.98226	1.8919	1.92132
-0.0360784	-0.0358937	-0.0351549	-0.0357187	-0.0358245	-0.0353027	-0.0359407	-0.0357589	-0.0358938	-0.0359016	-0.0357662	-0.0355409	-0.0359416	-0.0357377	-0.0359049	-0.0359391	-0.035937	-0.0360634	-0.0365425	-0.0357235	-0.0364355	-0.0359514	-0.0361265	-0.0361339	-0.0361119	-0.0356537	-0.036814	-0.0354047	-0.0353935	-0.0361411	-0.0372747	-0.0359622	-0.0363093	-0.0356522	-0.035564	-0.0359843	-0.0364416	-0.0358135	-0.03675	-0.0350873	-0.0356584	-0.0358472	-0.0355127	-0.0363044	-0.0371135	-0.0351898	-0.0390625	-0.0360541	-0.0362891	-0.036709
1.22087	1.24053	1.26831	1.19951	1.3198	1.21118	1.22716	1.1988	1.1941	1.223	1.18618	1.17599	1.19347	1.15845	1.17658	1.17185	1.14003	1.13346	0.944844	1.23032	0.960497	0.985287	1.21635	0.96967	0.964866	1.15109	0.948019	1.16059	1.23315	1.43311	1.287	1.59986	1.14272	1.22339	1.59445	1.24115	1.27642	1.17159	1.68205	1.26056	1.3127	1.69364	1.17287	1.23703	1.23892	1.56396	1.42894	1.07814	1.321	1.26503
0.822859	0.878011	0.850898	0.881138	0.977185	0.895937	0.759107	0.814509	0.748127	0.786449	0.785491	0.743651	0.826492	0.746814	0.787619	0.889887	0.764787	0.739031	0.820874	0.776108	0.807357	0.780393	0.777522	0.836843	0.783351	0.777211	0.772758	0.823274	0.827571	0.806385	0.821588	0.846686	0.812972	0.825731	0.930397	0.810492	0.794454	0.819415	0.885181	0.811898	0.820308	0.918032	0.797123	0.823411	0.784276	0.887863	0.991469	0.834543	0.78743	0.857626
-0.000655332	-0.000799277	-0.000746732	-0.000747814	-0.000918285	-0.000786221	-0.000608738	-0.000586071	-0.000558185	-0.000571104	-0.000597329	-0.000570939	-0.000583342	-0.000573906	-0.000594774	-0.000575676	-0.000572555	-0.00056712	-0.000566303	-0.00106963	-0.000599046	-0.000570491	-0.00109105	-0.000595847	-0.000565882	-0.00111782	-0.000546687	-0.00101593	-0.00107059	-0.00108934	-0.00104266	-0.000646892	-0.00099976	-0.00107861	-0.000669367	-0.00109285	-0.00107488	-0.000961712	-0.000660629	-0.00103482	-0.00108027	-0.000707825	-0.00107488	-0.0010701	-0.0010321	-0.000768562	-0.000860435	-0.000859744	-0.00107488	-0.00101017
0.0613681	0.0609975	0.0610935	0.0605644	0.0616518	0.0622614	0.0608085	0.0623695	0.0610394	0.0617	0.061495	0.0614549	0.0606985	0.0615179	0.0614148	0.0617922	0.061786	0.0617927	0.0595452	0.0608151	0.0614909	0.0608753	0.0616675	0.0606646	0.060484	0.0619934	0.0604376	0.0603327	0.0608046	0.0622241	0.060413	0.0652044	0.0606059	0.0611769	0.0631462	0.061125	0.0618186	0.0616192	0.0646205	0.0614252	0.0606648	0.0672616	0.0608586	0.0608392	0.0595213	0.0637981	0.0660571	0.0605879	0.0615532	0.0621808
-0.801803	-0.811151	-0.81366	-0.811214	-0.85563	-0.846655	-0.817174	-0.806211	-0.821328	-0.859211	-0.818928	-0.821775	-0.803597	-0.821287	-0.811791	-0.79104	-0.802148	-0.813401	-0.80699	-0.835044	-0.873226	-0.875074	-0.897315	-0.92782	-0.820574	-0.867143	-0.804539	-0.874645	-0.886641	-0.865699	-0.829756	-0.801579	-0.850855	-0.87347	-0.80065	-0.895005	-0.892851	-0.878445	-0.802684	-0.858481	-0.833366	-0.813674	-0.814571	-0.900749	-0.810681	-0.812888	-0.805167	-0.836997	-0.859468	-0.867285
3.60848	3.66336	3.93842	3.37804	3.43256	3.31381	3.20147	3.19851	3.42763	3.80706	3.21288	3.24379	3.41336	3.26298	3.27262	3.51552	3.18736	3.2668	5.65489	4.40252	5.44312	5.77072	3.16691	5.26301	5.57256	3.37571	5.44034	2.49516	3.31258	4.40363	3.33363	6.3281	2.62884	2.77334	6.21459	2.85984	3.6346	2.8333	7.40377	3.25272	3.13108	8.59045	2.95007	2.54772	3.8135	6.13582	6.37225	3.12963	3.61459	2.80836
-0.579405	-0.579405	-0.579405	-0.579405	-0.579405	-0.579405	-0.579405	-0.579405	-0.579405	-0.579405	-0.579405	-0.579405	-0.579405	-0.579405	-0.579405	-0.579405	-0.579405	-0.579405	-0.579405	-0.579405	-0.579405	-0.579405	-0.579405	-0.579405	-0.579405	-0.579405	-0.579405	-0.579405	-0.579405	-0.579405	-0.579405	-0.579405	-0.579405	-0.579405	-0.579405	-0.579405	-0.579405	-0.579405	-0.579405	-0.579405	-0.579405	-0.579405	-0.579405	-0.579405	-0.579405	-0.579405	-0.579405	-0.579405	-0.579405	-0.579405
0.258703	0.264224	0.270502	0.311777	0.302097	0.310109	0.30605	0.31115	0.315229	0.310044	0.305048	0.297073	0.302615	0.296825	0.305675	0.302561	0.301757	0.295621	0.25001	0.247945	0.239923	0.239379	0.267364	0.2411	0.252705	0.259273	0.244492	0.254234	0.273004	0.262083	0.284914	0.254518	0.252781	0.259826	0.24999	0.259482	0.266933	0.260575	0.250388	0.28443	0.25921	0.29817	0.252818	0.242365	0.252924	0.264387	0.284205	0.273609	0.244075	0.266886
0.498058	0.470196	0.473238	0.316461	0.397826	0.329537	0.301877	0.335411	0.328903	0.33548	0.312461	0.316843	0.318382	0.347085	0.304991	0.329163	0.308637	0.329792	0.423921	0.438881	0.408301	0.41172	0.416258	0.362754	0.448948	0.46124	0.452306	0.449238	0.488259	0.471926	0.506831	0.326106	0.432424	0.466949	0.319974	0.45612	0.461093	0.375024	0.34465	0.487836	0.477417	0.377662	0.433334	0.446642	0.431837	0.366941	0.407951	0.362054	0.443191	0.481899
5.22445	5.15941	5.21993	5.16968	5.05525	5.17947	5.04128	5.12349	5.20691	5.66921	5.16283	5.11103	5.25293	5.16975	5.07716	5.13092	5.06352	5.20138	5.21678	5.24764	5.0307	5.24111	5.08711	5.15298	5.02284	5.20647	5.16733	5.10658	5.1738	5.22487	5.4947	6.34	5.10232	5.09561	5.25068	5.12754	4.98283	5.20325	6.37363	5.49979	5.38128	8.47257	5.10554	5.0663	5.3564	5.6363	6.56029	5.26948	5.02927	5.10749
-1.27151	-1.18838	-1.32346	-1.17264	-1.72013	-1.3771	-1.16114	-1.14948	-1.124	-1.08586	-1.1289	-1.11359	-1.15573	-1.09387	-1.16625	-1.16117	-1.13108	-1.11405	-1.25796	-1.12627	-1.21324	-1.2201	-1.12445	-1.26798	-1.20992	-1.12959	-1.3335	-1.13485	-1.16455	-1.13632	-1.08536	-1.32794	-1.11006	-1.09635	-1.31971	-1.10618	-1.12995	-1.14151	-1.273	-1.10983	-1.13223	-1.38047	-1.1024	-1.11218	-1.14324	-1.36708	-1.51276	-1.14703	-1.12683	-1.12781
-0.317136	-0.319983	-0.318413	-0.317341	-0.318404	-0.316732	-0.308111	-0.304638	-0.304969	-0.306003	-0.301985	-0.301826	-0.307434	-0.312101	-0.312376	-0.313017	-0.305954	-0.311095	-0.317083	-0.314606	-0.31451	-0.311283	-0.317475	-0.319005	-0.314196	-0.324944	-0.317153	-0.314528	-0.306148	-0.304685	-0.30354	-0.312719	-0.315421	-0.315587	-0.31042	-0.319185	-0.312177	-0.308135	-0.308083	-0.31062	-0.305909	-0.317024	-0.310469	-0.316334	-0.314412	-0.312585	-0.307063	-0.312487	-0.315216	-0.308404
-0.0573165	-0.0533805	-0.0530305	-0.0547345	-0.0509003	-0.050777	-0.0587319	-0.0497649	-0.0369321	-0.0383605	-0.0546514	-0.0665235	-0.0549862	-0.0661035	-0.0586968	-0.0542149	-0.0628996	-0.067563	-0.0644015	-0.045517	-0.0673719	-0.0677966	-0.0423283	-0.0655029	-0.0640216	-0.0428672	-0.0644865	-0.042596	-0.0491858	-0.0417594	-0.045886	-0.0632187	-0.0483296	-0.0360185	-0.0636918	-0.0384097	-0.0468712	-0.0488076	-0.0643083	-0.0443288	-0.047338	-0.0626488	-0.0376682	-0.0439375	-0.0493573	-0.0647337	-0.059613	-0.0483224	-0.0395097	-0.048441
-0.97228	-0.92564	-0.859693	-0.739478	-0.840223	-0.73487	-0.723028	-0.741834	-0.72655	-0.734569	-0.733669	-0.712246	-0.727612	-0.728023	-0.720187	-0.725014	-0.747966	-0.722104	-0.79385	-0.724538	-0.75201	-0.740648	-0.809052	-0.803249	-0.879641	-0.723929	-0.827192	-0.81497	-1.00362	-0.794568	-0.925285	-0.913571	-0.813697	-0.818968	-0.834656	-0.797489	-0.856233	-0.883921	-0.918394	-0.951638	-0.900312	-0.955653	-0.741392	-0.74563	-0.75459	-0.981631	-0.918231	-0.87324	-0.719259	-0.914812
-0.307883	-0.306982	-0.309097	-0.297361	-0.32323	-0.305338	-0.323887	-0.305736	-0.317757	-0.3407	-0.317237	-0.304418	-0.307602	-0.304191	-0.311881	-0.305373	-0.311067	-0.312334	-0.611725	-0.51514	-0.616631	-0.620949	-0.469033	-0.622259	-0.60387	-0.456096	-0.600505	-0.427671	-0.48703	-0.479789	-0.47337	-0.608315	-0.461106	-0.395942	-0.618759	-0.405823	-0.492504	-0.52047	-0.633647	-0.465474	-0.490914	-0.60607	-0.405823	-0.40691	-0.510415	-0.615578	-0.590806	-0.557863	-0.476523	-0.463577
1.22766	1.27957	1.23424	1.3139	1.32805	1.36479	1.28928	1.27131	1.25618	1.27962	1.29547	1.31798	1.30555	1.3405	1.36221	1.32101	1.28866	1.29499	1.30049	1.27952	1.21647	1.25322	1.18437	1.28048	1.28103	1.17991	1.31215	1.18079	1.36058	1.20881	1.23819	1.54783	1.18856	1.19073	1.75056	1.22157	1.22381	1.23002	1.6255	1.22574	1.24567	1.77942	1.20295	1.23096	1.18663	1.64254	1.76955	1.24365	1.23637	1.23253
3.70334	3.79963	3.75482	3.95086	3.25093	3.81969	3.78418	3.9105	4.0176	4.50946	3.95996	3.9649	4.0467	4.07047	3.90125	3.94546	3.8242	4.01523	3.56678	3.90851	3.35223	3.60525	3.61335	3.37991	3.35446	3.85007	3.45403	3.67682	3.7057	3.83116	4.11179	4.66328	3.64807	3.77084	3.84456	3.81821	3.51752	3.58663	4.81733	4.0365	3.90747	7.02655	3.81749	3.78188	3.87637	3.98916	5.05412	3.63045	3.69616	3.64634
-0.836071	-0.836071	-0.836071	-0.836071	-0.836071	-0.836071	-0.836071	-0.836071	-0.836071	-0.836071	-0.836071	-0.836071	-0.836071	-0.836071	-0.836071	-0.836071	-0.836071	-0.836071	-0.836071	-0.836071	-0.836071	-0.836071	-0.836071	-0.836071	-0.836071	-0.836071	-0.836071	-0.836071	-0.836071	-0.836071	-0.836071	-0.836071	-0.836071	-0.836071	-0.836071	-0.836071	-0.836071	-0.836071	-0.836071	-0.836071	-0.836071	-0.836071	-0.836071	-0.836071	-0.836071	-0.836071	-0.836071	-0.836071	-0.836071	-0.836071
0.990925	0.986175	0.998598	0.991131	1.09435	0.998556	0.996734	0.994505	0.988406	1.01647	0.992384	0.982725	0.995981	0.993282	1.00876	0.982168	0.99721	0.999153	1.11746	1.39492	1.29396	1.21526	1.31575	1.41342	1.00367	1.29539	0.989793	1.60042	1.36626	1.43285	1.41835	1.16046	1.59887	1.53662	1.0657	1.40238	1.32227	1.54826	1.00898	1.3783	1.38648	1.00295	1.43172	1.5196	1.43071	1.12504	1.07506	1.55939	1.51897	1.57451
0.511163	0.512487	0.513501	0.558975	0.571807	0.576336	0.510761	0.505594	0.502402	0.499118	0.501004	0.510308	0.528017	0.507532	0.52277	0.500687	0.508833	0.498951	0.675981	0.835863	0.84583	0.846622	0.797792	0.858386	0.700587	0.83602	0.681578	0.838068	0.710125	0.75453	0.784334	0.912035	0.838068	0.786884	0.868204	0.772833	0.814399	0.87573	0.838562	0.792934	0.771465	0.740159	0.785997	0.842282	0.816659	0.855318	0.802117	0.896473	0.77664	0.773279
0.320345	0.315959	0.318013	0.312124	0.314119	0.317278	0.320591	0.320804	0.320295	0.318676	0.320732	0.318991	0.313187	0.320622	0.316143	0.317393	0.321403	0.320496	0.317274	0.317139	0.309575	0.310931	0.323737	0.319296	0.32375	0.326287	0.316736	0.311202	0.311291	0.314405	0.319502	0.310726	0.305928	0.310448	0.320951	0.315642	0.312859	0.327903	0.313346	0.309116	0.304324	0.309312	0.305764	0.313683	0.306974	0.305341	0.31129	0.307705	0.317725	0.317076
-0.240344	-0.239635	-0.244705	-0.249066	-0.251548	-0.244405	-0.243225	-0.241454	-0.249561	-0.243324	-0.244994	-0.242972	-0.243409	-0.243302	-0.242442	-0.244583	-0.237907	-0.240449	-0.260242	-0.307539	-0.244548	-0.238808	-0.322454	-0.247315	-0.250533	-0.32646	-0.241343	-0.273324	-0.38623	-0.33099	-0.33622	-0.280663	-0.277677	-0.314066	-0.358972	-0.333442	-0.336534	-0.275043	-0.327444	-0.328545	-0.344033	-0.326496	-0.321611	-0.291937	-0.30673	-0.350002	-0.381744	-0.262485	-0.308302	-0.295363
-1.22559	-1.23556	-1.2106	-1.22584	-1.23338	-1.21974	-1.23562	-1.22057	-1.24539	-1.19968	-1.23557	-1.22983	-1.23629	-1.22495	-1.22134	-1.20839	-1.23531	-1.23102	-1.22022	-1.23506	-1.21354	-1.20279	-1.22135	-1.23212	-1.22808	-1.20027	-1.24057	-1.21348	-1.22802	-1.25105	-1.25251	-1.27692	-1.22275	-1.21504	-1.27492	-1.21834	-1.22064	-1.21548	-1.23528	-1.22409	-1.24188	-1.21857	-1.22181	-1.21287	-1.24711	-1.24541	-1.22228	-1.22407	-1.19598	-1.25102
-0.372267	-0.350531	-0.391726	-0.361901	-0.469939	-0.426147	-0.333839	-0.296813	-0.295213	-0.298678	-0.301122	-0.27806	-0.30017	-0.287377	-0.313986	-0.298766	-0.292009	-0.280295	-0.42191	-0.300421	-0.325766	-0.306874	-0.319373	-0.371962	-0.340181	-0.315376	-0.293763	-0.344671	-0.418288	-0.398843	-0.409896	-0.49638	-0.402499	-0.302359	-0.549459	-0.326326	-0.363827	-0.314318	-0.526795	-0.326829	-0.391014	-0.634899	-0.298731	-0.361494	-0.344498	-0.535203	-0.611409	-0.373649	-0.353944	-0.311202
0.222041	0.225838	0.219863	0.224699	0.225366	0.225037	0.22461	0.223338	0.223425	0.224067	0.226194	0.224291	0.223709	0.221628	0.226536	0.226947	0.222989	0.22417	0.221694	0.221534	0.225952	0.22237	0.222496	0.220184	0.226517	0.226627	0.220578	0.22693	0.226326	0.222756	0.219208	0.222752	0.21888	0.222965	0.230304	0.231553	0.220143	0.222727	0.224914	0.229834	0.215872	0.228949	0.222877	0.239664	0.224445	0.227434	0.225737	0.22303	0.23092	0.225001
3.80876	3.80751	3.87895	3.84586	3.90424	3.86872	3.80314	3.83832	3.90418	3.88116	3.73481	3.84254	3.88022	3.83046	3.88278	3.82538	3.86052	3.74262	5.65106	6.8523	6.07055	5.92039	7.1149	6.4196	5.21075	7.1149	5.61214	6.94918	7.34231	7.20848	7.30159	6.95906	6.75542	6.87151	7.51449	6.98485	7.16733	7.10593	7.59162	7.14575	7.2764	7.16977	6.82834	6.82834	6.90211	7.2647	7.62357	7.20031	6.904	6.98485
0.434651	0.436669	0.441592	0.453385	0.464113	0.467696	0.370452	0.36392	0.383285	0.394382	0.364799	0.375135	0.383285	0.37408	0.375631	0.372337	0.351073	0.363533	0.370266	0.458696	0.455908	0.439087	0.481304	0.460486	0.345758	0.468137	0.357929	0.524524	0.470651	0.475264	0.499551	0.421042	0.51542	0.510493	0.38616	0.494209	0.495676	0.531141	0.374929	0.498006	0.507198	0.372104	0.496496	0.514486	0.487589	0.394382	0.417114	0.51134	0.478188	0.524311
2.27271	2.16191	2.15898	2.24244	2.16813	2.22033	2.22469	2.22571	2.21286	2.2216	2.27968	2.26259	2.23694	2.23377	2.17249	2.20933	2.24238	2.23859	2.19315	3.90646	2.28663	2.31642	3.79621	2.26738	2.18599	3.96497	2.24183	2.36627	3.52652	3.48286	3.30648	2.47141	2.49779	2.90422	2.71073	3.26843	3.55032	2.6903	2.2509	3.14551	3.45918	2.80965	3.23561	2.86133	3.66426	2.62602	3.02167	2.64853	3.48936	2.69181
1.12472	1.09254	1.09021	1.09521	1.09227	1.08253	1.04491	1.07302	1.25178	1.33105	1.06847	1.05765	1.08011	1.08267	1.06771	1.09148	1.07431	1.08604	2.42604	1.87135	2.37863	2.37349	1.51813	2.38414	2.40945	1.59342	2.35202	1.65229	1.88177	1.60089	1.71534	2.38936	1.92162	1.44313	2.40945	1.59172	1.73063	2.04235	2.34801	1.59132	1.959	2.25156	1.64259	1.69295	1.80472	2.38414	2.21257	2.2141	1.60874	1.58572
-2.09266	-2.077	-2.05407	-2.11608	-2.1146	-2.10316	-2.02844	-2.06964	-2.07486	-2.02786	-2.05502	-2.04454	-2.06638	-2.0794	-2.06389	-2.08711	-2.06086	-2.04902	-2.24378	-2.07463	-2.08363	-2.10073	-2.07871	-2.0665	-2.06978	-2.04999	-2.05558	-2.09224	-2.07789	-2.05327	-2.08509	-2.19206	-2.06508	-2.10116	-2.31801	-2.08854	-2.11039	-2.05676	-2.07519	-2.09672	-2.15691	-2.2557	-2.09356	-2.0887	-2.06036	-2.6197	-2.42672	-2.12364	-2.08305	-2.08227
-1.08566	-1.12963	-1.09201	-1.12075	-1.13524	-1.09848	-1.08851	-1.08464	-1.08717	-1.07476	-1.07509	-1.07434	-1.07673	-1.08598	-1.09271	-1.08283	-1.0805	-1.09449	-1.06436	-1.18357	-1.02719	-1.08837	-1.20164	-1.1164	-1.10077	-1.26235	-1.08303	-1.13198	-1.12957	-1.11948	-1.18066	-1.10513	-1.23829	-1.15147	-1.16529	-1.15205	-1.25733	-1.22409	-1.06428	-1.18718	-1.31659	-1.08449	-1.13824	-1.26418	-1.20314	-1.10739	-1.09948	-1.19265	-1.07081	-1.26463
0.87053	0.885989	0.885076	0.921291	0.880807	0.910685	0.938534	0.942275	0.952753	0.900535	0.942836	0.989555	0.908414	0.925293	0.885739	0.896068	0.905019	0.937284	0.989668	1.30128	1.18745	1.13993	1.22075	1.158	1.00296	1.25419	1.01708	1.46078	1.23637	1.09529	1.21359	1.18033	1.4275	1.34372	1.10432	1.19433	1.14014	1.40509	0.987121	1.2982	1.33076	1.0225	1.38049	1.48558	1.25809	1.09536	1.0949	1.37786	1.3231	1.35602
4.70325	4.55665	4.6756	4.73541	4.67442	4.73916	4.66871	4.7383	4.95112	5.10668	4.68305	4.85797	4.79081	4.73227	4.68813	4.66403	4.74108	4.67949	7.91601	11.2222	9.32374	9.01086	10.8115	9.63052	7.58401	11.0894	8.03935	10.0379	10.9955	10.5976	10.6775	9.83994	10.0371	10.0098	10.1076	10.3012	10.629	10.8277	9.87332	10.3895	10.9242	9.55073	10.4199	10.2427	10.8977	9.58394	10.2063	10.9262	10.7995	9.99202
-1.73758	-1.73758	-1.73758	-1.73758	-1.73758	-1.73758	-1.73758	-1.73758	-1.73758	-1.73758	-1.73758	-1.73758	-1.73758	-1.73758	-1.73758	-1.73758	-1.73758	-1.73758	-1.73758	-1.73758	-1.73758	-1.73758	-1.73758	-1.73758	-1.73758	-1.73758	-1.73758	-1.73758	-1.73758	-1.73758	-1.73758	-1.73758	-1.73758	-1.73758	-1.73758	-1.73758	-1.73758	-1.73758	-1.73758	-1.73758	-1.73758	-1.73758	-1.73758	-1.73758	-1.73758	-1.73758	-1.73758	-1.73758	-1.73758	-1.73758
1.30264	1.27459	1.28049	1.28943	1.6644	1.32798	1.18858	1.21286	1.1517	1.16991	1.15877	1.18897	1.16234	1.18848	1.20037	1.21146	1.15424	1.20937	1.38988	1.23371	1.22857	1.21748	1.25764	1.31668	1.43569	1.28371	1.44515	1.22605	1.32844	1.29085	1.35507	1.31527	1.24044	1.22219	1.31114	1.11923	1.26216	1.19241	1.29147	1.23968	1.15269	1.49442	1.1891	1.2339	1.20064	1.30775	1.3932	1.21681	1.21661	1.1747
-0.922737	-0.901634	-0.877045	-1.0139	-0.988142	-0.961508	-0.947116	-0.902578	-0.898838	-0.904745	-0.938868	-0.976014	-0.951372	-0.986587	-0.967975	-0.883808	-0.938177	-0.97791	-0.797629	-1.04852	-1.0308	-0.950411	-1.08972	-1.07589	-0.681305	-1.06296	-0.73178	-0.955549	-1.01235	-1.1024	-1.10961	-0.862263	-0.846659	-1.02686	-0.756584	-1.02796	-1.07075	-0.802459	-0.789207	-1.06578	-0.964707	-0.911377	-0.883913	-0.94751	-1.04286	-0.947317	-0.925839	-0.887941	-0.998733	-0.979894
-0.547876	-0.572091	-0.549839	-0.551091	-0.546006	-0.55917	-0.56373	-0.554462	-0.550801	-0.558135	-0.559234	-0.566577	-0.565248	-0.554504	-0.563329	-0.567673	-0.553903	-0.563702	-0.583228	-0.547585	-0.551799	-0.558365	-0.621867	-0.668499	-0.616292	-0.566244	-0.556935	-0.565738	-0.822621	-0.645636	-0.651884	-1.08081	-0.559093	-0.559114	-1.16476	-0.60582	-0.616835	-0.614648	-1.13872	-0.618691	-0.721835	-1.0926	-0.552517	-0.59569	-0.56104	-1.13149	-1.17303	-0.721262	-0.583807	-0.552068
1.25832	1.25615	1.28576	1.25203	1.28912	1.26772	1.30433	1.32024	1.32301	1.33367	1.31162	1.26349	1.30753	1.26396	1.27889	1.29577	1.31697	1.26706	1.25294	1.34913	1.31323	1.28354	1.42141	1.31272	1.25857	1.45395	1.25897	1.72307	1.56775	1.44645	1.50223	1.79675	1.63932	1.50094	2.04154	1.44079	1.37886	1.64068	1.82692	1.58843	1.62654	1.59346	1.39371	1.64601	1.34688	1.60083	1.51453	1.48084	1.3428	1.63361
0.43493	0.424427	0.4303	0.436776	0.433588	0.435303	0.424875	0.424713	0.425036	0.424894	0.421587	0.427877	0.423041	0.423416	0.426671	0.425943	0.421251	0.429189	0.451918	0.474329	0.43288	0.43403	0.548491	0.47555	0.44247	0.474172	0.429318	0.462264	0.51431	0.537191	0.465272	0.45932	0.470673	0.546837	0.447286	0.592011	0.589479	0.465958	0.428531	0.571459	0.571105	0.455246	0.539623	0.504675	0.482383	0.440332	0.453122	0.460241	0.459543	0.500883
0.0691556	0.0672645	0.0691588	0.0679993	0.0703192	0.0670514	0.0697044	0.0699079	0.069168	0.0702137	0.0702009	0.0693176	0.070166	0.06898	0.0691468	0.0703625	0.0699604	0.0692216	0.070031	0.067092	0.0684994	0.0700884	0.0679699	0.0676347	0.0686009	0.0676113	0.0701115	0.0663339	0.0665152	0.065919	0.0654564	0.0668571	0.0667873	0.0652219	0.0678796	0.0674229	0.0650303	0.0650992	0.0670027	0.0664219	0.0665493	0.0744085	0.0656901	0.0663808	0.0665589	0.0666586	0.0661737	0.0648062	0.0665326	0.0676617
0.294063	0.298162	0.280716	0.266789	0.267764	0.256875	0.327978	0.327734	0.33374	0.334995	0.331768	0.324507	0.331705	0.32965	0.324179	0.328776	0.342452	0.325463	0.273015	0.264404	0.271596	0.280344	0.263347	0.265469	0.26904	0.267375	0.269516	0.25081	0.244807	0.247434	0.242435	0.230354	0.238874	0.235551	0.236284	0.245461	0.252718	0.243742	0.223903	0.252422	0.255508	0.236638	0.250216	0.255796	0.24738	0.241938	0.233157	0.239	0.248805	0.253556
0.689677	0.702233	0.671972	0.667755	0.689336	0.674687	0.724704	0.737694	0.747699	0.737427	0.742323	0.725635	0.727972	0.718975	0.728194	0.736385	0.750963	0.728817	0.672855	0.672896	0.688527	0.679776	0.673036	0.671767	0.71494	0.682151	0.683864	0.654096	0.681602	0.663	0.656052	0.652938	0.668562	0.667054	0.660695	0.656475	0.672988	0.678737	0.633672	0.668369	0.655547	0.650222	0.674592	0.665082	0.667061	0.656964	0.66345	0.660318	0.652956	0.679575
1.26622	1.39813	1.32959	1.36999	1.54474	1.39945	0.97362	0.891197	0.836666	0.930176	0.954305	0.772906	0.9877	0.786611	0.954716	1.03402	0.852223	0.781756	0.848248	0.958576	0.761312	0.75859	0.900193	0.762938	0.777377	0.956817	0.754443	0.831232	0.9849	1.03551	0.865454	0.902069	0.857619	0.794202	1.17703	0.82314	0.915731	0.825388	1.1163	0.88061	0.882574	1.31646	0.871885	0.88847	0.903307	1.20196	1.33407	0.799307	0.934006	0.836666
-1.45107	-1.34763	-1.35324	-1.88732	-1.74207	-1.94604	-1.50989	-1.15726	-1.07879	-1.4432	-1.3996	-1.11642	-1.60196	-1.11699	-1.63742	-1.48932	-1.42681	-1.19515	-1.12786	-1.01718	-1.23993	-1.18531	-1.04655	-1.48587	-1.01461	-1.01155	-1.01686	-1.05605	-1.23264	-1.1701	-1.17266	-1.86115	-1.08398	-1.03918	-1.89098	-1.0823	-1.16452	-1.18939	-1.79535	-1.07401	-1.35677	-1.94329	-1.05473	-1.06049	-1.09327	-1.89497	-1.98406	-1.26548	-1.11568	-1.04441
1.04381	0.992921	0.991575	1.0299	0.995777	1.01975	1.02175	1.02222	1.01632	1.02033	1.04701	1.03916	1.02738	1.02593	0.99778	1.0147	1.02988	1.02814	1.00727	1.79415	1.0502	1.06388	1.74352	1.04136	1.00398	1.82103	1.02963	1.08678	1.61966	1.5996	1.5186	1.13507	1.14718	1.33385	1.24498	1.50112	1.63059	1.2356	1.03379	1.44467	1.58873	1.29041	1.48605	1.31415	1.68292	1.20607	1.38779	1.21641	1.60259	1.23629
0.257685	0.264658	0.258397	0.263935	0.273419	0.261484	0.261126	0.264664	0.264985	0.267743	0.266141	0.26618	0.266182	0.265662	0.268679	0.258633	0.264813	0.259711	0.257801	0.265932	0.26439	0.268515	0.266448	0.272488	0.259216	0.265141	0.257555	0.281554	0.28411	0.260602	0.28869	0.261467	0.285234	0.255171	0.265175	0.261761	0.26264	0.276807	0.256892	0.267629	0.289392	0.262899	0.258208	0.264709	0.271692	0.261977	0.26216	0.261506	0.256595	0.270324
-0.700558	-0.695333	-0.705957	-0.704364	-0.738083	-0.698466	-0.705933	-0.702061	-0.704334	-0.704099	-0.701554	-0.699501	-0.700509	-0.700322	-0.708509	-0.699177	-0.695479	-0.702229	-0.871212	-0.733126	-0.852242	-0.844277	-0.735118	-0.826039	-0.833193	-0.719001	-0.853921	-0.704645	-0.776357	-0.75341	-0.720684	-0.898422	-0.713304	-0.736629	-0.918126	-0.71464	-0.731261	-0.74247	-0.954573	-0.716775	-0.744423	-1.06307	-0.716941	-0.712292	-0.733841	-0.933163	-1.00561	-0.765895	-0.743006	-0.735647
1.8414	1.91598	1.85217	1.90091	1.92549	1.86313	1.84624	1.83967	1.84395	1.82291	1.82347	1.82219	1.82626	1.84194	1.85335	1.8366	1.83264	1.85638	1.80527	2.00747	1.74223	1.84599	2.03811	1.89353	1.86702	2.14108	1.83693	1.91997	1.91588	1.89876	2.00253	1.87443	2.10027	1.95301	1.97646	1.95401	2.13256	2.07619	1.80513	2.01359	2.23308	1.83942	1.93058	2.14419	2.04066	1.87826	1.86484	2.02287	1.81621	2.14495
0.323192	0.333874	0.3298	0.330826	0.380392	0.337735	0.365831	0.337048	0.317895	0.314255	0.349859	0.335064	0.364236	0.342263	0.364875	0.351569	0.3735	0.357747	0.335145	0.314277	0.327888	0.337094	0.314769	0.345785	0.340457	0.311048	0.320472	0.330732	0.324946	0.313476	0.338173	0.357863	0.349389	0.308034	0.381292	0.310574	0.331553	0.315681	0.326535	0.308746	0.336439	0.340381	0.311944	0.313958	0.32365	0.360244	0.417183	0.308672	0.308147	0.323147
0.128445	0.125015	0.127829	0.127586	0.11971	0.128206	0.1403	0.141629	0.140377	0.137243	0.136863	0.142046	0.140125	0.138526	0.13602	0.136195	0.136308	0.13546	0.113643	0.121142	0.114903	0.110804	0.122726	0.114895	0.108395	0.125055	0.115735	0.108761	0.112773	0.114013	0.113309	0.118152	0.1153	0.113208	0.120625	0.112712	0.114509	0.114009	0.116336	0.110563	0.114758	0.11288	0.119886	0.111913	0.117838	0.11483	0.115626	0.11325	0.117819	0.11129
3.54971	3.79913	3.68408	3.10967	3.90217	3.1366	3.18478	3.53564	3.5002	3.216	3.27707	3.28125	3.07796	3.29839	2.98807	3.32286	3.19324	3.27174	3.36049	4.43912	2.85187	3.07418	4.38683	2.74695	3.66277	4.7518	3.57461	3.92209	4.06414	4.06367	4.02085	2.7303	4.23903	3.8959	3.46236	3.9164	4.28787	4.04374	2.71106	4.19975	4.2476	2.91892	4.1458	4.35567	4.18237	2.69331	2.87919	3.46586	3.84381	4.18305
-0.952233	-0.952233	-0.952233	-0.952233	-0.952233	-0.952233	-0.952233	-0.952233	-0.952233	-0.952233	-0.952233	-0.952233	-0.952233	-0.952233	-0.952233	-0.952233	-0.952233	-0.952233	-0.952233	-0.952233	-0.952233	-0.952233	-0.952233	-0.952233	-0.952233	-0.952233	-0.952233	-0.952233	-0.952233	-0.952233	-0.952233	-0.952233	-0.952233	-0.952233	-0.952233	-0.952233	-0.952233	-0.952233	-0.952233	-0.952233	-0.952233	-0.952233	-0.952233	-0.952233	-0.952233	-0.952233	-0.952233	-0.952233	-0.952233	-0.952233
2.21159	2.18461	2.23501	2.21741	2.37727	2.22627	2.24477	2.23056	2.24512	2.23747	2.26589	2.20519	2.24455	2.24779	2.24283	2.26606	2.24606	2.23959	2.22108	2.29911	2.26588	2.1863	2.26891	2.22497	2.18368	2.30375	2.2258	2.13957	2.32005	2.32629	2.22344	2.19626	2.15177	2.29346	2.26251	2.20751	2.31155	2.25353	2.37959	2.25845	2.21117	2.27448	2.28464	2.23917	2.23757	2.2514	2.13789	2.22769	2.22779	2.22393
3.45112	3.44146	3.46974	3.50803	3.55988	3.40181	3.51639	3.43084	3.48282	3.46566	3.47343	3.53933	3.53532	3.51787	3.49156	3.5642	3.49687	3.52223	3.49418	4.22481	3.6045	3.65679	4.37188	3.51612	3.50924	4.29867	3.50807	4.151	4.42544	4.09282	4.32602	3.45971	4.15538	4.35959	3.65057	4.24541	4.24138	4.16654	3.45886	4.47623	4.41116	3.57306	4.23973	4.31561	4.15893	3.50173	3.46541	4.03006	4.14901	4.34951
0.186181	0.188655	0.187682	0.183777	0.187303	0.186559	0.186244	0.186083	0.18937	0.18801	0.184516	0.18981	0.186158	0.187163	0.18462	0.188776	0.18912	0.18809	0.225561	0.190656	0.198413	0.189787	0.196059	0.201074	0.232196	0.193953	0.227925	0.18525	0.189576	0.18596	0.187938	0.220778	0.190557	0.186495	0.212408	0.189222	0.188861	0.185715	0.189824	0.190585	0.187262	0.20688	0.188738	0.190396	0.189725	0.206493	0.224344	0.190344	0.184161	0.191102
-2.18772	-2.26834	-2.31528	-2.28428	-2.36575	-2.39934	-2.0329	-2.11284	-2.18392	-2.09855	-2.09321	-2.05364	-2.09418	-2.04822	-2.0936	-2.12472	-2.05399	-1.98884	-1.97548	-2.33508	-2.1495	-1.92157	-2.43534	-2.28595	-1.88774	-2.35589	-1.86174	-2.45427	-2.70802	-2.52893	-2.62663	-2.1955	-2.47224	-2.4452	-2.16602	-2.49166	-2.54491	-2.55985	-1.97424	-2.47661	-2.51055	-2.3123	-2.41327	-2.37026	-2.48658	-2.28496	-2.66973	-2.64499	-2.4364	-2.60624
0.348817	0.352883	0.344183	0.369484	0.342055	0.377101	0.362648	0.359172	0.35706	0.355753	0.367502	0.358641	0.360843	0.355182	0.360389	0.353528	0.364423	0.360785	0.352835	0.364056	0.35187	0.355676	0.373927	0.357894	0.356965	0.369518	0.361623	0.374682	0.385204	0.371616	0.389665	0.378037	0.365061	0.382854	0.360068	0.376813	0.386345	0.366697	0.361572	0.383077	0.369209	0.374902	0.366914	0.371901	0.361266	0.366033	0.376141	0.368724	0.375506	0.35574
-0.0383542	-0.0361148	-0.0403591	-0.0372862	-0.0484171	-0.0439054	-0.0343949	-0.0305803	-0.0304155	-0.0307724	-0.0310242	-0.0286482	-0.0309261	-0.029608	-0.0323496	-0.0307815	-0.0300853	-0.0288784	-0.0434688	-0.030952	-0.0335632	-0.0316169	-0.0329046	-0.0383227	-0.0350484	-0.0324928	-0.0302661	-0.035511	-0.0430957	-0.0410923	-0.042231	-0.0511414	-0.0414689	-0.0311516	-0.05661	-0.0336209	-0.0374847	-0.0323838	-0.0542749	-0.0336727	-0.0402857	-0.0654128	-0.0307778	-0.0372443	-0.0354932	-0.0551412	-0.0629926	-0.0384966	-0.0364664	-0.0320627
-0.323156	-0.318919	-0.323156	-0.312618	-0.320859	-0.314747	-0.272214	-0.265797	-0.254372	-0.257519	-0.263964	-0.272656	-0.271854	-0.275808	-0.273028	-0.270357	-0.274381	-0.281751	-0.296263	-0.284379	-0.296079	-0.285197	-0.299503	-0.301734	-0.291568	-0.297852	-0.298252	-0.309638	-0.301973	-0.302973	-0.312618	-0.303468	-0.311051	-0.308974	-0.299935	-0.303212	-0.303984	-0.30803	-0.302466	-0.305862	-0.299296	-0.299723	-0.304781	-0.309973	-0.306157	-0.302466	-0.299296	-0.309638	-0.305046	-0.306157
-0.629371	-0.637983	-0.653511	-0.67978	-0.713751	-0.703222	-0.52735	-0.548426	-0.449505	-0.529216	-0.517009	-0.429878	-0.552182	-0.440146	-0.576469	-0.578035	-0.483943	-0.457862	-0.69846	-0.663123	-0.703022	-0.715005	-0.636286	-0.705769	-0.690153	-0.653411	-0.657843	-0.687051	-0.636729	-0.641042	-0.622902	-0.71684	-0.714775	-0.623828	-0.663585	-0.628628	-0.637091	-0.697599	-0.64795	-0.624833	-0.674332	-0.702298	-0.665082	-0.66869	-0.645036	-0.713333	-0.698111	-0.666262	-0.659378	-0.663691
0.451477	0.454489	0.462817	0.547166	0.559373	0.534382	0.55618	0.501867	0.393969	0.410414	0.540768	0.536738	0.533182	0.508373	0.552795	0.483193	0.550881	0.551046	0.567285	0.338281	0.418027	0.375851	0.376392	0.449627	0.575654	0.363756	0.593556	0.35858	0.419262	0.396644	0.465513	0.399804	0.364858	0.359023	0.444308	0.34294	0.411329	0.383625	0.419565	0.379554	0.385029	0.42275	0.336657	0.363881	0.396579	0.438481	0.531999	0.388805	0.341328	0.398943
-0.647008	-0.600883	-0.603388	-0.841521	-0.776758	-0.867706	-0.673232	-0.516002	-0.481012	-0.643499	-0.624059	-0.497793	-0.714287	-0.498046	-0.730096	-0.664061	-0.63619	-0.532896	-0.502895	-0.453544	-0.552863	-0.528511	-0.466639	-0.662522	-0.452396	-0.451033	-0.453399	-0.470873	-0.549614	-0.521728	-0.52287	-0.829855	-0.483327	-0.463354	-0.843154	-0.48258	-0.519238	-0.530329	-0.800514	-0.47888	-0.604959	-0.86648	-0.470286	-0.472855	-0.487471	-0.844932	-0.884656	-0.564257	-0.497461	-0.465685
-0.468006	-0.445191	-0.444587	-0.461772	-0.446471	-0.45722	-0.458118	-0.458329	-0.455682	-0.457481	-0.469443	-0.465922	-0.46064	-0.459989	-0.447369	-0.454955	-0.46176	-0.46098	-0.451622	-0.804435	-0.470873	-0.477007	-0.781733	-0.466908	-0.450149	-0.816485	-0.461648	-0.487272	-0.726196	-0.717205	-0.680885	-0.508924	-0.514356	-0.598051	-0.558205	-0.67305	-0.731098	-0.553999	-0.463515	-0.647737	-0.712329	-0.578576	-0.666292	-0.589218	-0.75456	-0.540761	-0.622235	-0.545397	-0.718545	-0.554309
0.610651	0.612104	0.595824	0.617939	0.624663	0.614564	0.614425	0.608286	0.60813	0.607068	0.619344	0.605769	0.61201	0.619978	0.610346	0.604943	0.615994	0.61303	0.819615	0.623906	0.631037	0.615586	0.614792	0.653816	0.838629	0.619581	0.914641	0.612044	0.790126	0.631334	0.782059	0.782777	0.604773	0.625057	0.857539	0.611073	0.636439	0.637538	0.917374	0.678477	0.685422	0.850365	0.631423	0.617511	0.626716	0.952252	0.911109	0.710694	0.637819	0.721083
0.221647	0.223806	0.208379	0.189659	0.197493	0.183358	0.188094	0.191705	0.188216	0.188446	0.18942	0.184443	0.187177	0.183171	0.185059	0.187651	0.186149	0.185061	0.223832	0.184048	0.189025	0.189208	0.182904	0.18404	0.226796	0.183867	0.250585	0.180833	0.187194	0.185385	0.185693	0.202871	0.17909	0.184081	0.235574	0.181476	0.17799	0.183399	0.229158	0.183426	0.182159	0.205535	0.180131	0.184057	0.185499	0.19909	0.217421	0.181672	0.180955	0.182913
0.130861	0.135582	0.131947	0.133725	0.131079	0.130454	0.134015	0.133268	0.132502	0.134503	0.13522	0.132746	0.134335	0.135391	0.134335	0.134627	0.134052	0.133812	0.131304	0.130526	0.132711	0.130747	0.132531	0.133451	0.130804	0.133565	0.131708	0.132156	0.134216	0.132463	0.132741	0.134256	0.132448	0.133331	0.131554	0.132136	0.131357	0.132044	0.132305	0.136052	0.134027	0.131979	0.132293	0.130919	0.131965	0.132786	0.132991	0.132699	0.132819	0.13208
2.36649	2.33392	2.30306	2.1977	2.35487	1.91612	2.85232	2.75758	2.79005	2.61806	2.82515	3.0519	2.71728	3.05087	2.65679	2.70784	2.89096	3.0902	3.11527	2.83164	2.63333	2.7888	2.91276	2.30755	3.29467	2.90726	3.49853	2.73726	2.93321	2.61731	2.9327	2.21653	2.65449	3.1011	2.61479	2.7216	2.75922	2.67467	2.89305	3.16603	2.77145	2.26293	2.8578	3.01298	2.62072	2.35443	1.80806	2.50942	2.62386	2.97493
[truncated: 23 more columns]

## Sheet: GSE49604
GSM1202479	GSM1202480	GSM1202481	GSM1202485	GSM1202486	GSM1202487	entrez	gene	class
1.04445	1.04445	1.04445	1.04445	1.04445	1.04445	(Intercept)		M0
-1.8591	-1.84928	-1.88229	-1.82156	-1.84481	-1.88044	10148	EBI3	M0
0.0985371	0.0930483	0.09882	0.0873546	0.100492	0.104982	10964	IFI44L	M0
0.0122018	0.0118881	0.0119098	0.0120823	0.0121742	0.011817	2	A2M	M0
-0.523702	-0.521977	-0.519451	-0.537653	-0.531097	-0.507622	2289	FKBP5	M0
0.591502	0.61494	0.626775	0.616999	0.615822	0.600308	23166	STAB1	M0
1.35654	1.23388	1.28419	1.31682	1.342	1.32085	2517	FUCA1	M0
1.22863	1.2395	1.17351	1.24608	1.22996	1.26958	2760	GM2A	M0
1.91918	1.82844	1.87065	1.88393	1.94543	1.86792	3357	HTR2B	M0
-0.793256	-0.802515	-0.821596	-0.830196	-0.831067	-0.821639	347902	AMIGO2	M0
-0.589496	-0.58509	-0.581583	-0.570238	-0.575186	-0.584099	3620	IDO1	M0
0.00822693	0.00843901	0.00822064	0.00835606	0.00812442	0.0082211	3627	CXCL10	M0
0.0813304	0.0929934	0.0871719	0.0830077	0.0901391	0.083889	4495	MT1G	M0
1.24562	1.28029	1.25007	1.25655	1.26671	1.26935	54209	TREM2	M0
0.133058	0.133042	0.134455	0.133942	0.133532	0.131867	6035	RNASE1	M0
-1.08415	-1.10545	-1.13841	-1.08555	-1.04724	-1.10018	6362	CCL18	M0
-0.79346	-0.906289	-0.883193	-0.774513	-0.886416	-0.786191	64116	SLC39A8	M0
-0.923478	-0.935409	-0.916133	-0.87942	-0.927618	-0.834833	6504	SLAMF1	M0
-0.0213035	-0.0233006	-0.0224697	-0.0206493	-0.0205773	-0.022489	654	BMP6	M0
0.248299	0.24303	0.251955	0.245191	0.243366	0.245122	6653	SORL1	M0
1.40311	1.38671	1.34032	1.37798	1.36329	1.36003	6881	TAF10	M0
-0.311403	-0.331921	-0.316411	-0.343772	-0.339912	-0.328817	7035	TFPI	M0
1.07676	1.16067	1.18037	1.16786	1.16261	1.17283	7078	TIMP3	M0
1.20216	1.18043	1.13636	1.13933	1.11757	1.06201	8536	CAMK1	M0
-0.104105	-0.0980686	-0.102454	-0.104399	-0.101796	-0.102829	8853	ASAP2	M0
0.649278	0.648581	0.645217	0.645283	0.643063	0.651841	9214	FCMR	M0
0.380975	0.394533	0.395793	0.37999	0.39422	0.378076	9398	CD101	M0
-0.387018	-0.396257	-0.40105	-0.40925	-0.419058	-0.427903	961	CD47	M0
1.53223	1.47164	1.5208	1.51453	1.51057	1.49827	9966	TNFSF15	M0
6.8216	6.51094	6.476	6.78253	6.69875	6.68437	Sum		M0
0.852937	0.852937	0.852937	0.852937	0.852937	0.852937	(Intercept)		M-LPSearly
-0.685599	-0.66919	-0.676795	-0.631221	-0.634007	-0.643755	2353	FOS	M-LPSearly
0.599644	0.586578	0.620718	0.614259	0.599994	0.630846	2919	CXCL1	M-LPSearly
-3.28463	-3.09298	-3.22435	-3.21342	-3.24703	-3.13503	3148	HMGB2	M-LPSearly
4.04658	3.7951	3.917	4.2179	4.02702	3.91231	5806	PTX3	M-LPSearly
-0.352822	-0.342287	-0.343415	-0.366774	-0.358778	-0.341695	60370	AVPI1	M-LPSearly
-0.516885	-0.522989	-0.522494	-0.52313	-0.522277	-0.515002	6128	RPL6	M-LPSearly
-0.839096	-0.80469	-0.824836	-0.833363	-0.83984	-0.842552	6133	RPL9	M-LPSearly
-0.338743	-0.353689	-0.340209	-0.322987	-0.351555	-0.342248	6446	SGK1	M-LPSearly
2.5041	2.45158	2.45339	2.43945	2.45112	2.43395	7124	TNF	M-LPSearly
1.46462	1.56551	1.4697	1.43556	1.44031	1.54654	7130	TNFAIP6	M-LPSearly
3.45011	3.46588	3.38165	3.66922	3.41789	3.55631	Sum		M-LPSearly
3.45589	3.45589	3.45589	3.45589	3.45589	3.45589	(Intercept)		M-LPSlate
0.0946002	0.0941006	0.0957804	0.0926903	0.0938731	0.0956862	10148	EBI3	M-LPSlate
-0.036728	-0.03664	-0.0381676	-0.038473	-0.0394596	-0.0375831	1043	CD52	M-LPSlate
0.131242	0.123931	0.131619	0.116348	0.133845	0.139826	10964	IFI44L	M-LPSlate
-0.466475	-0.482197	-0.466999	-0.473346	-0.47484	-0.468907	1192	CLIC1	M-LPSlate
0.437433	0.434593	0.434003	0.422724	0.445098	0.44505	25862	USP49	M-LPSlate
-0.311197	-0.304416	-0.322134	-0.318782	-0.311379	-0.32739	2919	CXCL1	M-LPSlate
1.2783	1.48127	1.39861	1.20908	1.16493	1.19062	3575	IL7R	M-LPSlate
1.35559	1.34546	1.33739	1.3113	1.32268	1.34318	3620	IDO1	M-LPSlate
-1.22733	-1.25897	-1.22639	-1.24659	-1.21204	-1.22646	3627	CXCL10	M-LPSlate
-0.226889	-0.226872	-0.230654	-0.230536	-0.232368	-0.22739	3695	ITGB7	M-LPSlate
-0.0809532	-0.0784503	-0.0772005	-0.0810325	-0.0799549	-0.0783318	4283	CXCL9	M-LPSlate
0.668178	0.763997	0.71617	0.681958	0.740547	0.689199	4495	MT1G	M-LPSlate
0.30898	0.313392	0.311594	0.311517	0.309369	0.308788	5866	RAB3IL1	M-LPSlate
-0.818052	-0.800694	-0.830098	-0.807813	-0.8018	-0.807585	6653	SORL1	M-LPSlate
1.72468	1.84348	1.73066	1.69046	1.69606	1.82115	7130	TNFAIP6	M-LPSlate
-0.529954	-0.542164	-0.526073	-0.530625	-0.530692	-0.537034	8857	FCGBP	M-LPSlate
-0.796668	-0.796565	-0.817253	-0.790406	-0.791314	-0.80878	9592	IER2	M-LPSlate
0.296349	0.30078	0.288921	0.297598	0.286875	0.293705	9832	JAKMIP2	M-LPSlate
5.25699	5.62992	5.36566	5.07196	5.17532	5.26362	Sum		M-LPSlate
-1.25281	-1.25281	-1.25281	-1.25281	-1.25281	-1.25281	(Intercept)		M-LPS+IFNγ
2.42874	2.41592	2.45904	2.37971	2.41008	2.45663	10148	EBI3	M-LPS+IFNγ
-0.87102	-0.857314	-0.853106	-0.837741	-0.881789	-0.889874	10462	CLEC10A	M-LPS+IFNγ
-0.0920228	-0.0822964	-0.0917819	-0.0903414	-0.0888944	-0.0870877	2012	EMP1	M-LPS+IFNγ
-1.97993	-1.87385	-1.97919	-1.9499	-1.89386	-1.98952	27242	TNFRSF21	M-LPS+IFNγ
0.55689	0.579994	0.560934	0.533148	0.53603	0.528432	3005	H1F0	M-LPS+IFNγ
0.284407	0.28228	0.280589	0.275115	0.277503	0.281802	3620	IDO1	M-LPS+IFNγ
0.989131	1.01463	0.988376	1.00466	0.976807	0.988431	3627	CXCL10	M-LPS+IFNγ
1.92684	1.86726	1.83752	1.92872	1.90308	1.86444	4283	CXCL9	M-LPS+IFNγ
-0.0388056	-0.0378267	-0.0381872	-0.0382184	-0.0382117	-0.039189	4327	MMP19	M-LPS+IFNγ
0.989205	0.996521	0.991217	1.01536	0.984979	1.01381	4600	MX2	M-LPS+IFNγ
0.938528	0.939082	0.97629	0.847885	0.959431	0.850218	5265	SERPINA1	M-LPS+IFNγ
-0.000587095	-0.000580937	-0.000582816	-0.000586611	-0.000586223	-0.000598561	64231	MS4A6A	M-LPS+IFNγ
0.0842211	0.0743201	0.077475	0.0799392	0.0790595	0.0738838	710	SERPING1	M-LPS+IFNγ
-1.31671	-1.38834	-1.3987	-1.41692	-1.45472	-1.43103	928	CD9	M-LPS+IFNγ
2.64608	2.677	2.55709	2.47803	2.51609	2.36753	Sum		M-LPS+IFNγ
-0.579405	-0.579405	-0.579405	-0.579405	-0.579405	-0.579405	(Intercept)		M-IFNγ
0.195701	0.186167	0.211014	0.199339	0.188078	0.197728	10507	SEMA4D	M-IFNγ
0.305764	0.297771	0.309077	0.305253	0.306647	0.311438	3111	HLA-DOA	M-IFNγ
5.12214	4.96378	4.8847	5.12716	5.05898	4.95628	4283	CXCL9	M-IFNγ
-1.22896	-1.20614	-1.18512	-1.22444	-1.17479	-1.21286	50486	G0S2	M-IFNγ
-0.475299	-0.445762	-0.460079	-0.495422	-0.473001	-0.459528	5806	PTX3	M-IFNγ
-0.0405957	-0.038783	-0.0386873	-0.0396244	-0.0381543	-0.0401793	5996	RGS1	M-IFNγ
-1.17103	-1.05542	-1.04133	-1.25487	-1.23822	-1.11304	6518	SLC2A5	M-IFNγ
-0.635432	-0.624172	-0.633093	-0.618948	-0.618858	-0.626253	6624	FSCN1	M-IFNγ
1.36998	1.37876	1.3664	1.34552	1.3277	1.33647	9941	EXOG	M-IFNγ
2.86287	2.87679	2.83348	2.76457	2.75899	2.77065	Sum		M-IFNγ
-0.836071	-0.836071	-0.836071	-0.836071	-0.836071	-0.836071	(Intercept)		M-IL4
1.03606	1.01975	1.01475	0.996472	1.04887	1.05848	10462	CLEC10A	M-IL4
1.00968	1.02346	1.02447	1.01214	0.983402	1.00985	23022	PALLD	M-IL4
0.329393	0.320308	0.330403	0.324889	0.327657	0.324526	23397	NCAPH	M-IL4
-0.328701	-0.332048	-0.339161	-0.323845	-0.32136	-0.334723	25903	OLFML2B	M-IL4
-1.37559	-1.31055	-1.3408	-1.35032	-1.3944	-1.33885	3357	HTR2B	M-IL4
-0.283294	-0.289858	-0.281503	-0.277212	-0.284131	-0.288468	3553	IL1B	M-IL4
-0.585719	-0.58134	-0.577856	-0.566584	-0.571501	-0.580356	3620	IDO1	M-IL4
0.229235	0.243103	0.237819	0.247047	0.248541	0.227543	387509	GPR153	M-IL4
4.48322	4.70584	4.70064	4.81693	4.61533	4.12255	4128	MAOA	M-IL4
0.45157	0.432146	0.416611	0.433653	0.436823	0.433518	54518	APBB1IP	M-IL4
2.24715	2.29131	2.35962	2.25005	2.17066	2.28037	6362	CCL18	M-IL4
1.04997	1.08051	1.0886	1.09024	1.11128	1.03667	6367	CCL22	M-IL4
-2.31113	-2.27711	-2.36533	-2.27302	-2.40827	-2.31099	6374	CXCL5	M-IL4
-1.16961	-1.17562	-1.17781	-1.16117	-1.16611	-1.15527	8685	MARCO	M-IL4
1.51847	1.45253	1.51747	1.49875	1.50195	1.4759	8727	CTNNAL1	M-IL4
5.46463	5.76637	5.77184	5.88195	5.46266	5.12468	Sum		M-IL4
-1.73758	-1.73758	-1.73758	-1.73758	-1.73758	-1.73758	(Intercept)		M-IL10
1.27235	1.35893	1.33201	1.34001	1.32072	1.33487	10135	NAMPT	M-IL10
-0.583229	-0.55713	-0.580245	-0.579291	-0.570301	-0.571716	241	ALOX5AP	M-IL10
-0.917486	-0.910627	-0.90517	-0.887513	-0.895214	-0.909085	3620	IDO1	M-IL10
-0.711173	-0.813157	-0.762253	-0.72584	-0.788198	-0.733546	4495	MT1G	M-IL10
2.34814	1.99556	2.1172	2.06194	2.11825	2.03134	5168	ENPP2	M-IL10
0.579739	0.529461	0.560778	0.56235	0.517255	0.54161	5360	PLTP	M-IL10
0.0719965	0.0716355	0.0703802	0.0713243	0.0729156	0.0714782	597	BCL2A1	M-IL10
0.360987	0.364332	0.361849	0.365744	0.355691	0.358131	6147	RPL23A	M-IL10
0.78091	0.741631	0.756926	0.757546	0.763253	0.761558	6167	RPL37	M-IL10
0.844078	0.833198	0.880026	0.814413	0.915584	0.88302	6280	S100A9	M-IL10
-1.0738	-1.09495	-1.10172	-1.11146	-1.30468	-1.23383	6352	CCL5	M-IL10
1.03207	1.05235	1.08372	1.0334	0.996937	1.04733	6362	CCL18	M-IL10
0.32533	0.318023	0.34404	0.309956	0.345848	0.284439	7056	THBD	M-IL10
-0.937714	-1.00231	-0.940966	-0.919111	-0.922152	-0.990164	7130	TNFAIP6	M-IL10
1.98379	1.99397	1.99769	1.96947	1.97785	1.95947	8685	MARCO	M-IL10
0.34924	0.346776	0.345003	0.357242	0.342951	0.336028	9021	SOCS3	M-IL10
0.129429	0.132518	0.134121	0.136864	0.140144	0.143102	961	CD47	M-IL10
4.11707	3.62263	3.9558	3.81947	3.64927	3.57645	Sum		M-IL10
-0.952233	-0.952233	-0.952233	-0.952233	-0.952233	-0.952233	(Intercept)		M-dex
2.33749	2.39818	2.30183	2.29367	2.46987	2.40163	11326	VSIG4	M-dex
3.71691	3.72502	3.63111	3.72801	3.66588	3.65278	140	ADORA3	M-dex
0.193223	0.186557	0.19082	0.195325	0.187332	0.195834	247	ALOX15B	M-dex
-1.39637	-1.4129	-1.35078	-1.42755	-1.36841	-1.43549	27128	CYTH4	M-dex
0.510845	0.480047	0.492743	0.484793	0.470271	0.492677	2730	GCLM	M-dex
-0.0291874	-0.0298637	-0.0290029	-0.0285608	-0.0292736	-0.0297204	3553	IL1B	M-dex
-0.308987	-0.304743	-0.3029	-0.307074	-0.308437	-0.308438	3727	JUND	M-dex
-0.406354	-0.407883	-0.399925	-0.39189	-0.396681	-0.400326	5341	PLEK	M-dex
0.568398	0.560757	0.580495	0.563277	0.536169	0.555999	54541	DDIT4	M-dex
-0.478788	-0.48822	-0.491237	-0.49558	-0.581735	-0.550144	6352	CCL5	M-dex
-0.462744	-0.471837	-0.485903	-0.463341	-0.446991	-0.469584	6362	CCL18	M-dex
0.904299	0.963883	0.918843	0.998298	0.987089	0.95487	7035	TFPI	M-dex
0.308317	0.309084	0.304477	0.308666	0.306493	0.315893	8460	TPST1	M-dex
0.141298	0.143466	0.13631	0.136358	0.140648	0.137352	9886	RHOBTB1	M-dex
4.64611	4.69932	4.54464	4.64217	4.67999	4.56111	Sum		M-dex

## Sheet: GSE75938
GSM1970466	GSM1970467	GSM1970468	GSM1970469	GSM1970470	GSM1970471	GSM1970472	GSM1970473	GSM1970474	GSM1970475	GSM1970476	GSM1970477	entrez	gene	class
1.04445	1.04445	1.04445	1.04445	1.04445	1.04445	1.04445	1.04445	1.04445	1.04445	1.04445	1.04445	(Intercept)		M0
-2.14838	-2.30089	-2.0939	-3.2356	-3.30226	-3.07416	-2.00339	-2.21245	-2.14701	-3.06713	-3.2259	-2.79235	10148	EBI3	M0
0.064474	0.0633385	0.0615354	0.142034	0.11706	0.0948637	0.0787557	0.101938	0.096541	0.13863	0.137324	0.134564	10964	IFI44L	M0
0.0215109	0.02069	0.0208359	0.0180784	0.0167987	0.0176133	0.0204862	0.0196913	0.0202324	0.019003	0.0191784	0.0192813	2	A2M	M0
-0.545309	-0.545922	-0.527011	-0.527825	-0.522604	-0.488667	-0.575631	-0.597097	-0.565384	-0.489526	-0.505172	-0.471178	2289	FKBP5	M0
0.840465	1.01708	1.11441	0.636688	0.661919	0.704868	0.95591	1.07478	1.08535	0.67006	0.684375	0.699234	23166	STAB1	M0
1.10986	1.12835	1.1175	0.829449	0.75518	0.81667	1.01459	1.2671	1.15557	0.898702	0.883012	0.920349	2517	FUCA1	M0
1.77363	1.72601	1.68817	1.2964	1.2318	1.27524	1.84027	1.76848	1.80699	1.61309	1.62076	1.60295	2760	GM2A	M0
1.75646	1.67167	1.69364	1.7473	1.8403	1.8622	1.74142	1.79437	1.79411	1.8016	1.83697	1.79372	3357	HTR2B	M0
-0.618186	-0.577164	-0.585643	-0.575567	-0.587028	-0.604264	-0.678814	-0.622442	-0.608418	-0.682552	-0.617122	-0.617578	347902	AMIGO2	M0
-0.515533	-0.520542	-0.472412	-1.0984	-1.07974	-1.11671	-0.464303	-0.595413	-0.591855	-1.13369	-1.12184	-1.1287	3620	IDO1	M0
0.00622999	0.00608769	0.00662618	0.0147754	0.00755953	0.00709604	0.00800664	0.0111975	0.0111357	0.00993722	0.0114163	0.0102735	3627	CXCL10	M0
0.0653641	0.0659282	0.0649316	0.0760427	0.0929862	0.12366	0.0765009	0.0704628	0.0768738	0.126258	0.122849	0.129441	4495	MT1G	M0
1.9617	1.95221	1.95231	1.32877	1.51323	1.38995	1.92606	1.82087	1.90847	1.3173	1.21605	1.29066	54209	TREM2	M0
0.159421	0.198257	0.213647	0.130139	0.146199	0.182517	0.173557	0.21956	0.215229	0.138104	0.143026	0.146644	6035	RNASE1	M0
-1.04651	-1.76543	-1.85782	-1.0286	-1.65814	-1.8346	-0.952604	-1.60836	-1.70089	-1.68509	-1.44431	-1.57558	6362	CCL18	M0
-0.760776	-0.754855	-0.751473	-0.797181	-0.785931	-0.914387	-0.884998	-0.857421	-0.960972	-1.11595	-1.11052	-1.14951	64116	SLC39A8	M0
-1.23528	-1.22326	-1.19047	-1.24279	-1.37147	-1.43128	-1.01891	-1.16767	-1.05964	-1.36411	-1.39223	-1.32754	6504	SLAMF1	M0
-0.015869	-0.0155615	-0.0158538	-0.0163977	-0.0161949	-0.0233199	-0.0167124	-0.0164747	-0.0179372	-0.0271062	-0.0287552	-0.0283866	654	BMP6	M0
0.314992	0.325102	0.313733	0.228267	0.294035	0.274346	0.37067	0.371406	0.366948	0.233198	0.229201	0.233479	6653	SORL1	M0
1.46715	1.44422	1.4429	1.37711	1.41435	1.38548	1.4538	1.4338	1.43265	1.34838	1.38528	1.36767	6881	TAF10	M0
-0.212596	-0.195839	-0.1992	-0.220485	-0.271065	-0.332557	-0.238156	-0.223576	-0.244115	-0.296984	-0.312235	-0.301259	7035	TFPI	M0
0.742869	0.790291	0.724071	0.50317	0.461882	0.509357	0.804269	0.833664	0.845244	0.756241	0.572699	0.670363	7078	TIMP3	M0
1.47637	1.46067	1.51543	1.16561	1.16446	1.14485	1.59075	1.55573	1.58081	1.16633	1.13611	1.13067	8536	CAMK1	M0
-0.055802	-0.0553882	-0.0605419	-0.0619624	-0.0625186	-0.0597046	-0.0752326	-0.0672658	-0.0676797	-0.0600633	-0.0651329	-0.0583953	8853	ASAP2	M0
0.642191	0.608727	0.619434	0.61571	0.566552	0.607458	0.786458	0.819261	0.846195	0.679664	0.653756	0.706979	9214	FCMR	M0
0.429668	0.41224	0.429537	0.413175	0.415022	0.412577	0.681401	0.619161	0.589711	0.436392	0.415858	0.424844	9398	CD101	M0
-0.424427	-0.411914	-0.427915	-0.458075	-0.454583	-0.425729	-0.415079	-0.403376	-0.417065	-0.363408	-0.369553	-0.351833	961	CD47	M0
1.17991	1.24287	1.1948	1.78941	1.28875	1.29277	1.57808	1.65687	1.86029	1.71527	1.4183	1.53236	9966	TNFSF15	M0
7.47803	6.81141	7.03572	4.0937	2.92102	2.84058	8.8216	8.11126	8.35583	3.82698	3.33784	4.05561	Sum		M0
0.852937	0.852937	0.852937	0.852937	0.852937	0.852937	0.852937	0.852937	0.852937	0.852937	0.852937	0.852937	(Intercept)		M-LPSearly
-0.471056	-0.440956	-0.440455	-0.34911	-0.364948	-0.382607	-0.549806	-0.525756	-0.543889	-0.414516	-0.387922	-0.401872	2353	FOS	M-LPSearly
0.468172	0.477388	0.469444	0.519486	0.504699	0.738825	0.589822	0.732938	0.845388	0.810884	0.725249	0.869683	2919	CXCL1	M-LPSearly
-2.36482	-2.36112	-2.40902	-2.26685	-2.53116	-2.6239	-3.14605	-2.62935	-2.53239	-2.34075	-2.52776	-2.52096	3148	HMGB2	M-LPSearly
2.03298	2.06394	2.23672	1.95739	1.92283	2.10728	4.0774	3.79808	3.55356	2.76708	2.25231	2.47933	5806	PTX3	M-LPSearly
-0.244002	-0.247997	-0.255684	-0.231071	-0.223237	-0.233305	-0.240516	-0.241902	-0.250517	-0.244212	-0.239639	-0.231013	60370	AVPI1	M-LPSearly
-0.463534	-0.461783	-0.460865	-0.442726	-0.455959	-0.441206	-0.463516	-0.461647	-0.462522	-0.434404	-0.436087	-0.433212	6128	RPL6	M-LPSearly
-0.84447	-0.852051	-0.8596	-0.829282	-0.855892	-0.836268	-0.855262	-0.842571	-0.845307	-0.792254	-0.825164	-0.811995	6133	RPL9	M-LPSearly
-0.303445	-0.282812	-0.276099	-0.176543	-0.20938	-0.220713	-0.333629	-0.333231	-0.330586	-0.232033	-0.211429	-0.210444	6446	SGK1	M-LPSearly
2.8396	2.70939	2.77401	3.32856	2.76441	2.48793	3.37452	3.74442	3.66817	3.10583	2.77538	2.94102	7124	TNF	M-LPSearly
1.17709	1.15954	1.09654	1.94835	1.85511	2.05193	1.60071	1.54182	1.79318	2.25875	2.15634	2.24946	7130	TNFAIP6	M-LPSearly
2.67946	2.61647	2.72793	4.31114	3.25942	3.50091	4.90661	5.63574	5.74802	5.33731	4.13423	4.78293	Sum		M-LPSearly
3.45589	3.45589	3.45589	3.45589	3.45589	3.45589	3.45589	3.45589	3.45589	3.45589	3.45589	3.45589	(Intercept)		M-LPSlate
0.109321	0.117081	0.106548	0.164644	0.168035	0.156429	0.101943	0.11258	0.109251	0.156071	0.16415	0.142089	10148	EBI3	M-LPSlate
-0.063795	-0.061288	-0.0611027	-0.0438606	-0.0412628	-0.0380985	-0.0612073	-0.0567907	-0.0583232	-0.0462215	-0.0409926	-0.0412711	1043	CD52	M-LPSlate
0.0858732	0.0843609	0.0819593	0.189176	0.155912	0.126349	0.104895	0.135771	0.128583	0.184642	0.182903	0.179226	10964	IFI44L	M-LPSlate
-0.423798	-0.423096	-0.420111	-0.422728	-0.404993	-0.395661	-0.437792	-0.440293	-0.434507	-0.427589	-0.422664	-0.427076	1192	CLIC1	M-LPSlate
0.261055	0.26434	0.260874	0.288358	0.271258	0.279228	0.278878	0.280894	0.263752	0.30243	0.276439	0.292996	25862	USP49	M-LPSlate
-0.242967	-0.24775	-0.243627	-0.269597	-0.261923	-0.383428	-0.3061	-0.380373	-0.438731	-0.420824	-0.376382	-0.451339	2919	CXCL1	M-LPSlate
1.27161	1.35898	1.18341	1.53406	1.654	1.77855	1.55798	1.91632	1.92279	1.84139	1.85681	1.86852	3575	IL7R	M-LPSlate
1.18551	1.19702	1.08635	2.52586	2.48293	2.56796	1.0677	1.3692	1.36101	2.607	2.57976	2.59552	3620	IDO1	M-LPSlate
-0.929416	-0.908187	-0.988522	-2.20426	-1.12776	-1.05862	-1.19446	-1.67049	-1.66127	-1.48248	-1.70313	-1.53265	3627	CXCL10	M-LPSlate
-0.226826	-0.223814	-0.236468	-0.220744	-0.219177	-0.218372	-0.211591	-0.225804	-0.236571	-0.224658	-0.230312	-0.251634	3695	ITGB7	M-LPSlate
-0.0670033	-0.0663564	-0.0678799	-0.147076	-0.0993912	-0.0762771	-0.069912	-0.073124	-0.0831659	-0.0835229	-0.0776775	-0.0839335	4283	CXCL9	M-LPSlate
0.537005	0.54164	0.533452	0.624737	0.763938	1.01594	0.628501	0.578894	0.631565	1.03729	1.00928	1.06343	4495	MT1G	M-LPSlate
0.186864	0.19809	0.200111	0.196522	0.193239	0.193971	0.204259	0.213881	0.202691	0.205437	0.197877	0.204899	5866	RAB3IL1	M-LPSlate
-1.03778	-1.07109	-1.03363	-0.752055	-0.968736	-0.903869	-1.22122	-1.22364	-1.20896	-0.768302	-0.755131	-0.769226	6653	SORL1	M-LPSlate
1.3861	1.36543	1.29124	2.2943	2.18451	2.41628	1.88494	1.81559	2.11158	2.65982	2.53923	2.64887	7130	TNFAIP6	M-LPSlate
-0.424676	-0.433291	-0.415316	-0.463638	-0.458434	-0.457024	-0.481272	-0.5272	-0.569412	-0.470271	-0.453701	-0.489391	8857	FCGBP	M-LPSlate
-1.02457	-1.01703	-1.01053	-1.06802	-1.07638	-1.09299	-1.05983	-1.06205	-1.03601	-1.07124	-1.09756	-1.07097	9592	IER2	M-LPSlate
0.202857	0.212316	0.20267	0.221203	0.211587	0.212724	0.270844	0.268732	0.288168	0.235056	0.210593	0.249109	9832	JAKMIP2	M-LPSlate
4.24124	4.34324	3.9253	5.90276	6.88323	7.57899	4.51242	4.48797	4.74833	7.68992	7.31537	7.58305	Sum		M-LPSlate
-1.25281	-1.25281	-1.25281	-1.25281	-1.25281	-1.25281	-1.25281	-1.25281	-1.25281	-1.25281	-1.25281	-1.25281	(Intercept)		M-LPS+IFNγ
2.80667	3.00591	2.73549	4.22702	4.3141	4.01612	2.61725	2.89036	2.80487	4.00694	4.21436	3.64796	10148	EBI3	M-LPS+IFNγ
-1.53443	-1.53664	-1.51925	-0.826706	-0.853191	-0.870113	-1.40566	-1.54755	-1.3725	-0.874718	-0.827169	-0.849248	10462	CLEC10A	M-LPS+IFNγ
-0.0516455	-0.0509814	-0.0529633	-0.0488227	-0.0382353	-0.0441434	-0.0661911	-0.0690489	-0.0706705	-0.0574773	-0.0579927	-0.0579456	2012	EMP1	M-LPS+IFNγ
-1.40788	-1.34999	-1.33744	-1.36101	-1.23528	-1.42641	-1.79996	-1.53085	-1.60373	-1.91165	-1.67887	-1.99782	27242	TNFRSF21	M-LPS+IFNγ
0.384052	0.395446	0.375263	0.455588	0.451288	0.513335	0.37355	0.3732	0.370116	0.53389	0.544921	0.550554	3005	H1F0	M-LPS+IFNγ
0.248722	0.251139	0.227918	0.529931	0.520926	0.538765	0.224006	0.287261	0.285544	0.546956	0.54124	0.544547	3620	IDO1	M-LPS+IFNγ
0.749037	0.731929	0.796672	1.77646	0.90889	0.853164	0.962647	1.34629	1.33886	1.19476	1.37259	1.2352	3627	CXCL10	M-LPS+IFNγ
1.5948	1.57941	1.61567	3.50069	2.36569	1.81554	1.66404	1.74049	1.9795	1.988	1.84887	1.99777	4283	CXCL9	M-LPS+IFNγ
-0.0399401	-0.0401509	-0.0405116	-0.0409591	-0.0416793	-0.043243	-0.0448126	-0.0460374	-0.0487318	-0.0478557	-0.045791	-0.0475253	4327	MMP19	M-LPS+IFNγ
1.06554	1.02513	1.2258	1.68882	1.33381	1.17456	1.16595	1.41959	1.38667	1.6562	1.65542	1.64399	4600	MX2	M-LPS+IFNγ
1.05502	0.997892	0.935296	0.864483	0.893249	1.22469	1.3967	1.35499	1.37908	1.38928	1.40257	1.40893	5265	SERPINA1	M-LPS+IFNγ
-0.000892562	-0.000951838	-0.000978625	-0.000438435	-0.000480831	-0.000606486	-0.000958256	-0.000971862	-0.000892687	-0.000559649	-0.000552601	-0.000583023	64231	MS4A6A	M-LPS+IFNγ
0.0533545	0.05328	0.052397	0.0907371	0.0643404	0.0599684	0.0523492	0.0598209	0.0583676	0.0759957	0.081665	0.0861155	710	SERPING1	M-LPS+IFNγ
-1.3527	-1.27521	-1.17979	-1.10701	-1.09151	-0.906735	-1.44627	-1.42556	-1.4479	-0.983993	-1.03189	-0.932482	928	CD9	M-LPS+IFNγ
2.3169	2.5334	2.58077	8.49598	6.33911	5.65208	2.43984	3.59917	3.80577	6.26296	6.76657	5.97667	Sum		M-LPS+IFNγ
-0.579405	-0.579405	-0.579405	-0.579405	-0.579405	-0.579405	-0.579405	-0.579405	-0.579405	-0.579405	-0.579405	-0.579405	(Intercept)		M-IFNγ
0.206051	0.202937	0.204132	0.195954	0.191903	0.192053	0.206374	0.216099	0.221061	0.209032	0.211736	0.210881	10507	SEMA4D	M-IFNγ
0.358709	0.396234	0.432773	0.32052	0.289929	0.32046	0.366257	0.454742	0.398666	0.315168	0.292796	0.298855	3111	HLA-DOA	M-IFNγ
4.2395	4.19857	4.29496	9.30595	6.28877	4.82628	4.42354	4.62677	5.26215	5.28473	4.91488	5.31072	4283	CXCL9	M-IFNγ
-1.13196	-1.22396	-1.18781	-1.6253	-1.57303	-1.79184	-1.2449	-1.60096	-1.60283	-1.8484	-1.88103	-1.84704	50486	G0S2	M-IFNγ
-0.238788	-0.242424	-0.262719	-0.22991	-0.22585	-0.247514	-0.478919	-0.446111	-0.41739	-0.325013	-0.26455	-0.291215	5806	PTX3	M-IFNγ
-0.0390276	-0.0434072	-0.0366334	-0.0607444	-0.0629577	-0.0608332	-0.0399167	-0.0395572	-0.0452363	-0.0442106	-0.0546417	-0.0450606	5996	RGS1	M-IFNγ
-0.666992	-0.671374	-0.665588	-0.716347	-0.795833	-0.784291	-0.753823	-0.722745	-0.782979	-0.791796	-0.794242	-0.798588	6518	SLC2A5	M-IFNγ
-0.399182	-0.393232	-0.364505	-0.540771	-0.539718	-0.507963	-0.341622	-0.394246	-0.375563	-0.385481	-0.434798	-0.345446	6624	FSCN1	M-IFNγ
1.34221	1.3363	1.33877	1.31569	1.28496	1.22968	1.42366	1.40103	1.3703	1.2496	1.23785	1.26074	9941	EXOG	M-IFNγ
3.09111	2.98023	3.17398	7.38565	4.27877	2.59663	2.98124	2.91562	3.44877	3.08423	2.64859	3.17444	Sum		M-IFNγ
-0.836071	-0.836071	-0.836071	-0.836071	-0.836071	-0.836071	-0.836071	-0.836071	-0.836071	-0.836071	-0.836071	-0.836071	(Intercept)		M-IL4
1.82517	1.82779	1.80711	0.983346	1.01485	1.03498	1.672	1.84078	1.63256	1.04045	0.983896	1.01016	10462	CLEC10A	M-IL4
0.930687	0.918394	0.894567	0.927533	0.967839	0.930827	0.690837	0.634168	0.746156	0.762855	0.66943	0.642339	23022	PALLD	M-IL4
0.320778	0.294028	0.307119	0.273418	0.265315	0.279404	0.287961	0.272106	0.278492	0.292058	0.285307	0.288415	23397	NCAPH	M-IL4
-0.218023	-0.227454	-0.260435	-0.22433	-0.234774	-0.326421	-0.260123	-0.304388	-0.339996	-0.273275	-0.261813	-0.30393	25903	OLFML2B	M-IL4
-1.25895	-1.19818	-1.21393	-1.25239	-1.31905	-1.33475	-1.24818	-1.28613	-1.28594	-1.29131	-1.31666	-1.28566	3357	HTR2B	M-IL4
-0.308424	-0.278589	-0.323554	-0.307362	-0.343108	-0.528107	-0.506779	-0.543017	-0.558891	-0.585607	-0.570137	-0.593723	3553	IL1B	M-IL4
-0.51223	-0.517206	-0.469384	-1.09136	-1.07282	-1.10956	-0.461327	-0.591598	-0.588062	-1.12642	-1.11465	-1.12146	3620	IDO1	M-IL4
0.269483	0.273447	0.286783	0.249482	0.26614	0.271051	0.272709	0.272349	0.268727	0.250966	0.264026	0.246294	387509	GPR153	M-IL4
6.30536	6.05141	6.0494	6.2579	6.31592	6.43766	3.60292	4.05692	5.00331	5.85708	6.22669	5.86164	4128	MAOA	M-IL4
0.454615	0.456978	0.45856	0.357908	0.399472	0.311406	0.396856	0.397557	0.381966	0.314444	0.299777	0.294968	54518	APBB1IP	M-IL4
2.16913	3.65926	3.85077	2.13201	3.43689	3.80263	1.97449	3.33369	3.52548	3.49274	2.99366	3.26576	6362	CCL18	M-IL4
2.20924	2.17606	2.10171	2.24129	2.29288	2.26548	2.1229	2.08375	2.1125	2.07492	2.17107	2.08323	6367	CCL22	M-IL4
-1.36442	-1.43816	-1.41999	-1.40987	-1.49365	-2.55592	-1.93242	-1.84387	-2.94698	-3.29179	-3.18566	-3.69228	6374	CXCL5	M-IL4
-1.23933	-1.24255	-1.31673	-1.0461	-1.02974	-1.33851	-2.02774	-1.65957	-1.83467	-1.89455	-1.65795	-1.72619	8685	MARCO	M-IL4
1.47273	1.48392	1.47797	1.05044	1.05365	1.03408	1.12255	1.03277	1.12664	0.976148	0.951761	0.888619	8727	CTNNAL1	M-IL4
10.2197	11.4031	11.3939	8.30585	9.68374	8.33819	4.87059	6.85945	6.68522	5.76264	5.90268	5.0221	Sum		M-IL4
-1.73758	-1.73758	-1.73758	-1.73758	-1.73758	-1.73758	-1.73758	-1.73758	-1.73758	-1.73758	-1.73758	-1.73758	(Intercept)		M-IL10
1.06363	1.07177	1.10031	1.49053	1.25743	1.73135	1.27218	1.46977	1.50252	1.85336	1.87801	1.96317	10135	NAMPT	M-IL10
-0.891444	-0.935044	-0.892087	-0.640883	-0.705018	-0.733341	-1.06684	-1.05549	-1.04292	-0.822954	-0.929205	-0.943475	241	ALOX5AP	M-IL10
-0.80237	-0.810166	-0.735256	-1.70954	-1.68049	-1.73804	-0.722635	-0.926694	-0.921156	-1.76446	-1.74602	-1.75669	3620	IDO1	M-IL10
-0.571559	-0.576492	-0.567777	-0.664936	-0.813094	-1.08131	-0.668942	-0.616143	-0.672203	-1.10403	-1.07423	-1.13186	4495	MT1G	M-IL10
1.70504	1.72896	1.64975	1.81582	1.71021	1.89239	1.54753	1.77925	1.69132	1.79274	1.91816	1.69626	5168	ENPP2	M-IL10
0.449311	0.437726	0.436433	0.538833	0.468145	0.494246	0.581428	0.535855	0.691488	0.542011	0.54042	0.544765	5360	PLTP	M-IL10
0.0612067	0.0597941	0.0596341	0.0949116	0.0904292	0.0839118	0.100754	0.0967754	0.102504	0.103013	0.102498	0.105754	597	BCL2A1	M-IL10
0.429468	0.430647	0.4215	0.403035	0.416668	0.399668	0.43121	0.427612	0.424413	0.396716	0.405413	0.389679	6147	RPL23A	M-IL10
0.824427	0.821845	0.822454	0.730684	0.771449	0.732641	0.84007	0.789944	0.807276	0.739521	0.723148	0.702787	6167	RPL37	M-IL10
0.819948	0.765049	0.816606	0.813912	0.805556	1.17897	1.30077	1.27492	1.36194	1.30949	1.28521	1.3903	6280	S100A9	M-IL10
-0.979669	-0.945427	-1.04441	-1.68552	-1.50498	-1.72818	-1.07139	-1.11882	-1.34273	-1.80879	-1.81031	-1.82181	6352	CCL5	M-IL10
0.996235	1.68062	1.76858	0.97919	1.57849	1.74647	0.906843	1.53109	1.61918	1.60414	1.37492	1.49989	6362	CCL18	M-IL10
0.313587	0.30306	0.314297	0.257505	0.243631	0.30733	0.364681	0.360903	0.34732	0.335253	0.324848	0.348427	7056	THBD	M-IL10
-0.753627	-0.742388	-0.702054	-1.24742	-1.18773	-1.31374	-1.02485	-0.987141	-1.14807	-1.44615	-1.38059	-1.4402	7130	TNFAIP6	M-IL10
2.10203	2.1075	2.23332	1.7743	1.74655	2.27026	3.43926	2.81482	3.1118	3.21337	2.81206	2.92781	8685	MARCO	M-IL10
0.376533	0.370576	0.36856	0.471214	0.481508	0.567097	0.448745	0.483863	0.476518	0.561016	0.572319	0.565998	9021	SOCS3	M-IL10
0.141939	0.137755	0.143106	0.153192	0.152024	0.142375	0.138813	0.134899	0.139477	0.121533	0.123588	0.117662	961	CD47	M-IL10
3.5471	4.1682	4.45537	1.83724	2.0932	3.21451	5.08005	5.25784	5.41108	3.88818	3.38267	3.42089	Sum		M-IL10
-0.952233	-0.952233	-0.952233	-0.952233	-0.952233	-0.952233	-0.952233	-0.952233	-0.952233	-0.952233	-0.952233	-0.952233	(Intercept)		M-dex
1.86282	1.85856	1.87666	1.94891	1.93103	1.9501	3.50404	3.55831	3.4769	2.17513	2.04225	1.99723	11326	VSIG4	M-dex
4.77555	4.5825	5.27854	3.33884	3.19046	3.39526	3.93329	4.10482	3.8085	3.52174	3.31816	3.4563	140	ADORA3	M-dex
0.1869	0.181743	0.175455	0.275986	0.291486	0.301898	0.177671	0.178327	0.184869	0.279047	0.303261	0.269748	247	ALOX15B	M-dex
-2.06338	-1.95088	-2.04328	-1.3941	-1.38036	-1.86087	-1.92863	-1.89163	-1.95177	-2.01098	-2.03423	-2.14092	27128	CYTH4	M-dex
0.310246	0.31324	0.306073	0.330687	0.313811	0.330169	0.328358	0.350425	0.365185	0.318954	0.336195	0.349023	2730	GCLM	M-dex
-0.0317765	-0.0287027	-0.0333353	-0.0316671	-0.0353499	-0.0544101	-0.0522127	-0.0559464	-0.0575818	-0.0603343	-0.0587404	-0.0611704	3553	IL1B	M-dex
-0.173027	-0.17423	-0.17335	-0.181837	-0.178485	-0.188783	-0.167281	-0.17852	-0.183182	-0.183932	-0.181959	-0.182219	3727	JUND	M-dex
-0.716021	-0.711125	-0.706852	-0.712844	-0.685344	-0.563368	-0.740592	-0.75666	-0.752194	-0.637398	-0.644867	-0.599556	5341	PLEK	M-dex
0.309238	0.299799	0.293588	0.362001	0.414981	0.585548	0.381165	0.344464	0.432167	0.567122	0.588909	0.590123	54541	DDIT4	M-dex
-0.436817	-0.421549	-0.465686	-0.751544	-0.671046	-0.770563	-0.477713	-0.498861	-0.5987	-0.806509	-0.807185	-0.812312	6352	CCL5	M-dex
-0.446676	-0.753532	-0.792968	-0.439034	-0.707739	-0.783054	-0.406596	-0.686488	-0.725983	-0.719242	-0.616468	-0.672499	6362	CCL18	M-dex
0.61737	0.568706	0.578467	0.640279	0.78716	0.965731	0.691595	0.649254	0.708897	0.862426	0.906715	0.874843	7035	TFPI	M-dex
0.145824	0.137641	0.144177	0.190759	0.227599	0.221453	0.17191	0.150132	0.174711	0.212363	0.253644	0.215879	8460	TPST1	M-dex
0.102342	0.117804	0.128804	0.105697	0.109391	0.102592	0.124962	0.11224	0.114505	0.109736	0.110362	0.113441	9886	RHOBTB1	M-dex
3.49036	3.06774	3.61407	2.7299	2.65536	2.67947	4.58773	4.42764	4.04409	2.67589	2.56382	2.44568	Sum		M-dex

## Sheet: GSE99056
GSM2631417	GSM2631418	GSM2631419	GSM2631420	GSM2631421	GSM2631422	entrez	gene	class
1.04445	1.04445	1.04445	1.04445	1.04445	1.04445	(Intercept)		M0
-1.27149	-1.46485	-1.28907	-2.89748	-3.0088	-2.82423	10148	EBI3	M0
0.0789279	0.0991532	0.0696785	0.149716	0.155389	0.148483	10964	IFI44L	M0
0.0300393	0.0306075	0.0294345	0.029856	0.0303692	0.0290313	2	A2M	M0
-0.553534	-0.529517	-0.555249	-0.55868	-0.526086	-0.55239	2289	FKBP5	M0
0.863832	0.947058	0.883921	0.829393	0.90114	0.917403	23166	STAB1	M0
1.67546	1.69964	1.6244	1.63246	1.68352	1.58006	2517	FUCA1	M0
2.71741	2.70066	2.66884	2.63031	2.64288	2.59431	2760	GM2A	M0
1.14783	1.08316	1.12627	1.26638	1.3553	1.04275	3357	HTR2B	M0
-1.23143	-0.986705	-0.978894	-1.41237	-1.12599	-1.17415	347902	AMIGO2	M0
-0.466971	-0.543758	-0.467864	-1.40359	-1.41341	-1.36609	3620	IDO1	M0
0.00652004	0.00707103	0.00544867	0.0205825	0.0198111	0.0190214	3627	CXCL10	M0
0.12538	0.11998	0.12248	0.12248	0.119181	0.117881	4495	MT1G	M0
2.38727	2.45254	2.38556	2.25675	2.3409	2.29453	54209	TREM2	M0
0.257263	0.305278	0.2707	0.242444	0.293818	0.262203	6035	RNASE1	M0
-1.80932	-2.07164	-2.24148	-2.08005	-2.1305	-2.34909	6362	CCL18	M0
-0.898959	-0.989478	-0.983255	-1.19371	-1.16259	-1.24802	64116	SLC39A8	M0
-0.741627	-0.964323	-0.889397	-1.50615	-1.64074	-1.60882	6504	SLAMF1	M0
-0.0131616	-0.0141804	-0.0126935	-0.0166034	-0.0196598	-0.0129138	654	BMP6	M0
0.475924	0.483263	0.469686	0.457577	0.451706	0.456843	6653	SORL1	M0
1.7148	1.76787	1.72743	1.68447	1.68068	1.68447	6881	TAF10	M0
-0.27067	-0.258945	-0.26464	-0.283734	-0.26196	-0.264305	7035	TFPI	M0
0.898696	0.837062	0.863715	0.817073	0.766266	0.779592	7078	TIMP3	M0
1.52259	1.5865	1.55383	1.44731	1.55383	1.47287	8536	CAMK1	M0
-0.0747455	-0.0780882	-0.0792952	-0.0860734	-0.0868162	-0.0887661	8853	ASAP2	M0
1.06816	1.08298	1.03429	1.03323	1.07134	1.03746	9214	FCMR	M0
0.486892	0.490613	0.489993	0.480689	0.486271	0.450297	9398	CD101	M0
-0.612812	-0.620622	-0.612353	-0.649103	-0.639456	-0.626134	961	CD47	M0
1.28397	1.82448	1.59668	2.4002	2.63835	2.56794	9966	TNFSF15	M0
9.84068	10.0403	9.59262	6.45783	7.21919	6.38467	Sum		M0
0.852937	0.852937	0.852937	0.852937	0.852937	0.852937	(Intercept)		M-LPSearly
-0.660748	-0.629017	-0.652038	-0.560578	-0.523248	-0.548135	2353	FOS	M-LPSearly
0.55759	0.662138	0.626897	1.18253	1.18096	1.21659	2919	CXCL1	M-LPSearly
-3.93232	-3.64176	-3.94847	-3.60301	-3.43836	-3.70956	3148	HMGB2	M-LPSearly
4.38507	3.96343	3.64299	7.14683	6.5228	6.73784	5806	PTX3	M-LPSearly
-0.347442	-0.35637	-0.355916	-0.307946	-0.329586	-0.331704	60370	AVPI1	M-LPSearly
-0.590935	-0.595358	-0.589461	-0.571219	-0.58596	-0.571588	6128	RPL6	M-LPSearly
-1.15956	-1.15238	-1.17178	-1.13945	-1.12795	-1.14879	6133	RPL9	M-LPSearly
-0.428337	-0.433684	-0.430026	-0.414547	-0.413421	-0.39935	6446	SGK1	M-LPSearly
3.34504	3.49048	3.39725	6.30599	6.38057	6.10461	7124	TNF	M-LPSearly
1.37684	1.63061	1.49515	2.81369	2.72625	2.81198	7130	TNFAIP6	M-LPSearly
3.39814	3.79103	2.86754	11.7052	11.245	11.0148	Sum		M-LPSearly
3.45589	3.45589	3.45589	3.45589	3.45589	3.45589	(Intercept)		M-LPSlate
0.0646999	0.074539	0.0655943	0.147438	0.153103	0.143711	10148	EBI3	M-LPSlate
-0.101178	-0.099775	-0.0991016	-0.100112	-0.098821	-0.0979231	1043	CD52	M-LPSlate
0.105124	0.132063	0.0928051	0.199408	0.206964	0.197765	10964	IFI44L	M-LPSlate
-0.517593	-0.521566	-0.51687	-0.530957	-0.53493	-0.530957	1192	CLIC1	M-LPSlate
0.238813	0.241225	0.233023	0.247014	0.227716	0.297671	25862	USP49	M-LPSlate
-0.289372	-0.343629	-0.32534	-0.613696	-0.612884	-0.631376	2919	CXCL1	M-LPSlate
1.852	1.77002	1.76037	2.38253	2.33591	2.3552	3575	IL7R	M-LPSlate
1.07383	1.25041	1.07589	3.22766	3.25025	3.14143	3620	IDO1	M-LPSlate
-0.972687	-1.05489	-0.812856	-3.07059	-2.95551	-2.83769	3627	CXCL10	M-LPSlate
-0.292418	-0.310587	-0.30207	-0.291566	-0.315982	-0.29838	3695	ITGB7	M-LPSlate
-0.0491194	-0.0533739	-0.0469277	-0.141815	-0.145682	-0.132661	4283	CXCL9	M-LPSlate
1.03007	0.985712	1.00625	1.00625	0.97914	0.968462	4495	MT1G	M-LPSlate
0.215668	0.249546	0.228977	0.201452	0.209316	0.179673	5866	RAB3IL1	M-LPSlate
-1.56799	-1.59217	-1.54744	-1.50755	-1.4882	-1.50513	6653	SORL1	M-LPSlate
1.62131	1.92014	1.76063	3.3133	3.21032	3.31128	7130	TNFAIP6	M-LPSlate
-0.605588	-0.376024	-0.372733	-0.622867	-0.355454	-0.370264	8857	FCGBP	M-LPSlate
-1.33671	-1.3444	-1.31077	-1.35209	-1.37611	-1.33767	9592	IER2	M-LPSlate
0.5377	0.53899	0.522429	0.508879	0.508664	0.495114	9832	JAKMIP2	M-LPSlate
4.46245	4.92211	4.86774	6.45858	6.65369	6.80413	Sum		M-LPSlate
-1.25281	-1.25281	-1.25281	-1.25281	-1.25281	-1.25281	(Intercept)		M-LPS+IFNγ
1.66109	1.9137	1.68405	3.78529	3.93073	3.68961	10148	EBI3	M-LPS+IFNγ
-0.900185	-1.01205	-1.06469	-0.859387	-1.05811	-1.09891	10462	CLEC10A	M-LPS+IFNγ
-0.100435	-0.0954847	-0.0973084	-0.10037	-0.0922932	-0.0948985	2012	EMP1	M-LPS+IFNγ
-3.0277	-2.69105	-2.69991	-2.84166	-2.59359	-2.61131	27242	TNFRSF21	M-LPS+IFNγ
0.443333	0.440116	0.495332	0.425106	0.440652	0.477642	3005	H1F0	M-LPS+IFNγ
0.225293	0.26234	0.225724	0.677172	0.681911	0.65908	3620	IDO1	M-LPS+IFNγ
0.783911	0.850157	0.655099	2.47466	2.38191	2.28696	3627	CXCL10	M-LPS+IFNγ
1.16913	1.2704	1.11697	3.37545	3.46751	3.15758	4283	CXCL9	M-LPS+IFNγ
-0.0583731	-0.0579804	-0.0563815	-0.0596354	-0.0635905	-0.0653577	4327	MMP19	M-LPS+IFNγ
1.20136	1.26644	1.18088	1.63788	1.59986	1.6335	4600	MX2	M-LPS+IFNγ
1.11896	1.13655	1.1043	1.17819	1.16353	1.25619	5265	SERPINA1	M-LPS+IFNγ
-0.000777971	-0.000748334	-0.000819811	-0.000726978	-0.000748334	-0.00078538	64231	MS4A6A	M-LPS+IFNγ
0.0634805	0.0635755	0.0632429	0.0803009	0.0793031	0.0774025	710	SERPING1	M-LPS+IFNγ
-1.77643	-1.76141	-1.74638	-1.67378	-1.6575	-1.64248	928	CD9	M-LPS+IFNγ
-0.450154	0.331747	-0.392698	6.8457	7.02677	6.47141	Sum		M-LPS+IFNγ
-0.579405	-0.579405	-0.579405	-0.579405	-0.579405	-0.579405	(Intercept)		M-IFNγ
0.160777	0.182861	0.187502	0.202413	0.217463	0.226607	10507	SEMA4D	M-IFNγ
0.322244	0.30039	0.361493	0.328488	0.301951	0.35458	3111	HLA-DOA	M-IFNγ
3.10793	3.37712	2.96925	8.97302	9.21774	8.39385	4283	CXCL9	M-IFNγ
-1.10415	-1.16059	-1.48161	-2.44465	-2.25063	-2.63162	50486	G0S2	M-IFNγ
-0.515058	-0.465533	-0.427894	-0.839445	-0.766148	-0.791406	5806	PTX3	M-IFNγ
-0.0621792	-0.0598195	-0.0615893	-0.0719132	-0.0695534	-0.0711463	5996	RGS1	M-IFNγ
-0.658542	-0.615545	-0.702671	-0.721907	-0.752458	-0.741143	6518	SLC2A5	M-IFNγ
-0.62698	-0.635562	-0.618397	-0.664472	-0.688865	-0.639628	6624	FSCN1	M-IFNγ
1.26813	1.35926	1.26142	1.17604	1.22401	1.30842	9941	EXOG	M-IFNγ
1.31277	1.70317	0.908103	5.35817	5.8541	4.82912	Sum		M-IFNγ
-0.836071	-0.836071	-0.836071	-0.836071	-0.836071	-0.836071	(Intercept)		M-IL4
1.07075	1.20381	1.26642	1.02222	1.2586	1.30713	10462	CLEC10A	M-IL4
0.614495	0.669431	0.644318	0.635685	0.703962	0.671001	23022	PALLD	M-IL4
0.353025	0.31275	0.322197	0.367444	0.284906	0.353522	23397	NCAPH	M-IL4
-0.278735	-0.288128	-0.286787	-0.261865	-0.271259	-0.277585	25903	OLFML2B	M-IL4
-0.822716	-0.776366	-0.807266	-0.907692	-0.971423	-0.747397	3357	HTR2B	M-IL4
-0.451288	-0.505769	-0.489879	-0.795429	-0.800877	-0.799061	3553	IL1B	M-IL4
-0.463979	-0.540274	-0.464866	-1.3946	-1.40436	-1.35734	3620	IDO1	M-IL4
0.196032	0.192216	0.187358	0.205053	0.200543	0.179031	387509	GPR153	M-IL4
5.58481	5.76771	5.96891	5.81649	5.82259	5.95062	4128	MAOA	M-IL4
0.568679	0.571297	0.565406	0.50605	0.485101	0.494266	54518	APBB1IP	M-IL4
3.75024	4.29396	4.64598	4.31138	4.41594	4.86904	6362	CCL18	M-IL4
1.84359	1.67991	1.8522	1.897	1.75572	1.9642	6367	CCL22	M-IL4
-3.95477	-4.83068	-4.51127	-4.62652	-4.79775	-4.86361	6374	CXCL5	M-IL4
-2.81969	-2.69902	-2.82479	-2.80099	-2.70241	-2.83159	8685	MARCO	M-IL4
1.56557	1.49795	1.55936	1.52693	1.49657	1.50485	8727	CTNNAL1	M-IL4
5.91993	5.71272	6.79123	4.66509	4.63977	5.58101	Sum		M-IL4
-1.73758	-1.73758	-1.73758	-1.73758	-1.73758	-1.73758	(Intercept)		M-IL10
1.20677	1.35674	1.28264	2.11715	2.17537	2.22124	10135	NAMPT	M-IL10
-1.40248	-1.35617	-1.31685	-1.34568	-1.28015	-1.25481	241	ALOX5AP	M-IL10
-0.726789	-0.846299	-0.728179	-2.18454	-2.19982	-2.12617	3620	IDO1	M-IL10
-1.09635	-1.04914	-1.071	-1.071	-1.04214	-1.03078	4495	MT1G	M-IL10
1.57308	1.71246	1.56312	1.9076	1.89367	1.75428	5168	ENPP2	M-IL10
0.763323	0.815322	0.803989	0.756657	0.832656	0.807323	5360	PLTP	M-IL10
0.153996	0.150715	0.15098	0.161141	0.158971	0.160135	597	BCL2A1	M-IL10
0.547429	0.547252	0.559822	0.539285	0.53539	0.546721	6147	RPL23A	M-IL10
1.15335	1.16531	1.17883	1.15023	1.15231	1.14035	6167	RPL37	M-IL10
1.7334	1.66835	1.67799	1.6816	1.60692	1.63462	6280	S100A9	M-IL10
-1.01816	-1.49098	-1.34449	-2.06678	-2.26258	-2.27128	6352	CCL5	M-IL10
1.72241	1.97212	2.1338	1.98013	2.02815	2.23625	6362	CCL18	M-IL10
0.459795	0.444989	0.420313	0.461851	0.42237	0.423192	7056	THBD	M-IL10
-0.881514	-1.04399	-0.957261	-1.80145	-1.74546	-1.80035	7130	TNFAIP6	M-IL10
4.7825	4.57783	4.79115	4.75079	4.58359	4.80268	8685	MARCO	M-IL10
0.368409	0.446276	0.464283	0.568917	0.586924	0.623424	9021	SOCS3	M-IL10
0.20494	0.207552	0.204787	0.217077	0.213851	0.209395	961	CD47	M-IL10
7.80652	7.54076	8.07634	6.0854	5.92243	6.33864	Sum		M-IL10
-0.952233	-0.952233	-0.952233	-0.952233	-0.952233	-0.952233	(Intercept)		M-dex
5.60445	5.67755	5.78547	5.30856	5.32249	5.49306	11326	VSIG4	M-dex
3.41119	3.44888	3.10157	2.35041	2.63849	3.06118	140	ADORA3	M-dex
0.290251	0.304676	0.297022	0.315862	0.328225	0.317628	247	ALOX15B	M-dex
-2.35472	-2.49265	-2.347	-1.91114	-2.20907	-2.10203	27128	CYTH4	M-dex
0.595725	0.578719	0.619431	0.599333	0.528732	0.631283	2730	GCLM	M-dex
-0.0464956	-0.0521087	-0.0504716	-0.081952	-0.0825133	-0.0823262	3553	IL1B	M-dex
-0.205225	-0.209873	-0.209641	-0.216381	-0.214289	-0.224283	3727	JUND	M-dex
-0.836315	-0.843804	-0.81135	-0.954897	-0.928684	-0.918074	5341	PLEK	M-dex
0.485651	0.477655	0.613595	0.588006	0.565083	0.699423	54541	DDIT4	M-dex
-0.45398	-0.664802	-0.599486	-0.92154	-1.00884	-1.01272	6352	CCL5	M-dex
-0.772267	-0.884231	-0.956721	-0.887819	-0.909351	-1.00265	6362	CCL18	M-dex
0.786013	0.751966	0.768503	0.823952	0.760721	0.76753	7035	TFPI	M-dex
0.201407	0.256128	0.233208	0.17419	0.220029	0.18565	8460	TPST1	M-dex
0.202693	0.191315	0.190894	0.162449	0.160553	0.130212	9886	RHOBTB1	M-dex
5.95614	5.58719	5.68279	4.3968	4.21934	4.99164	Sum		M-dex
